# Supplementary material for: Patient and physician expectations regarding disease and treatment of advanced HCC: The prospective PERCEPTION1 study
Source: PubMed Central journal article supplement (PMC11686048; doi:10.1016/j.jhepr.2024.101192), 2024-08-22
Supplement: mmc1.pdf [file mmc1.pdf]

**Patient and physician expectations regarding disease and treatment of advanced HCC: The prospective PERCEPTION1 study**

Jean-Charles Nault, Nanthara Sritharan, Gontran Verset, Ivan Borbath, Marie Lequoy, Manon Allaire, H  l  ne Regnault, Isabelle Colle, Hans Orient, Isabelle Sinapi, Christophe Moreno, Edouard Larrey, Sabrina Sidali, Cl  mence Hollande, Giuliana Amaddeo, Stanislas Pol, Pierre Nahon, Nathalie Ganne-Carri  , Vincent Levy, Coralie Bloch-Queyrat, *Paris Liver Cancer Group*, Eric Trepo, Mohammed Bouattour

Table of contents

|               |    |
|---------------|----|
| Fig. S1.....  | 2  |
| Table S1..... | 3  |
| Table S2..... | 4  |
| Table S3..... | 7  |
| Table S4..... | 9  |
| Table S5..... | 10 |
| Table S6..... | 11 |
| Table S7..... | 12 |

Fig. S1. Flowchart of the study.

Flow chart

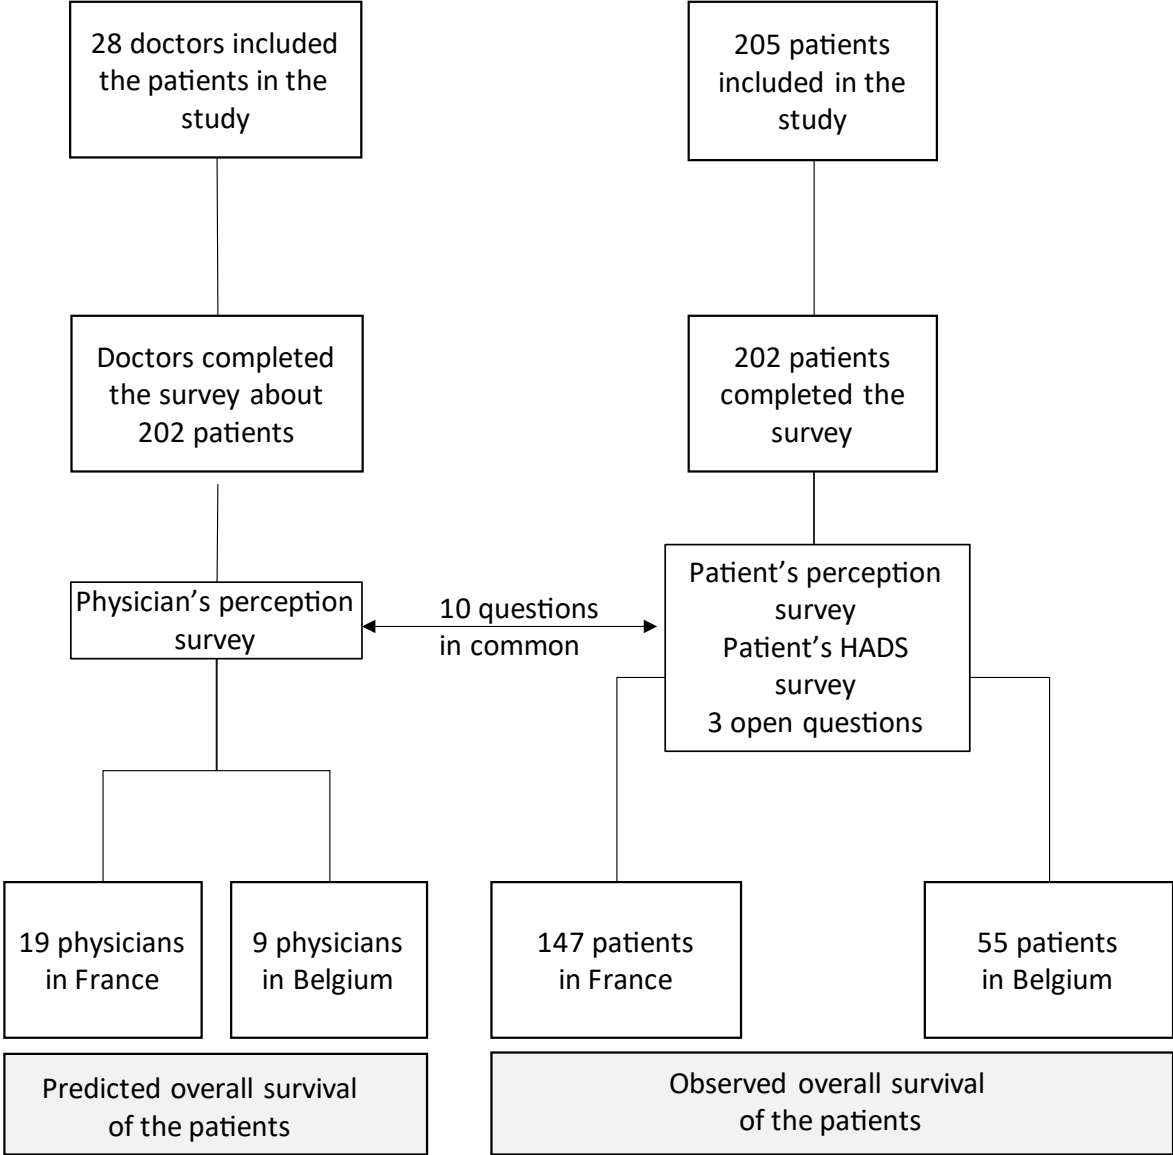

**Table S1: Description of the physicians including patients in the PERCEPTION1 study**

|                                                            | <b>Total<br/>N= 28 physicians</b> | <b>Belgium<br/>N= 9 physicians</b> | <b>France<br/>N= 19 physicians</b> |
|------------------------------------------------------------|-----------------------------------|------------------------------------|------------------------------------|
| <b>Gender*</b>                                             |                                   |                                    |                                    |
| Male                                                       | 13 (46.4%)                        | 7 (77.8%)                          | 6 (31.6%)                          |
| Female                                                     | 15 (53.6%)                        | 2 (22.2%)                          | 13 (68.4%)                         |
| <b>Age of the physician (year olds)<sup>§</sup></b>        | 43.0 [38.0;50.2]                  | 51.0 [43.0;53.0]                   | 41.0 [37.5;48.0]                   |
| <b>Medical Specialty*</b>                                  |                                   |                                    |                                    |
| Hepato-gastroenterology                                    | 26 (92.9%)                        | 7 (77.8%)                          | 19 (100.0%)                        |
| Medical oncology                                           | 2 (7.1%)                          | 2 (22.2%)                          | 0 (0%)                             |
| <b>Date of medical graduation*</b>                         |                                   |                                    |                                    |
| Less than 5 years                                          | 7 (25.0%)                         | 0 (0%)                             | 7 (36.8%)                          |
| Between 5 and 10 years                                     | 6 (21.4%)                         | 2 (22.2%)                          | 4 (21.1%)                          |
| Between 10 and 20 years                                    | 8 (28.6%)                         | 3 (33.3%)                          | 5 (26.3%)                          |
| Between 20 and 30 years                                    | 6 (21.4%)                         | 4 (44.4%)                          | 2 (10.5%)                          |
| More than 30 years                                         | 1 (3.6%)                          | 0 (0%)                             | 1 (5.3%)                           |
| <b>Numbers of patients treated for HCC<br/>each years*</b> |                                   |                                    |                                    |
| Less than 5                                                | 0 (0%)                            | 0 (0%)                             | 0 (0%)                             |
| Between 5 and 20                                           | 9 (32.1%)                         | 7 (77.8%)                          | 2 (10.5%)                          |
| Between 20 and 50                                          | 5 (17.9%)                         | 0 (0.0%)                           | 5 (26.3%)                          |
| Between 50 and 100                                         | 6 (21.4%)                         | 1 (11.1%)                          | 5 (26.3%)                          |
| More than 100                                              | 8 (28.6%)                         | 1 (11.1%)                          | 7 (36.8%)                          |

\*numbers (percentage) <sup>§</sup> median (interquartile range)

HCC = hepatocellular carcinoma

**Table S2: Results of the physician's survey**

|                                                                                                                                               | <b>Total<br/>N= 205 patients</b> | <b>Belgium<br/>N= 55 patients</b> | <b>France<br/>N= 150 patients</b> | <b>p</b> | <b>Available<br/>data</b> |
|-----------------------------------------------------------------------------------------------------------------------------------------------|----------------------------------|-----------------------------------|-----------------------------------|----------|---------------------------|
| <b>Survey completed *</b>                                                                                                                     | 202 (98.5%)                      | 54 (98.2%)                        | 148 (98.7%)                       | -        | 205                       |
| <b>Consultation for the announcement of cancer's treatment</b>                                                                                |                                  |                                   |                                   |          |                           |
| <b>1. Length of the consultation - minutes<sup>S</sup></b>                                                                                    | 30.0 [25.0;35.0]                 | 30.0 [20.0;35.0]                  | 30.0 [25.0;36.2]                  | 0.06     | 197                       |
| <b>2. Patient accompanied during the consultation*</b>                                                                                        |                                  |                                   |                                   |          |                           |
| No; alone during the consultation                                                                                                             | 98 (48.5%)                       | 21 (38.9%)                        | 77 (52.0%)                        | 0.19     | 202                       |
| Yes, by their spouse or another family member                                                                                                 | 102 (50.5%)                      | 33 (61.1%)                        | 69 (46.6%)                        |          |                           |
| Yes, by a friend                                                                                                                              | 2 (1.0%)                         | 0 (0%)                            | 2 (1.4%)                          |          |                           |
| <b>3. Presence of a dedicated nurse during the consultation*</b>                                                                              |                                  |                                   |                                   |          |                           |
| During the consultation                                                                                                                       | 46 (22.8%)                       | 16 (29.6%)                        | 30 (20.3%)                        | 0.001    | 202                       |
| After the consultation only                                                                                                                   | 95 (47.0%)                       | 14 (25.9%)                        | 81 (54.7%)                        |          |                           |
| No consultation nurse                                                                                                                         | 61 (30.2%)                       | 24 (44.4%)                        | 37 (25.0%)                        |          |                           |
| <b>4. Do you feel you had enough time to discuss your patient's illness? **</b>                                                               |                                  |                                   |                                   |          |                           |
| Yes, completely                                                                                                                               | 91 (45.0%)                       | 28 (51.9%)                        | 63 (42.6%)                        | 0.26     | 202                       |
| Yes, somewhat                                                                                                                                 | 100 (49.5%)                      | 22 (40.7%)                        | 78 (52.7%)                        |          |                           |
| No, not really                                                                                                                                | 11 (5.4%)                        | 4 (7.4%)                          | 7 (4.7%)                          |          |                           |
| No, not at all                                                                                                                                | 0 (0%)                           | 0 (0%)                            | 0 (0%)                            |          |                           |
| <b>5. Do you think the patient understood what their treatment will involve based on the explanations you provided and the terms used? **</b> |                                  |                                   |                                   |          |                           |
| Yes, completely                                                                                                                               | 56 (27.7%)                       | 18 (33.3%)                        | 38 (25.7%)                        | 0.14     | 202                       |
| Yes, somewhat                                                                                                                                 | 129 (63.9%)                      | 29 (53.7%)                        | 100 (67.6%)                       |          |                           |
| No, not really                                                                                                                                | 17 (8.4%)                        | 7 (13.0%)                         | 10 (6.8%)                         |          |                           |
| No, not at all                                                                                                                                | 0 (0%)                           | 0 (0%)                            | 0 (0%)                            |          |                           |
| <b>6. Do you think you were attentive enough to all the requests the patient wanted to express? **</b>                                        |                                  |                                   |                                   |          |                           |
| Yes, completely                                                                                                                               | 64 (31.7%)                       | 27 (50.0%)                        | 37 (25.0%)                        | 0.002    | 202                       |
| Yes, somewhat                                                                                                                                 | 132 (65.3%)                      | 25 (46.3%)                        | 107 (72.3%)                       |          |                           |
| No, not really                                                                                                                                | 6 (3.0%)                         | 2 (3.7%)                          | 4 (2.7%)                          |          |                           |
| No, not at all                                                                                                                                | 0 (0%)                           | 0 (0%)                            | 0 (0%)                            |          |                           |
| <b>7. How did you inform the patient about the possibility of experiencing side effects related to the prescribed treatment? **</b>           |                                  |                                   |                                   |          |                           |
| In detail                                                                                                                                     | 81 (40.5%)                       | 29 (54.7%)                        | 52 (35.4%)                        | 0.03     | 200                       |
| Partially, briefly                                                                                                                            | 113 (56.5%)                      | 24 (45.3%)                        | 89 (60.5%)                        |          |                           |
| I did not mention it                                                                                                                          | 6 (3.0%)                         | 0 (0%)                            | 6 (4.1%)                          |          |                           |
| <b>8. Did you provide an estimation of life expectancy? **</b>                                                                                |                                  |                                   |                                   |          |                           |
| Yes, precisely                                                                                                                                | 13 (6.5%)                        | 5 (9.4%)                          | 8 (5.4%)                          | 0.001    | 201                       |
| Yes, vaguely                                                                                                                                  | 87 (43.3%)                       | 33 (62.3%)                        | 54 (36.5%)                        |          |                           |
| No, not at all                                                                                                                                | 101 (50.2%)                      | 15 (28.3%)                        | 86 (58.1%)                        |          |                           |
| <b>9. Do you think the patient trusts your judgment and the treatment you have proposed? **</b>                                               |                                  |                                   |                                   |          |                           |
| Yes, completely                                                                                                                               | 50 (25.0%)                       | 24 (45.3%)                        | 26 (17.7%)                        | <0.001   | 200                       |

|                                                                                                                                                                             | Total<br>N= 205 patients | Belgium<br>N= 55 patients | France<br>N= 150 patients | p      | Available<br>data |
|-----------------------------------------------------------------------------------------------------------------------------------------------------------------------------|--------------------------|---------------------------|---------------------------|--------|-------------------|
| Yes, somewhat                                                                                                                                                               | 141 (70.5%)              | 27 (50.9%)                | 114 (77.6%)               |        |                   |
| No, not really                                                                                                                                                              | 4 (2.0%)                 | 0 (0%)                    | 4 (2.7%)                  |        |                   |
| No, not at all                                                                                                                                                              | 1 (0.5%)                 | 0 (0%)                    | 1 (0.7%)                  |        |                   |
| I don't know                                                                                                                                                                | 4 (2.0%)                 | 2 (3.8%)                  | 2 (1.4%)                  |        |                   |
| <b>Understanding of the illness</b>                                                                                                                                         |                          |                           |                           |        |                   |
| <b>1. In your opinion, which option best corresponds to your patient's perception of their illness?*</b>                                                                    |                          |                           |                           |        |                   |
| Accurate perception of the diagnosis                                                                                                                                        | 74 (36.8%)               | 11 (20.8%)                | 63 (42.6%)                | 0.01   | 201               |
| Partially accurate perception                                                                                                                                               | 122 (60.7%)              | 40 (75.5%)                | 82 (55.4%)                |        |                   |
| Inaccurate perception of the diagnosis                                                                                                                                      | 5 (2.5%)                 | 2 (3.8%)                  | 3 (2.0%)                  |        |                   |
| <b>2. Do you think your patient has realistic expectations regarding the prescribed treatment?*</b>                                                                         |                          |                           |                           |        |                   |
| Yes                                                                                                                                                                         | 158 (78.6%)              | 31 (58.5%)                | 127 (85.8%)               | <0.001 | 201               |
| <b>3. Do you think the patient's perception of the progression of their illness and overall condition over the next 12 months is realistic? *</b>                           |                          |                           |                           |        |                   |
| Yes                                                                                                                                                                         | 119 (61.0%)              | 27 (50.9%)                | 92 (64.8%)                | 0.11   | 195               |
| <b>4. In your opinion, what is the life expectancy of the patient? **</b>                                                                                                   |                          |                           |                           |        |                   |
| more than 5 years                                                                                                                                                           | 0 (0%)                   | 0 (0%)                    | 0 (0%)                    | 0.04   | 201               |
| Between 2 à 5 years                                                                                                                                                         | 43 (21.4%)               | 16 (30.2%)                | 27 (18.2%)                |        |                   |
| Between 1 à 2 years                                                                                                                                                         | 109 (54.2%)              | 30 (56.6%)                | 79 (53.4%)                |        |                   |
| Less than 1 year                                                                                                                                                            | 49 (24.4%)               | 7 (13.2%)                 | 42 (28.4%)                |        |                   |
| <b>5. In your opinion, what is the likelihood that your patient will be alive in 2 years? *</b>                                                                             |                          |                           |                           |        |                   |
| 100%                                                                                                                                                                        | 0 (0%)                   | 0 (0%)                    | 0 (0%)                    | <0.001 | 202               |
| 75 to 100%                                                                                                                                                                  | 13 (6.4%)                | 9 (16.7%)                 | 4 (2.7%)                  |        |                   |
| 50 to 75%                                                                                                                                                                   | 43 (21.3%)               | 17 (31.5%)                | 26 (17.6%)                |        |                   |
| 25 to 50%                                                                                                                                                                   | 63 (31.2%)               | 16 (29.6%)                | 47 (31.8%)                |        |                   |
| 0 to 50%                                                                                                                                                                    | 83 (41.1%)               | 12 (22.2%)                | 71 (48.0%)                |        |                   |
| <b>Predicted survival of your patient in months<sup>s</sup></b>                                                                                                             | 17.0 [12.0;21.5]         | 18.0 [12.0;23.5]          | 16.0 [10.0;20.0]          | 0.12   | 198               |
| <b>7. In your opinion, what is the probability that the treatment you prescribed will control (at least temporarily) the disease? ** %</b>                                  |                          |                           |                           |        |                   |
| 0%                                                                                                                                                                          | 1 (0.5%)                 | 0 (0%)                    | 1 (0.7%)                  | <0.001 | 202               |
| Between 0 and 25%                                                                                                                                                           | 64 (31.7%)               | 4 (7.4%)                  | 60 (40.5%)                |        |                   |
| Between 25 and 50%                                                                                                                                                          | 64 (31.7%)               | 17 (31.5%)                | 47 (31.8%)                |        |                   |
| Between 50 and 75%                                                                                                                                                          | 66 (32.7%)               | 29 (53.7%)                | 37 (25.0%)                |        |                   |
| Between 75 and 100%                                                                                                                                                         | 6 (3.0%)                 | 3 (5.6%)                  | 3 (2.0%)                  |        |                   |
| 100%                                                                                                                                                                        | 1 (0.5%)                 | 1 (1.9%)                  | 0 (0%)                    |        |                   |
| <b>8. What is the percentage chance that the treatment you prescribed will cause disabling side effects (such as diarrhea, vomiting, significant fatigue, pain...)? **%</b> |                          |                           |                           |        |                   |
| 0%                                                                                                                                                                          | 2 (1.0%)                 | 0 (0%)                    | 2 (1.4%)                  | 0.31   | 202               |
| Between 0 and 25%                                                                                                                                                           | 111 (55.0%)              | 27 (50.0%)                | 84 (56.8%)                |        |                   |
| Between 25 and 50%                                                                                                                                                          | 73 (36.1%)               | 20 (37.0%)                | 53 (35.8%)                |        |                   |
| Between 50 and 75%                                                                                                                                                          | 15 (7.4%)                | 6 (11.1%)                 | 9 (6.1%)                  |        |                   |

|                                                                                                                        | <b>Total<br/>N= 205 patients</b> | <b>Belgium<br/>N= 55 patients</b> | <b>France<br/>N= 150 patients</b> | <b>p</b> | <b>Available<br/>data</b> |
|------------------------------------------------------------------------------------------------------------------------|----------------------------------|-----------------------------------|-----------------------------------|----------|---------------------------|
| Between 75 and 100%                                                                                                    | 1 (0.5%)                         | 1 (1.9%)                          | 0 (0%)                            |          |                           |
| 100%                                                                                                                   | 0 (0%)                           | 0 (0%)                            | 0 (0%)                            |          |                           |
| <b>9. Do you believe that for your patient, maintaining quality of life is more important than prolonging life? **</b> |                                  |                                   |                                   |          |                           |
| Yes, absolutely                                                                                                        | 55 (27.2%)                       | 10 (18.5%)                        | 45 (30.4%)                        | <0.001   | 202                       |
| Yes, to some extent                                                                                                    | 90 (44.6%)                       | 26 (48.1%)                        | 64 (43.2%)                        |          |                           |
| No, probably not                                                                                                       | 36 (17.8%)                       | 4 (7.4%)                          | 32 (21.6%)                        |          |                           |
| No, not at all                                                                                                         | 7 (3.5%)                         | 2 (3.7%)                          | 5 (3.4%)                          |          |                           |
| I don't know                                                                                                           | 14 (6.9%)                        | 12 (22.2%)                        | 2 (1.4%)                          |          |                           |

\*numbers (percentage) § median (interquartile range)

% These 10 questions are used to assess the concordance between the patients and the physicians

**Table S3: Results of the Hospital Anxiety and Depression scale (HADS) survey**

|                                                                                        | <b>Total<br/>N= 200 patients</b> | <b>Belgium<br/>N= 50 patients</b> | <b>France<br/>N= 150 patients</b> | <b>Available<br/>data</b> |
|----------------------------------------------------------------------------------------|----------------------------------|-----------------------------------|-----------------------------------|---------------------------|
| <b>HADS survey completed*</b>                                                          | 202 (98.5%)                      | 55 (100.0%)                       | 147 (98.0%)                       | -                         |
| <b>1. I feel tense or 'wound up'</b> *                                                 |                                  |                                   |                                   |                           |
| Most of the time                                                                       | 19 (9.5%)                        | 5 (9.4%)                          | 14 (9.5%)                         | 200                       |
| A lot of the time                                                                      | 27 (13.5%)                       | 11 (20.8%)                        | 16 (10.9%)                        |                           |
| Occasionally                                                                           | 106 (53.0%)                      | 19 (35.8%)                        | 87 (59.2%)                        |                           |
| Not at all                                                                             | 48 (24.0%)                       | 18 (34.0%)                        | 30 (20.4%)                        |                           |
| <b>2. I still enjoy the things I used to enjoy*</b>                                    |                                  |                                   |                                   |                           |
| Definitely as much                                                                     | 97 (48.5%)                       | 28 (52.8%)                        | 69 (46.9%)                        | 200                       |
| Not quite so much                                                                      | 76 (38.0%)                       | 22 (41.5%)                        | 54 (36.7%)                        |                           |
| Only a little                                                                          | 18 (9.0%)                        | 2 (3.8%)                          | 16 (10.9%)                        |                           |
| Hardly at all                                                                          | 9 (4.5%)                         | 1 (1.9%)                          | 8 (5.4%)                          |                           |
| <b>3. I get a sort of frightened feeling as if something awful is about to happen*</b> |                                  |                                   |                                   |                           |
| Very definitely & quite badly                                                          | 37 (18.7%)                       | 9 (17.3%)                         | 28 (19.2%)                        | 198                       |
| Yes, but not too badly                                                                 | 36 (18.2%)                       | 10 (19.2%)                        | 26 (17.8%)                        |                           |
| A little, but it doesn't worry me                                                      | 68 (34.3%)                       | 16 (30.8%)                        | 52 (35.6%)                        |                           |
| Not at all                                                                             | 57 (28.8%)                       | 17 (32.7%)                        | 40 (27.4%)                        |                           |
| <b>4. I can laugh and see the funny side of things*</b>                                |                                  |                                   |                                   |                           |
| As much as always                                                                      | 108 (54.5%)                      | 30 (56.6%)                        | 78 (53.8%)                        | 198                       |
| Not quite so much now                                                                  | 58 (29.3%)                       | 16 (30.2%)                        | 42 (29.0%)                        |                           |
| Definitely not so much now                                                             | 29 (14.6%)                       | 6 (11.3%)                         | 23 (15.9%)                        |                           |
| Not at all                                                                             | 3 (1.5%)                         | 1 (1.9%)                          | 2 (1.4%)                          |                           |
| <b>5. Worrying thoughts go through my mind*</b>                                        |                                  |                                   |                                   |                           |
| A great deal of the time                                                               | 30 (15.5%)                       | 14 (28.0%)                        | 16 (11.1%)                        | 194                       |
| A lot of the time                                                                      | 43 (22.2%)                       | 7 (14.0%)                         | 36 (25.0%)                        |                           |
| Not too often                                                                          | 58 (29.9%)                       | 13 (26.0%)                        | 45 (31.2%)                        |                           |
| Very little                                                                            | 63 (32.5%)                       | 16 (32.0%)                        | 47 (32.6%)                        |                           |
| <b>6. I feel cheerful *</b>                                                            |                                  |                                   |                                   |                           |
| Never                                                                                  | 1 (0.5%)                         | 1 (1.9%)                          | 0 (0.0%)                          | 198                       |
| Not often                                                                              | 16 (8.1%)                        | 4 (7.5%)                          | 12 (8.3%)                         |                           |
| Sometimes                                                                              | 32 (16.2%)                       | 7 (13.2%)                         | 25 (17.2%)                        |                           |
| Most of the time                                                                       | 149 (75.3%)                      | 41 (77.4%)                        | 108 (74.5%)                       |                           |
| <b>7. I can sit at ease and feel relaxed*</b>                                          |                                  |                                   |                                   |                           |
| Definitely                                                                             | 95 (48.0%)                       | 27 (50.9%)                        | 68 (46.9%)                        | 198                       |
| Usually                                                                                | 75 (37.9%)                       | 20 (37.7%)                        | 55 (37.9%)                        |                           |
| Not often                                                                              | 21 (10.6%)                       | 4 (7.5%)                          | 17 (11.7%)                        |                           |
| Not at all                                                                             | 7 (3.5%)                         | 2 (3.8%)                          | 5 (3.4%)                          |                           |
| <b>8. I feel as if I am slowed down*</b>                                               |                                  |                                   |                                   |                           |
| Nearly all the time                                                                    | 18 (9.1%)                        | 5 (9.4%)                          | 13 (9.0%)                         | 197                       |
| Very often                                                                             | 50 (25.4%)                       | 11 (20.8%)                        | 39 (27.1%)                        |                           |
| Sometimes                                                                              | 78 (39.6%)                       | 17 (32.1%)                        | 61 (42.4%)                        |                           |
| Not at all                                                                             | 51 (25.9%)                       | 20 (37.7%)                        | 31 (21.5%)                        |                           |

|                                                                                 | <b>Total<br/>N= 200 patients</b> | <b>Belgium<br/>N= 50 patients</b> | <b>France<br/>N= 150 patients</b> | <b>Available<br/>data</b> |
|---------------------------------------------------------------------------------|----------------------------------|-----------------------------------|-----------------------------------|---------------------------|
| <b>9. I get a sort of frightened feeling like 'butterflies' in the stomach*</b> |                                  |                                   |                                   |                           |
| Not at all                                                                      | 91 (46.4%)                       | 24 (45.3%)                        | 67 (46.9%)                        | 196                       |
| Occasionally                                                                    | 88 (44.9%)                       | 26 (49.1%)                        | 62 (43.4%)                        |                           |
| Quite often                                                                     | 11 (5.6%)                        | 2 (3.8%)                          | 9 (6.3%)                          |                           |
| Very often                                                                      | 6 (3.1%)                         | 1 (1.9%)                          | 5 (3.5%)                          |                           |
| <b>10. I have lost interest in my appearance*</b>                               |                                  |                                   |                                   |                           |
| Definitely                                                                      | 17 (8.6%)                        | 7 (13.2%)                         | 10 (6.9%)                         | 197                       |
| I don't take as much care as I should                                           | 28 (14.2%)                       | 9 (17.0%)                         | 19 (13.2%)                        |                           |
| I may not take as much care                                                     | 52 (26.4%)                       | 7 (13.2%)                         | 45 (31.2%)                        |                           |
| I take just as much care as ever                                                | 100 (50.8%)                      | 30 (56.6%)                        | 70 (48.6%)                        |                           |
| <b>11. I feel restless as if I have to be on the move</b>                       |                                  |                                   |                                   |                           |
| Very much indeed                                                                | 21 (10.7%)                       | 6 (11.3%)                         | 15 (10.5%)                        | 196                       |
| Quite a lot                                                                     | 33 (16.8%)                       | 11 (20.8%)                        | 22 (15.4%)                        |                           |
| Not very much                                                                   | 75 (38.3%)                       | 15 (28.3%)                        | 60 (42.0%)                        |                           |
| Not at all                                                                      | 67 (34.2%)                       | 21 (39.6%)                        | 46 (32.2%)                        |                           |
| <b>12. I look forward to enjoyment to things*</b>                               |                                  |                                   |                                   |                           |
| As much as I ever did                                                           | 76 (39.2%)                       | 20 (40.0%)                        | 56 (38.9%)                        | 194                       |
| Rather less than I used to                                                      | 79 (40.7%)                       | 21 (42.0%)                        | 58 (40.3%)                        |                           |
| Definitely less than I used to                                                  | 28 (14.4%)                       | 7 (14.0%)                         | 21 (14.6%)                        |                           |
| Hardly at all                                                                   | 11 (5.7%)                        | 2 (4.0%)                          | 9 (6.2%)                          |                           |
| <b>13. I get sudden feelings of panic*</b>                                      |                                  |                                   |                                   |                           |
| Very often indeed                                                               | 1 (0.5%)                         | 1 (1.9%)                          | 0 (0.0%)                          | 198                       |
| Quite often                                                                     | 20 (10.1%)                       | 5 (9.6%)                          | 15 (10.3%)                        |                           |
| Not very often                                                                  | 62 (31.3%)                       | 16 (30.8%)                        | 46 (31.5%)                        |                           |
| Not at all                                                                      | 115 (58.1%)                      | 30 (57.7%)                        | 85 (58.2%)                        |                           |
| <b>14. I can enjoy a good book or radio or TV program*</b>                      |                                  |                                   |                                   |                           |
| Often                                                                           | 137 (69.2%)                      | 37 (71.2%)                        | 100 (68.5%)                       | 198                       |
| Sometimes                                                                       | 44 (22.2%)                       | 10 (19.2%)                        | 34 (23.3%)                        |                           |
| Not often                                                                       | 8 (4.0%)                         | 3 (5.8%)                          | 5 (3.4%)                          |                           |
| Very seldom                                                                     | 9 (4.5%)                         | 2 (3.8%)                          | 7 (4.8%)                          |                           |
| <b>HADS score (anxiety)<sup>§</sup></b>                                         | 6.0 [4.0;9.0]                    | 6.0 [3.0;10.0]                    | 6.0 [4.0;9.0]                     | 188                       |
| <b>HADS score (depression)<sup>§</sup></b>                                      | 4.0 [2.0;7.2]                    | 4.0 [1.2;7.0]                     | 5.0 [3.0;7.8]                     | 192                       |
| <b>HADS score (total)<sup>§</sup></b>                                           | 11.0 [7.0;16.0]                  | 10.5 [5.2;16.8]                   | 11.0 [7.0;15.0]                   | 185                       |
| <b>HADS score by category*</b>                                                  |                                  |                                   |                                   |                           |
| No symptoms (0 to 7)                                                            | 58 (31.4%)                       | 16 (34.8%)                        | 42 (30.2%)                        | 185                       |
| Doubtful symptoms (8 to 10)                                                     | 30 (16.2%)                       | 7 (15.2%)                         | 23 (16.5%)                        |                           |
| Certain symptoms (11 to more)                                                   | 97 (52.4%)                       | 23 (50.0%)                        | 74 (53.2%)                        |                           |

\*numbers (percentage) <sup>§</sup> median (interquartile range), HADS = Hospital Anxiety and Depression Scale



**Table S4: Association between patient's factors and HADS using multivariate linear regression**

|                                              | <b><math>\beta \pm SE</math></b> | <b>p</b>    |
|----------------------------------------------|----------------------------------|-------------|
| Country – France (ref : Belgium)             | 0.24 $\pm$ 1.01                  | 0.81        |
| Non tumor fibrosis F2/F3 (ref : F0/F1)       | 2.26 $\pm$ 1.83                  | 0.22        |
| Non tumor fibrosis F4                        | 1.70 $\pm$ 1.17                  | 0.15        |
| Serum AFP level (logarithmic)                | 0.34 $\pm$ 0.15                  | <b>0.03</b> |
| Performance status 1/2 (ref : 0)             | 1.34 $\pm$ 0.94                  | 0.15        |
| Unemployed (Job seeker) (ref: active worker) | 2.76 $\pm$ 2.18                  | 0.21        |
| Unable to work, disabled                     | 3.63 $\pm$ 1.81                  | <b>0.04</b> |
| Retired                                      | 1.08 $\pm$ 1.28                  | 0.40        |

AFP= alpha foetoprotein, Ref = reference, SE= standard error of coefficients

**Table S5: Multivariate linear mixed-effects model of baseline factors associated with predicted death.**

|                                                                                                | $\beta \pm SE$   | <b>p</b>     |
|------------------------------------------------------------------------------------------------|------------------|--------------|
| Gender of the patient (Female) (ref : Male)                                                    | 3.57 $\pm$ 1.43  | <b>0.02</b>  |
| Age of the patient (years old)                                                                 | 0.07 $\pm$ 0.05  | 0.14         |
| Non tumor fibrosis F2/F3 (ref : F0/F1)                                                         | 0.64 $\pm$ 2.08  | 0.76         |
| Non tumor fibrosis F4                                                                          | -1.37 $\pm$ 1.36 | 0.31         |
| BCLC C (ref : BCLC B)                                                                          | -2.48 $\pm$ 1.21 | <b>0.04</b>  |
| Child Pugh score – B (ref : A)                                                                 | -1.87 $\pm$ 1.30 | 0.15         |
| Serum AFP level (logarithmic)                                                                  | -0.39 $\pm$ 0.15 | <b>0.01</b>  |
| Performance status – 1/2 (ref : 0)                                                             | -2.95 $\pm$ 1.04 | <b>0.005</b> |
| Previous treatment for HCC – Yes (ref : No)                                                    | 1.11 $\pm$ 1.06  | 0.29         |
| Numbers of patients treated for HCC each year by the doctor between 50 and 100 (ref $\leq$ 50) | 2.97 $\pm$ 2.01  | 0.15         |
| Numbers of patients treated for HCC each year by the doctor > 100                              | 1.49 $\pm$ 2.14  | 0.49         |

AFP= alpha foetoprotein, BCLC = Barcelona clinic cancer, HCC = hepatocellular carcinoma, Ref = reference, SE= standard error of coefficients

**Table S6: Baseline factors associated with observed death using Cox proportional hazards model**

|                                          | <b>HR [95%CI]</b>   | <b>p</b>          |
|------------------------------------------|---------------------|-------------------|
| Country – France (ref : Belgium)         | 0.80 [0.50-1.30]    | 0.37              |
| BCLC C (ref : BCLC B)                    | 1.91 [1.16-3.13]    | <b>0.01</b>       |
| Child Pugh score – B (ref : A)           | 1.86 [1.15-3.01]    | <b>0.01</b>       |
| Serum AFP level (logarithmic)            | 1.03 [0.97-1.09]    | 0.36              |
| Performance status – 1/2 (ref : 0)       | 1.67 [1.12-2.47]    | <b>0.01</b>       |
| Type of treatment – Sorafenib            | 22.77 [5.08-102.12] | <b>&lt; 0.001</b> |
| HADS score total                         | 1.02 [0.99-1.05]    | 0.26              |
| Married, in a relationship (ref: Single) | 0.65 [0.38-1.13]    | 0.13              |
| Divorced, separated                      | 1.40 [0.68-2.89]    | 0.36              |
| Widowed                                  | 0.91 [0.42-1.96]    | 0.81              |

AFP= alpha foetoprotein, BCLC = Barcelona clinic cancer, HADS = Hospital Anxiety and Depression Scale, HR= Hazard Ratio, 95% CI = 95% confidence interval

**Table S7: correlation between results of HADS survey with the answers to the patient's survey using multivariate linear regression**

|                                                                                                                             | Total           | $\beta \pm SE$     | P value   |
|-----------------------------------------------------------------------------------------------------------------------------|-----------------|--------------------|-----------|
|                                                                                                                             | N= 205 patients |                    |           |
| <b>Socio-cultural level and lifestyle</b>                                                                                   |                 |                    |           |
| <b>1. What is your marital/family status?</b>                                                                               |                 |                    |           |
| Single                                                                                                                      | 26 (13.0%)      | reference          | reference |
| Married, in a relationship                                                                                                  | 130 (65.0%)     | -0.127 $\pm$ 1.363 | > 0,9     |
| Divorced, separated                                                                                                         | 23 (11.5%)      | 0.785 $\pm$ 1.832  | 0.67      |
| Widowed                                                                                                                     | 21 (10.5%)      | 1.493 $\pm$ 1.857  | 0.42      |
| <b>2. At home, do you live?</b>                                                                                             |                 |                    |           |
| Alone                                                                                                                       | 47 (23.5%)      | reference          | reference |
| With someone constantly                                                                                                     | 141 (70.5%)     | -1.029 $\pm$ 1.081 | 0.34      |
| With someone intermittently present                                                                                         | 12 (6.0%)       | -1.666 $\pm$ 2.101 | 0.43      |
| <b>3. Regarding your education, what is the highest level of your degree?</b>                                               |                 |                    |           |
| Primary school                                                                                                              | 47 (24.0%)      |                    |           |
| High school : general education                                                                                             | 52 (26.5%)      | 1.253 $\pm$ 1.309  | 0.34      |
| High school : vocational education                                                                                          | 61 (31.1%)      | 0.347 $\pm$ 1.224  | 0.78      |
| University or higher education                                                                                              | 36 (18.4%)      | -0.955 $\pm$ 1.392 | 0.49      |
| <b>4. What is your current employment status?</b>                                                                           |                 |                    |           |
| Active worker                                                                                                               | 32 (16.0%)      |                    |           |
| Unemployed (Job seeker)                                                                                                     | 11 (5.5%)       | 2.708 $\pm$ 2.218  | 0.22      |
| Unable to work, disabled                                                                                                    | 20 (10.0%)      | 3.676 $\pm$ 1.841  | 0.047     |
| Retired                                                                                                                     | 137 (68.5%)     | 0.795 $\pm$ 1.285  | 0.54      |
| <b>5. What is your current alcohol consumption?</b>                                                                         |                 |                    |           |
| Every day/every week                                                                                                        | 29 (14.5%)      |                    |           |
| Occasional (less than once per week)                                                                                        | 39 (19.5%)      | 0.43 $\pm$ 1.575   | 0.78      |
| Never                                                                                                                       | 132 (66.0%)     | -0.094 $\pm$ 1.332 | > 0,9     |
| <b>Consultation for the announcement of cancer's treatment</b>                                                              |                 |                    |           |
| <b>1. Did you have enough time to discuss your illness with your doctor? * %</b>                                            |                 |                    |           |
| Yes, completely                                                                                                             | 150 (74.6%)     | reference          | reference |
| Mostly yes                                                                                                                  | 44 (21.9%)      | 2.258 $\pm$ 1.077  | 0.04      |
| Mostly no + no, not at all                                                                                                  | 7 (3.5%)        | 3.344 $\pm$ 2.34   | 0.15      |
| <b>2. Did the doctor explain the type of treatment you will receive in a way that was understandable to you? * %</b>        |                 |                    |           |
| Yes, completely                                                                                                             | 172 (85.6%)     | reference          | reference |
| Mostly yes                                                                                                                  | 25 (12.4%)      | 2.229 $\pm$ 1.327  | 0.09      |
| Mostly no + no, not at all                                                                                                  | 4 (2.0%)        | 5.734 $\pm$ 2.97   | 0.05      |
| <b>3. Did the doctor listen to what you had to say? * %</b>                                                                 |                 |                    |           |
| Yes, completely                                                                                                             | 177 (88.1%)     | reference          | reference |
| Mostly yes                                                                                                                  | 23 (11.4%)      | 1.633 $\pm$ 1.377  | 0.24      |
| Mostly no + no, not at all                                                                                                  | 1 (0.5%)        | 0.875 $\pm$ 5.774  | 0.88      |
| <b>4. Did the doctor discuss the possibility of treatment-related side effects with you? * %</b>                            |                 |                    |           |
| Yes, in detail                                                                                                              | 161 (80.5%)     | reference          | reference |
| Yes, briefly                                                                                                                | 29 (14.5%)      | 0.561 $\pm$ 1.25   | 0.65      |
| No, not at all                                                                                                              | 10 (5.0%)       | 3.992 $\pm$ 1.9    | 0.04      |
| <b>5. Did the doctor discuss your life expectancy with you? * %</b>                                                         |                 |                    |           |
| Yes, in detail                                                                                                              | 37 (18.7%)      | reference          | reference |
| Yes, briefly                                                                                                                | 43 (21.7%)      | 1.201 $\pm$ 1.436  | 0.40      |
| No, not at all                                                                                                              | 118 (59.6%)     | -0.409 $\pm$ 1.225 | 0.74      |
| <b>6. Do you wish to have specific numerical information (in terms of months or percentage) about your life expectancy?</b> |                 |                    |           |
| Yes                                                                                                                         | 78 (39.0%)      | reference          | reference |
| No                                                                                                                          | 80 (40.0%)      | -3.654 $\pm$ 0.99  | < 0,001   |
| I don't know                                                                                                                | 42 (21.0%)      | -2.598 $\pm$ 1.168 | 0.03      |
| <b>7. Were you involved as much as you wanted in the choice of the proposed treatment?*</b>                                 |                 |                    |           |
| Yes, completely                                                                                                             | 104 (52.0%)     | reference          | reference |
| Mostly yes                                                                                                                  | 74 (37.0%)      | 0.502 $\pm$ 0.954  | 0.60      |
| Mostly no                                                                                                                   | 15 (7.5%)       | 3.077 $\pm$ 1.731  | 0.08      |

|                                                                                                                                                                                             |             |                |           |
|---------------------------------------------------------------------------------------------------------------------------------------------------------------------------------------------|-------------|----------------|-----------|
| No, not at all                                                                                                                                                                              | 6 (3.0%)    | 2.519 ± 2.467  | 0.31      |
| I did not wish to be involved                                                                                                                                                               | 1 (0.5%)    | 4.595 ± 5.675  | 0.42      |
| <b>8. Overall, how do you evaluate the quality of your consultation?*</b>                                                                                                                   |             |                |           |
| Excellent                                                                                                                                                                                   | 108 (54.3%) | reference      | reference |
| Very good                                                                                                                                                                                   | 81 (40.7%)  | 1.445 ± 0.937  | 0.12      |
| Average                                                                                                                                                                                     | 9 (4.5%)    | 2.313 ± 1.939  | 0.23      |
| Poor + very poor                                                                                                                                                                            | 1 (0.5%)    | -1.572 ± 5.657 | 0,78      |
| <b>9. Do you trust your doctor's judgment regarding the proposed treatment? * #</b>                                                                                                         |             |                |           |
| Yes, completely                                                                                                                                                                             | 171 (85.5%) | reference      | reference |
| Mostly yes                                                                                                                                                                                  | 28 (14.0%)  | 4.151 ± 1.232  | 0.0009    |
| Mostly no + no, not at all                                                                                                                                                                  | 1 (0.5%)    | 0.487 ± 5.392  | > 0,9     |
| <b>Understanding of the disease</b>                                                                                                                                                         |             |                |           |
| <b>1. How do you assess your current health status?</b>                                                                                                                                     |             |                |           |
| I feel healthy despite my illness, and I hope to recover                                                                                                                                    | 125 (62.8%) | reference      | reference |
| I feel healthy despite my illness, but I won't be able to recover                                                                                                                           | 43 (21.6%)  | 3.352 ± 1.033  | 0.001     |
| I feel very sick due to my illness, but I hope to recover                                                                                                                                   | 21 (10.6%)  | 6.362 ± 1.407  | < 0,001   |
| I feel very sick due to my illness, and I won't be able to recover                                                                                                                          | 6 (3.0%)    | 9.247 ± 2.409  | 0.0002    |
| I have no opinion                                                                                                                                                                           | 4 (2.0%)    | 6.353 ± 2.944  | 0.03      |
| <b>2. In your opinion, what is the stage of your cancer?</b>                                                                                                                                |             |                |           |
| I do not have cancer                                                                                                                                                                        | 2 (1.0%)    | reference      | reference |
| Early, very localized cancer                                                                                                                                                                | 27 (13.5%)  | 0.319 ± 4.613  | > 0,9     |
| Intermediate stage cancer                                                                                                                                                                   | 64 (32.0%)  | 1.742 ± 4.519  | 0.70      |
| Advanced stage cancer                                                                                                                                                                       | 56 (28.0%)  | 2.819 ± 4.528  | 0.53      |
| I don't know                                                                                                                                                                                | 51 (25.5%)  | 2.313 ± 4.544  | 0.61      |
| <b>3. In your opinion, what could be the impact of the illness in terms of life expectancy? %</b>                                                                                           |             |                |           |
| I have a life expectancy of more than 5 years                                                                                                                                               | 100 (63.3%) | reference      | reference |
| I have a life expectancy of 2 to 5 years                                                                                                                                                    | 37 (23.4%)  | 2.04 ± 1.149   | 0.08      |
| I have a life expectancy of less than 2 years                                                                                                                                               | 21 (13.3%)  | 3.14 ± 1.354   | 0.02      |
| <b>Understanding of the treatment</b>                                                                                                                                                       |             |                |           |
| <b>1. Among the following options, which one best corresponds to what your doctor told you during the consultation regarding your treatment– N(%)</b>                                       |             |                |           |
| My cancer will be cured                                                                                                                                                                     | 15 (7.5%)   | reference      | reference |
| My cancer can be cured if the treatment works                                                                                                                                               | 89 (44.5%)  | 3.683 ± 1.739  | 0.04      |
| My cancer cannot be cured, but we will try to control the disease with treatment                                                                                                            | 70 (35.0%)  | 5.397 ± 1.779  | 0.003     |
| I don't know                                                                                                                                                                                | 15 (7.5%)   | 6.453 ± 2.006  | 0.002     |
| <b>2. What percentage chance do you believe there is that your treatment will shrink or stop the progression of your cancer? %</b>                                                          |             |                |           |
| Between 0 and 25%                                                                                                                                                                           | 13 (7.3%)   | reference      | reference |
| Between 25 and 50%                                                                                                                                                                          | 41 (23.0%)  | 1.64 ± 2.241   | 0.47      |
| Between 50 and 75%                                                                                                                                                                          | 50 (28.1%)  | 0.503 ± 1.994  | 0.80      |
| Between 75 and 100%                                                                                                                                                                         | 43 (24.2%)  | -0.748 ± 2.072 | 0.72      |
| 100%                                                                                                                                                                                        | 31 (17.4%)  | -2.217 ± 2.22  | 0,32      |
| <b>3. Is maintaining your quality of life more important to you than living longer?– N(%)</b>                                                                                               |             |                |           |
| Yes, completely                                                                                                                                                                             | 73 (37.2%)  | reference      | reference |
| Mostly yes                                                                                                                                                                                  | 81 (41.3%)  | 1.725 ± 1.009  | 0.09      |
| Mostly no                                                                                                                                                                                   | 31 (15.8%)  | 0.225 ± 1.351  | 0.87      |
| No, not at all                                                                                                                                                                              | 11 (5.6%)   | -2.175 ± 2.035 | 0.29      |
| <b>4. What percentage chance do you believe there is that the treatment will cause disabling side effects (such as diarrhea, vomiting, significant fatigue, pain...)?– N(%)<sup>%</sup></b> |             |                |           |
| 0%                                                                                                                                                                                          | 16 (8.7%)   | reference      | reference |
| Between 0 and 25%                                                                                                                                                                           | 64 (35.0%)  | 1.856 ± 1.719  | 0.28      |
| Between 25 and 50%                                                                                                                                                                          | 71 (38.8%)  | 4.354 ± 1.687  | 0.01      |
| Between 50 and 75%                                                                                                                                                                          | 28 (15.3%)  | 3.654 ± 1.928  | 0.06      |
| Between 75 and 100%                                                                                                                                                                         | 4 (2.1%)    | 7.591 ± 3.574  | 0.04      |
| <b>5. From how many months of life expectancy gain are you willing to accept significant side effects (such as nausea/vomiting, significant fatigue, or pain)?– N(%)<sup>%</sup></b>        |             |                |           |
| 0 to 3 months                                                                                                                                                                               | 37 (22.4%)  | reference      | reference |
| 3 to 6 months                                                                                                                                                                               | 21 (12.7%)  | 1.335 ± 1.669  | 0.43      |
| 6 to 12 months                                                                                                                                                                              | 28 (17.0%)  | 0.006 ± 1.611  | > 0,9     |
| 12 to 24 months                                                                                                                                                                             | 25 (15.2%)  | 0.401 ± 1.648  | 0.81      |
| > 24 months                                                                                                                                                                                 | 54 (32.7%)  | 0.267 ± 1.29   | 0.84      |

|                                                                                                                                             |            |                |           |
|---------------------------------------------------------------------------------------------------------------------------------------------|------------|----------------|-----------|
| <b>6. I would like to try treatments for my cancer if they can make me live longer, even if it is very likely that they:</b>                |            |                |           |
| <b>6.1- Present a high level of side effects (such as nausea/vomiting, significant fatigue, or pain)– N(%)</b>                              |            |                |           |
| Completely agree                                                                                                                            | 47 (23.9%) | reference      | reference |
| Agree                                                                                                                                       | 76 (38.6%) | 1.379 ± 1.154  | 0.23      |
| Disagree                                                                                                                                    | 27 (13.7%) | 2.373 ± 1.508  | 0.12      |
| Strongly disagree                                                                                                                           | 7 (3.6%)   | 0.685 ± 2.532  | 0.79      |
| No opinion                                                                                                                                  | 40 (20.3%) | -1.509 ± 1.323 | 0.26      |
| <b>6.2- Require me to be bedridden and render me unable to use the bathroom or toilet without assistance – N(%)</b>                         |            |                |           |
| Completely agree                                                                                                                            | 15 (7.8%)  | reference      | reference |
| Agree                                                                                                                                       | 27 (14.0%) | 3.469 ± 2.018  | 0.09      |
| Disagree                                                                                                                                    | 59 (30.6%) | 2.579 ± 1.775  | 0.15      |
| Strongly disagree                                                                                                                           | 54 (28.0%) | 4.555 ± 1.842  | 0.01      |
| No opinion                                                                                                                                  | 38 (19.7%) | 1.962 ± 1.895  | 0.30      |
| <b>6.3- Require me to rely on help from my family and friends to carry out daily activities (such as shopping and managing money)– N(%)</b> |            |                |           |
| Completely agree                                                                                                                            | 29 (15.0%) | reference      | reference |
| Agree                                                                                                                                       | 60 (31.1%) | 1.22 ± 1.402   | 0.39      |
| Disagree                                                                                                                                    | 39 (20.2%) | -0.468 ± 1.494 | 0.75      |
| Strongly disagree                                                                                                                           | 36 (18.7%) | 2.758 ± 1.606  | 0.09      |
| No opinion                                                                                                                                  | 29 (15.0%) | -1.137 ± 1.646 | 0.49      |
| <b>6.4- Impair my memory or concentration – N(%)</b>                                                                                        |            |                |           |
| Completely agree                                                                                                                            | 15 (7.9%)  | reference      | reference |
| Agree                                                                                                                                       | 44 (23.0%) | 2.941 ± 1.806  | 0.11      |
| Disagree                                                                                                                                    | 56 (29.3%) | 2.515 ± 1.768  | 0.16      |
| Strongly disagree                                                                                                                           | 33 (17.3%) | 4.632 ± 1.892  | 0.02      |
| No opinion                                                                                                                                  | 43 (22.5%) | 1.233 ± 1.847  | 0.51      |
| <b>6.5- Make me occasionally confused and disoriented – N(%)</b>                                                                            |            |                |           |
| Completely agree                                                                                                                            | 16 (8.6%)  | reference      | reference |
| Agree                                                                                                                                       | 40 (21.4%) | 4.042 ± 1.823  | 0.03      |
| Disagree                                                                                                                                    | 51 (27.3%) | 2.089 ± 1.763  | 0.24      |
| Strongly disagree                                                                                                                           | 34 (18.2%) | 3.204 ± 1.902  | 0.09      |
| No opinion                                                                                                                                  | 46 (24.6%) | 1.515 ± 1.802  | 0.40      |

We regroup some categories of answers for the analysis when the numbers
