# Supplementary material for: Patient and physician expectations regarding disease and treatment of advanced HCC: The prospective PERCEPTION1 study
Source: PubMed Central journal article supplement (PMC11686048; doi:10.1016/j.jhepr.2024.101192), 2024-08-22
Supplement: mmc3.pdf [file mmc3.pdf]

## ICMJE DISCLOSURE FORM

**Date:** 8/7/2021

**Your Name:** Jean Charles Nault

**Manuscript Title:** Patient and physician expectation's regarding disease and treatment of advanced HCC: the prospective PERCEPTION1 study

**Manuscript Number (if known):** JHEPR-D-24-00819

In the interest of transparency, we ask you to disclose all relationships/activities/interests listed below that are related to the content of your manuscript. "Related" means any relation with for-profit or not-for-profit third parties whose interests may be affected by the content of the manuscript. Disclosure represents a commitment to transparency and does not necessarily indicate a bias. If you are in doubt about whether to list a relationship/activity/interest, it is preferable that you do so.

The author's relationships/activities/interests should be defined broadly. For example, if your manuscript pertains to the epidemiology of hypertension, you should declare all relationships with manufacturers of antihypertensive medication, even if that medication is not mentioned in the manuscript.

In item #1 below, report all support for the work reported in this manuscript without time limit. For all other items, the time frame for disclosure is the past 36 months.

|                                                           |                                                                                                                                                                                | Name all entities with whom you have this relationship or indicate none (add rows as needed) | Specifications/Comments (e.g., if payments were made to you or to your institution)                                                                                                                                                                                                                                                                                                     |        |                                    |  |  |                                           |  |
|-----------------------------------------------------------|--------------------------------------------------------------------------------------------------------------------------------------------------------------------------------|----------------------------------------------------------------------------------------------|-----------------------------------------------------------------------------------------------------------------------------------------------------------------------------------------------------------------------------------------------------------------------------------------------------------------------------------------------------------------------------------------|--------|------------------------------------|--|--|-------------------------------------------|--|
| <b>Time frame: Since the initial planning of the work</b> |                                                                                                                                                                                |                                                                                              |                                                                                                                                                                                                                                                                                                                                                                                         |        |                                    |  |  |                                           |  |
| <b>1</b>                                                  | All support for the present manuscript (e.g., funding, provision of study materials, medical writing, article processing charges, etc.)<br><b>No time limit for this item.</b> | <input type="checkbox"/> <b>None</b>                                                         | <table border="1" style="width: 100%; border-collapse: collapse;"> <tr> <td style="width: 60%; padding: 2px;">ipssen</td> <td style="padding: 2px;">Funding, payment to my institution</td> </tr> <tr> <td style="height: 20px;"></td> <td></td> </tr> <tr> <td colspan="2" style="text-align: center; font-size: small;">Click the tab key to add additional rows.</td> </tr> </table> | ipssen | Funding, payment to my institution |  |  | Click the tab key to add additional rows. |  |
| ipssen                                                    | Funding, payment to my institution                                                                                                                                             |                                                                                              |                                                                                                                                                                                                                                                                                                                                                                                         |        |                                    |  |  |                                           |  |
|                                                           |                                                                                                                                                                                |                                                                                              |                                                                                                                                                                                                                                                                                                                                                                                         |        |                                    |  |  |                                           |  |
| Click the tab key to add additional rows.                 |                                                                                                                                                                                |                                                                                              |                                                                                                                                                                                                                                                                                                                                                                                         |        |                                    |  |  |                                           |  |
| <b>Time frame: past 36 months</b>                         |                                                                                                                                                                                |                                                                                              |                                                                                                                                                                                                                                                                                                                                                                                         |        |                                    |  |  |                                           |  |
| <b>2</b>                                                  | Grants or contracts from any entity (if not indicated in item #1 above).                                                                                                       | <input checked="" type="checkbox"/> <b>None</b>                                              | <table border="1" style="width: 100%; border-collapse: collapse;"> <tr> <td style="width: 60%; padding: 2px;">Bayer</td> <td style="padding: 2px;">Funding, payment to my institution</td> </tr> <tr> <td style="height: 20px;"></td> <td></td> </tr> </table>                                                                                                                          | Bayer  | Funding, payment to my institution |  |  |                                           |  |
| Bayer                                                     | Funding, payment to my institution                                                                                                                                             |                                                                                              |                                                                                                                                                                                                                                                                                                                                                                                         |        |                                    |  |  |                                           |  |
|                                                           |                                                                                                                                                                                |                                                                                              |                                                                                                                                                                                                                                                                                                                                                                                         |        |                                    |  |  |                                           |  |
| <b>3</b>                                                  | Royalties or licenses                                                                                                                                                          | <input checked="" type="checkbox"/> <b>None</b>                                              | <table border="1" style="width: 100%; border-collapse: collapse;"> <tr> <td style="width: 60%; height: 20px;"></td> <td></td> </tr> <tr> <td style="height: 20px;"></td> <td></td> </tr> </table>                                                                                                                                                                                       |        |                                    |  |  |                                           |  |
|                                                           |                                                                                                                                                                                |                                                                                              |                                                                                                                                                                                                                                                                                                                                                                                         |        |                                    |  |  |                                           |  |
|                                                           |                                                                                                                                                                                |                                                                                              |                                                                                                                                                                                                                                                                                                                                                                                         |        |                                    |  |  |                                           |  |

|    |                                                                                                              | Name all entities with whom you have this relationship or indicate none (add rows as needed) | Specifications/Comments (e.g., if payments were made to you or to your institution) |
|----|--------------------------------------------------------------------------------------------------------------|----------------------------------------------------------------------------------------------|-------------------------------------------------------------------------------------|
| 4  | Consulting fees                                                                                              | <input checked="" type="checkbox"/> None                                                     |                                                                                     |
|    |                                                                                                              |                                                                                              |                                                                                     |
|    |                                                                                                              |                                                                                              |                                                                                     |
|    |                                                                                                              |                                                                                              |                                                                                     |
| 5  | Payment or honoraria for lectures, presentations, speakers bureaus, manuscript writing or educational events | <input checked="" type="checkbox"/> None                                                     |                                                                                     |
|    |                                                                                                              |                                                                                              |                                                                                     |
|    |                                                                                                              |                                                                                              |                                                                                     |
|    |                                                                                                              |                                                                                              |                                                                                     |
| 6  | Payment for expert testimony                                                                                 | <input checked="" type="checkbox"/> None                                                     |                                                                                     |
|    |                                                                                                              |                                                                                              |                                                                                     |
|    |                                                                                                              |                                                                                              |                                                                                     |
|    |                                                                                                              |                                                                                              |                                                                                     |
| 7  | Support for attending meetings and/or travel                                                                 | <input checked="" type="checkbox"/> None                                                     |                                                                                     |
|    |                                                                                                              |                                                                                              |                                                                                     |
|    |                                                                                                              |                                                                                              |                                                                                     |
|    |                                                                                                              |                                                                                              |                                                                                     |
| 8  | Patents planned, issued or pending                                                                           | <input type="checkbox"/> None                                                                |                                                                                     |
|    |                                                                                                              | Patent on AAV2 vector for gene therapy                                                       | No payment received                                                                 |
|    |                                                                                                              | Patent on circulating tumor DNA in HCC                                                       | No payment received                                                                 |
|    |                                                                                                              |                                                                                              |                                                                                     |
| 9  | Participation on a Data Safety Monitoring Board or Advisory Board                                            | <input checked="" type="checkbox"/> None                                                     |                                                                                     |
|    |                                                                                                              |                                                                                              |                                                                                     |
|    |                                                                                                              |                                                                                              |                                                                                     |
|    |                                                                                                              |                                                                                              |                                                                                     |
| 10 | Leadership or fiduciary role in other board, society, committee or advocacy group, paid or unpaid            | <input checked="" type="checkbox"/> None                                                     |                                                                                     |
|    |                                                                                                              |                                                                                              |                                                                                     |
|    |                                                                                                              |                                                                                              |                                                                                     |
|    |                                                                                                              |                                                                                              |                                                                                     |

|           |                                                                                  | Name all entities with whom you have this relationship or indicate none (add rows as needed)                                                                                                                                                                                                                         | Specifications/Comments (e.g., if payments were made to you or to your institution) |  |  |  |  |  |  |
|-----------|----------------------------------------------------------------------------------|----------------------------------------------------------------------------------------------------------------------------------------------------------------------------------------------------------------------------------------------------------------------------------------------------------------------|-------------------------------------------------------------------------------------|--|--|--|--|--|--|
| <b>11</b> | Stock or stock options                                                           | <input checked="" type="checkbox"/> <b>None</b><br><table border="1" style="width: 100%; border-collapse: collapse;"> <tr><td style="width: 50%; height: 15px;"></td><td style="width: 50%;"></td></tr> <tr><td style="height: 15px;"></td><td></td></tr> <tr><td style="height: 15px;"></td><td></td></tr> </table> |                                                                                     |  |  |  |  |  |  |
|           |                                                                                  |                                                                                                                                                                                                                                                                                                                      |                                                                                     |  |  |  |  |  |  |
|           |                                                                                  |                                                                                                                                                                                                                                                                                                                      |                                                                                     |  |  |  |  |  |  |
|           |                                                                                  |                                                                                                                                                                                                                                                                                                                      |                                                                                     |  |  |  |  |  |  |
| <b>12</b> | Receipt of equipment, materials, drugs, medical writing, gifts or other services | <input checked="" type="checkbox"/> <b>None</b><br><table border="1" style="width: 100%; border-collapse: collapse;"> <tr><td style="width: 50%; height: 15px;"></td><td style="width: 50%;"></td></tr> <tr><td style="height: 15px;"></td><td></td></tr> <tr><td style="height: 15px;"></td><td></td></tr> </table> |                                                                                     |  |  |  |  |  |  |
|           |                                                                                  |                                                                                                                                                                                                                                                                                                                      |                                                                                     |  |  |  |  |  |  |
|           |                                                                                  |                                                                                                                                                                                                                                                                                                                      |                                                                                     |  |  |  |  |  |  |
|           |                                                                                  |                                                                                                                                                                                                                                                                                                                      |                                                                                     |  |  |  |  |  |  |
| <b>13</b> | Other financial or non-financial interests                                       | <input checked="" type="checkbox"/> <b>None</b><br><table border="1" style="width: 100%; border-collapse: collapse;"> <tr><td style="width: 50%; height: 15px;"></td><td style="width: 50%;"></td></tr> <tr><td style="height: 15px;"></td><td></td></tr> <tr><td style="height: 15px;"></td><td></td></tr> </table> |                                                                                     |  |  |  |  |  |  |
|           |                                                                                  |                                                                                                                                                                                                                                                                                                                      |                                                                                     |  |  |  |  |  |  |
|           |                                                                                  |                                                                                                                                                                                                                                                                                                                      |                                                                                     |  |  |  |  |  |  |
|           |                                                                                  |                                                                                                                                                                                                                                                                                                                      |                                                                                     |  |  |  |  |  |  |

**Please place an "X" next to the following statement to indicate your agreement:**

I certify that I have answered every question and have not altered the wording of any of the questions on this form.

## ICMJE DISCLOSURE FORM

**Date:** 8/12/2024

**Your Name:** Nanthara SRITHARAN

**Manuscript Title:** Patient and physician expectation's regarding disease and treatment of advanced HCC: the prospective PERCEPTION1 study

**Manuscript Number (if known):** JHEPR-D-24-00819

In the interest of transparency, we ask you to disclose all relationships/activities/interests listed below that are related to the content of your manuscript. "Related" means any relation with for-profit or not-for-profit third parties whose interests may be affected by the content of the manuscript. Disclosure represents a commitment to transparency and does not necessarily indicate a bias. If you are in doubt about whether to list a relationship/activity/interest, it is preferable that you do so.

The author's relationships/activities/interests should be defined broadly. For example, if your manuscript pertains to the epidemiology of hypertension, you should declare all relationships with manufacturers of antihypertensive medication, even if that medication is not mentioned in the manuscript.

In item #1 below, report all support for the work reported in this manuscript without time limit. For all other items, the time frame for disclosure is the past 36 months.

|                                                           |                                                                                                                                                                                | Name all entities with whom you have this relationship or indicate none (add rows as needed)                                                                                                                                               | Specifications/Comments (e.g., if payments were made to you or to your institution) |  |  |  |  |  |                                                                                                                                                                                                                                                                                                  |  |  |  |  |  |  |
|-----------------------------------------------------------|--------------------------------------------------------------------------------------------------------------------------------------------------------------------------------|--------------------------------------------------------------------------------------------------------------------------------------------------------------------------------------------------------------------------------------------|-------------------------------------------------------------------------------------|--|--|--|--|--|--------------------------------------------------------------------------------------------------------------------------------------------------------------------------------------------------------------------------------------------------------------------------------------------------|--|--|--|--|--|--|
| <b>Time frame: Since the initial planning of the work</b> |                                                                                                                                                                                |                                                                                                                                                                                                                                            |                                                                                     |  |  |  |  |  |                                                                                                                                                                                                                                                                                                  |  |  |  |  |  |  |
| <b>1</b>                                                  | All support for the present manuscript (e.g., funding, provision of study materials, medical writing, article processing charges, etc.)<br><b>No time limit for this item.</b> | <input checked="" type="checkbox"/> <b>None</b><br><table border="1" style="width: 100%; height: 40px; margin-top: 5px;"> <tr><td style="width: 60%;"></td><td></td></tr> <tr><td></td><td></td></tr> <tr><td></td><td></td></tr> </table> |                                                                                     |  |  |  |  |  | <table border="1" style="width: 100%; height: 40px; margin-top: 5px;"> <tr><td style="width: 60%;"></td><td></td></tr> <tr><td></td><td></td></tr> <tr><td></td><td></td></tr> </table> <p style="font-size: small; color: gray; margin-top: 5px;">Click the tab key to add additional rows.</p> |  |  |  |  |  |  |
|                                                           |                                                                                                                                                                                |                                                                                                                                                                                                                                            |                                                                                     |  |  |  |  |  |                                                                                                                                                                                                                                                                                                  |  |  |  |  |  |  |
|                                                           |                                                                                                                                                                                |                                                                                                                                                                                                                                            |                                                                                     |  |  |  |  |  |                                                                                                                                                                                                                                                                                                  |  |  |  |  |  |  |
|                                                           |                                                                                                                                                                                |                                                                                                                                                                                                                                            |                                                                                     |  |  |  |  |  |                                                                                                                                                                                                                                                                                                  |  |  |  |  |  |  |
|                                                           |                                                                                                                                                                                |                                                                                                                                                                                                                                            |                                                                                     |  |  |  |  |  |                                                                                                                                                                                                                                                                                                  |  |  |  |  |  |  |
|                                                           |                                                                                                                                                                                |                                                                                                                                                                                                                                            |                                                                                     |  |  |  |  |  |                                                                                                                                                                                                                                                                                                  |  |  |  |  |  |  |
|                                                           |                                                                                                                                                                                |                                                                                                                                                                                                                                            |                                                                                     |  |  |  |  |  |                                                                                                                                                                                                                                                                                                  |  |  |  |  |  |  |
| <b>Time frame: past 36 months</b>                         |                                                                                                                                                                                |                                                                                                                                                                                                                                            |                                                                                     |  |  |  |  |  |                                                                                                                                                                                                                                                                                                  |  |  |  |  |  |  |
| <b>2</b>                                                  | Grants or contracts from any entity (if not indicated in item #1 above).                                                                                                       | <input checked="" type="checkbox"/> <b>None</b><br><table border="1" style="width: 100%; height: 40px; margin-top: 5px;"> <tr><td style="width: 60%;"></td><td></td></tr> <tr><td></td><td></td></tr> <tr><td></td><td></td></tr> </table> |                                                                                     |  |  |  |  |  | <table border="1" style="width: 100%; height: 40px; margin-top: 5px;"> <tr><td style="width: 60%;"></td><td></td></tr> <tr><td></td><td></td></tr> <tr><td></td><td></td></tr> </table>                                                                                                          |  |  |  |  |  |  |
|                                                           |                                                                                                                                                                                |                                                                                                                                                                                                                                            |                                                                                     |  |  |  |  |  |                                                                                                                                                                                                                                                                                                  |  |  |  |  |  |  |
|                                                           |                                                                                                                                                                                |                                                                                                                                                                                                                                            |                                                                                     |  |  |  |  |  |                                                                                                                                                                                                                                                                                                  |  |  |  |  |  |  |
|                                                           |                                                                                                                                                                                |                                                                                                                                                                                                                                            |                                                                                     |  |  |  |  |  |                                                                                                                                                                                                                                                                                                  |  |  |  |  |  |  |
|                                                           |                                                                                                                                                                                |                                                                                                                                                                                                                                            |                                                                                     |  |  |  |  |  |                                                                                                                                                                                                                                                                                                  |  |  |  |  |  |  |
|                                                           |                                                                                                                                                                                |                                                                                                                                                                                                                                            |                                                                                     |  |  |  |  |  |                                                                                                                                                                                                                                                                                                  |  |  |  |  |  |  |
|                                                           |                                                                                                                                                                                |                                                                                                                                                                                                                                            |                                                                                     |  |  |  |  |  |                                                                                                                                                                                                                                                                                                  |  |  |  |  |  |  |
| <b>3</b>                                                  | Royalties or licenses                                                                                                                                                          | <input checked="" type="checkbox"/> <b>None</b><br><table border="1" style="width: 100%; height: 40px; margin-top: 5px;"> <tr><td style="width: 60%;"></td><td></td></tr> <tr><td></td><td></td></tr> <tr><td></td><td></td></tr> </table> |                                                                                     |  |  |  |  |  | <table border="1" style="width: 100%; height: 40px; margin-top: 5px;"> <tr><td style="width: 60%;"></td><td></td></tr> <tr><td></td><td></td></tr> <tr><td></td><td></td></tr> </table>                                                                                                          |  |  |  |  |  |  |
|                                                           |                                                                                                                                                                                |                                                                                                                                                                                                                                            |                                                                                     |  |  |  |  |  |                                                                                                                                                                                                                                                                                                  |  |  |  |  |  |  |
|                                                           |                                                                                                                                                                                |                                                                                                                                                                                                                                            |                                                                                     |  |  |  |  |  |                                                                                                                                                                                                                                                                                                  |  |  |  |  |  |  |
|                                                           |                                                                                                                                                                                |                                                                                                                                                                                                                                            |                                                                                     |  |  |  |  |  |                                                                                                                                                                                                                                                                                                  |  |  |  |  |  |  |
|                                                           |                                                                                                                                                                                |                                                                                                                                                                                                                                            |                                                                                     |  |  |  |  |  |                                                                                                                                                                                                                                                                                                  |  |  |  |  |  |  |
|                                                           |                                                                                                                                                                                |                                                                                                                                                                                                                                            |                                                                                     |  |  |  |  |  |                                                                                                                                                                                                                                                                                                  |  |  |  |  |  |  |
|                                                           |                                                                                                                                                                                |                                                                                                                                                                                                                                            |                                                                                     |  |  |  |  |  |                                                                                                                                                                                                                                                                                                  |  |  |  |  |  |  |

|    |                                                                                                              | Name all entities with whom you have this relationship or indicate none (add rows as needed)                                                                                                                                                                                                                                                                           | Specifications/Comments (e.g., if payments were made to you or to your institution) |  |  |  |  |  |  |  |  |
|----|--------------------------------------------------------------------------------------------------------------|------------------------------------------------------------------------------------------------------------------------------------------------------------------------------------------------------------------------------------------------------------------------------------------------------------------------------------------------------------------------|-------------------------------------------------------------------------------------|--|--|--|--|--|--|--|--|
| 4  | Consulting fees                                                                                              | <input checked="" type="checkbox"/> <b>None</b><br><table border="1" style="width: 100%; border-collapse: collapse;"> <tr><td style="width: 50%; height: 15px;"></td><td style="width: 50%;"></td></tr> <tr><td style="height: 15px;"></td><td></td></tr> <tr><td style="height: 15px;"></td><td></td></tr> <tr><td style="height: 15px;"></td><td></td></tr> </table> |                                                                                     |  |  |  |  |  |  |  |  |
|    |                                                                                                              |                                                                                                                                                                                                                                                                                                                                                                        |                                                                                     |  |  |  |  |  |  |  |  |
|    |                                                                                                              |                                                                                                                                                                                                                                                                                                                                                                        |                                                                                     |  |  |  |  |  |  |  |  |
|    |                                                                                                              |                                                                                                                                                                                                                                                                                                                                                                        |                                                                                     |  |  |  |  |  |  |  |  |
|    |                                                                                                              |                                                                                                                                                                                                                                                                                                                                                                        |                                                                                     |  |  |  |  |  |  |  |  |
| 5  | Payment or honoraria for lectures, presentations, speakers bureaus, manuscript writing or educational events | <input checked="" type="checkbox"/> <b>None</b><br><table border="1" style="width: 100%; border-collapse: collapse;"> <tr><td style="width: 50%; height: 15px;"></td><td style="width: 50%;"></td></tr> <tr><td style="height: 15px;"></td><td></td></tr> <tr><td style="height: 15px;"></td><td></td></tr> </table>                                                   |                                                                                     |  |  |  |  |  |  |  |  |
|    |                                                                                                              |                                                                                                                                                                                                                                                                                                                                                                        |                                                                                     |  |  |  |  |  |  |  |  |
|    |                                                                                                              |                                                                                                                                                                                                                                                                                                                                                                        |                                                                                     |  |  |  |  |  |  |  |  |
|    |                                                                                                              |                                                                                                                                                                                                                                                                                                                                                                        |                                                                                     |  |  |  |  |  |  |  |  |
| 6  | Payment for expert testimony                                                                                 | <input checked="" type="checkbox"/> <b>None</b><br><table border="1" style="width: 100%; border-collapse: collapse;"> <tr><td style="width: 50%; height: 15px;"></td><td style="width: 50%;"></td></tr> <tr><td style="height: 15px;"></td><td></td></tr> <tr><td style="height: 15px;"></td><td></td></tr> </table>                                                   |                                                                                     |  |  |  |  |  |  |  |  |
|    |                                                                                                              |                                                                                                                                                                                                                                                                                                                                                                        |                                                                                     |  |  |  |  |  |  |  |  |
|    |                                                                                                              |                                                                                                                                                                                                                                                                                                                                                                        |                                                                                     |  |  |  |  |  |  |  |  |
|    |                                                                                                              |                                                                                                                                                                                                                                                                                                                                                                        |                                                                                     |  |  |  |  |  |  |  |  |
| 7  | Support for attending meetings and/or travel                                                                 | <input checked="" type="checkbox"/> <b>None</b><br><table border="1" style="width: 100%; border-collapse: collapse;"> <tr><td style="width: 50%; height: 15px;"></td><td style="width: 50%;"></td></tr> <tr><td style="height: 15px;"></td><td></td></tr> <tr><td style="height: 15px;"></td><td></td></tr> </table>                                                   |                                                                                     |  |  |  |  |  |  |  |  |
|    |                                                                                                              |                                                                                                                                                                                                                                                                                                                                                                        |                                                                                     |  |  |  |  |  |  |  |  |
|    |                                                                                                              |                                                                                                                                                                                                                                                                                                                                                                        |                                                                                     |  |  |  |  |  |  |  |  |
|    |                                                                                                              |                                                                                                                                                                                                                                                                                                                                                                        |                                                                                     |  |  |  |  |  |  |  |  |
| 8  | Patents planned, issued or pending                                                                           | <input checked="" type="checkbox"/> <b>None</b><br><table border="1" style="width: 100%; border-collapse: collapse;"> <tr><td style="width: 50%; height: 15px;"></td><td style="width: 50%;"></td></tr> <tr><td style="height: 15px;"></td><td></td></tr> <tr><td style="height: 15px;"></td><td></td></tr> </table>                                                   |                                                                                     |  |  |  |  |  |  |  |  |
|    |                                                                                                              |                                                                                                                                                                                                                                                                                                                                                                        |                                                                                     |  |  |  |  |  |  |  |  |
|    |                                                                                                              |                                                                                                                                                                                                                                                                                                                                                                        |                                                                                     |  |  |  |  |  |  |  |  |
|    |                                                                                                              |                                                                                                                                                                                                                                                                                                                                                                        |                                                                                     |  |  |  |  |  |  |  |  |
| 9  | Participation on a Data Safety Monitoring Board or Advisory Board                                            | <input checked="" type="checkbox"/> <b>None</b><br><table border="1" style="width: 100%; border-collapse: collapse;"> <tr><td style="width: 50%; height: 15px;"></td><td style="width: 50%;"></td></tr> <tr><td style="height: 15px;"></td><td></td></tr> <tr><td style="height: 15px;"></td><td></td></tr> </table>                                                   |                                                                                     |  |  |  |  |  |  |  |  |
|    |                                                                                                              |                                                                                                                                                                                                                                                                                                                                                                        |                                                                                     |  |  |  |  |  |  |  |  |
|    |                                                                                                              |                                                                                                                                                                                                                                                                                                                                                                        |                                                                                     |  |  |  |  |  |  |  |  |
|    |                                                                                                              |                                                                                                                                                                                                                                                                                                                                                                        |                                                                                     |  |  |  |  |  |  |  |  |
| 10 | Leadership or fiduciary role in other board, society, committee or advocacy group, paid or unpaid            | <input checked="" type="checkbox"/> <b>None</b><br><table border="1" style="width: 100%; border-collapse: collapse;"> <tr><td style="width: 50%; height: 15px;"></td><td style="width: 50%;"></td></tr> <tr><td style="height: 15px;"></td><td></td></tr> <tr><td style="height: 15px;"></td><td></td></tr> </table>                                                   |                                                                                     |  |  |  |  |  |  |  |  |
|    |                                                                                                              |                                                                                                                                                                                                                                                                                                                                                                        |                                                                                     |  |  |  |  |  |  |  |  |
|    |                                                                                                              |                                                                                                                                                                                                                                                                                                                                                                        |                                                                                     |  |  |  |  |  |  |  |  |
|    |                                                                                                              |                                                                                                                                                                                                                                                                                                                                                                        |                                                                                     |  |  |  |  |  |  |  |  |

|           |                                                                                  | Name all entities with whom you have this relationship or indicate none (add rows as needed)                                                                                                                                                                                                                         | Specifications/Comments (e.g., if payments were made to you or to your institution) |  |  |  |  |  |  |
|-----------|----------------------------------------------------------------------------------|----------------------------------------------------------------------------------------------------------------------------------------------------------------------------------------------------------------------------------------------------------------------------------------------------------------------|-------------------------------------------------------------------------------------|--|--|--|--|--|--|
| <b>11</b> | Stock or stock options                                                           | <input checked="" type="checkbox"/> <b>None</b><br><table border="1" style="width: 100%; border-collapse: collapse;"> <tr><td style="width: 50%; height: 15px;"></td><td style="width: 50%;"></td></tr> <tr><td style="height: 15px;"></td><td></td></tr> <tr><td style="height: 15px;"></td><td></td></tr> </table> |                                                                                     |  |  |  |  |  |  |
|           |                                                                                  |                                                                                                                                                                                                                                                                                                                      |                                                                                     |  |  |  |  |  |  |
|           |                                                                                  |                                                                                                                                                                                                                                                                                                                      |                                                                                     |  |  |  |  |  |  |
|           |                                                                                  |                                                                                                                                                                                                                                                                                                                      |                                                                                     |  |  |  |  |  |  |
| <b>12</b> | Receipt of equipment, materials, drugs, medical writing, gifts or other services | <input checked="" type="checkbox"/> <b>None</b><br><table border="1" style="width: 100%; border-collapse: collapse;"> <tr><td style="width: 50%; height: 15px;"></td><td style="width: 50%;"></td></tr> <tr><td style="height: 15px;"></td><td></td></tr> <tr><td style="height: 15px;"></td><td></td></tr> </table> |                                                                                     |  |  |  |  |  |  |
|           |                                                                                  |                                                                                                                                                                                                                                                                                                                      |                                                                                     |  |  |  |  |  |  |
|           |                                                                                  |                                                                                                                                                                                                                                                                                                                      |                                                                                     |  |  |  |  |  |  |
|           |                                                                                  |                                                                                                                                                                                                                                                                                                                      |                                                                                     |  |  |  |  |  |  |
| <b>13</b> | Other financial or non-financial interests                                       | <input checked="" type="checkbox"/> <b>None</b><br><table border="1" style="width: 100%; border-collapse: collapse;"> <tr><td style="width: 50%; height: 15px;"></td><td style="width: 50%;"></td></tr> <tr><td style="height: 15px;"></td><td></td></tr> <tr><td style="height: 15px;"></td><td></td></tr> </table> |                                                                                     |  |  |  |  |  |  |
|           |                                                                                  |                                                                                                                                                                                                                                                                                                                      |                                                                                     |  |  |  |  |  |  |
|           |                                                                                  |                                                                                                                                                                                                                                                                                                                      |                                                                                     |  |  |  |  |  |  |
|           |                                                                                  |                                                                                                                                                                                                                                                                                                                      |                                                                                     |  |  |  |  |  |  |

**Please place an "X" next to the following statement to indicate your agreement:**

I certify that I have answered every question and have not altered the wording of any of the questions on this form.

## ICMJE DISCLOSURE FORM

**Date:** 8/7/2024

**Your Name:** VERSET, Gontran

**Manuscript Title:** Patient and physician expectation's regarding disease and treatment of advanced HCC: the prospective PERCEPTION1 study

**Manuscript Number (if known):** JHEPR-D-24-00819

In the interest of transparency, we ask you to disclose all relationships/activities/interests listed below that are related to the content of your manuscript. "Related" means any relation with for-profit or not-for-profit third parties whose interests may be affected by the content of the manuscript. Disclosure represents a commitment to transparency and does not necessarily indicate a bias. If you are in doubt about whether to list a relationship/activity/interest, it is preferable that you do so.

The author's relationships/activities/interests should be defined broadly. For example, if your manuscript pertains to the epidemiology of hypertension, you should declare all relationships with manufacturers of antihypertensive medication, even if that medication is not mentioned in the manuscript.

In item #1 below, report all support for the work reported in this manuscript without time limit. For all other items, the time frame for disclosure is the past 36 months.

|                                                    | Name all entities with whom you have this relationship or indicate none (add rows as needed)                                                                                   | Specifications/Comments (e.g., if payments were made to you or to your institution)                                                                                                                                                                                                                                                                                                                                                                  |        |             |  |  |  |  |
|----------------------------------------------------|--------------------------------------------------------------------------------------------------------------------------------------------------------------------------------|------------------------------------------------------------------------------------------------------------------------------------------------------------------------------------------------------------------------------------------------------------------------------------------------------------------------------------------------------------------------------------------------------------------------------------------------------|--------|-------------|--|--|--|--|
| Time frame: Since the initial planning of the work |                                                                                                                                                                                |                                                                                                                                                                                                                                                                                                                                                                                                                                                      |        |             |  |  |  |  |
| <b>1</b>                                           | All support for the present manuscript (e.g., funding, provision of study materials, medical writing, article processing charges, etc.)<br><b>No time limit for this item.</b> | <input checked="" type="checkbox"/> <b>None</b><br><table border="1" style="width: 100%; border-collapse: collapse; margin-top: 5px;"> <tr><td style="width: 60%; height: 20px;"></td><td style="width: 40%;"></td></tr> <tr><td style="height: 20px;"></td><td></td></tr> <tr><td style="height: 20px;"></td><td></td></tr> </table> <p style="font-size: small; text-align: right; margin-top: 5px;">Click the tab key to add additional rows.</p> |        |             |  |  |  |  |
|                                                    |                                                                                                                                                                                |                                                                                                                                                                                                                                                                                                                                                                                                                                                      |        |             |  |  |  |  |
|                                                    |                                                                                                                                                                                |                                                                                                                                                                                                                                                                                                                                                                                                                                                      |        |             |  |  |  |  |
|                                                    |                                                                                                                                                                                |                                                                                                                                                                                                                                                                                                                                                                                                                                                      |        |             |  |  |  |  |
| Time frame: past 36 months                         |                                                                                                                                                                                |                                                                                                                                                                                                                                                                                                                                                                                                                                                      |        |             |  |  |  |  |
| <b>2</b>                                           | Grants or contracts from any entity (if not indicated in item #1 above).                                                                                                       | <input type="checkbox"/> <b>None</b><br><table border="1" style="width: 100%; border-collapse: collapse; margin-top: 5px;"> <tr> <td style="width: 60%; padding: 2px;">Terumo</td> <td style="width: 40%; padding: 2px;">Institution</td> </tr> <tr><td style="height: 20px;"></td><td></td></tr> <tr><td style="height: 20px;"></td><td></td></tr> </table>                                                                                         | Terumo | Institution |  |  |  |  |
| Terumo                                             | Institution                                                                                                                                                                    |                                                                                                                                                                                                                                                                                                                                                                                                                                                      |        |             |  |  |  |  |
|                                                    |                                                                                                                                                                                |                                                                                                                                                                                                                                                                                                                                                                                                                                                      |        |             |  |  |  |  |
|                                                    |                                                                                                                                                                                |                                                                                                                                                                                                                                                                                                                                                                                                                                                      |        |             |  |  |  |  |
| <b>3</b>                                           | Royalties or licenses                                                                                                                                                          | <input checked="" type="checkbox"/> <b>None</b><br><table border="1" style="width: 100%; border-collapse: collapse; margin-top: 5px;"> <tr><td style="width: 60%; height: 20px;"></td><td style="width: 40%;"></td></tr> <tr><td style="height: 20px;"></td><td></td></tr> <tr><td style="height: 20px;"></td><td></td></tr> </table>                                                                                                                |        |             |  |  |  |  |
|                                                    |                                                                                                                                                                                |                                                                                                                                                                                                                                                                                                                                                                                                                                                      |        |             |  |  |  |  |
|                                                    |                                                                                                                                                                                |                                                                                                                                                                                                                                                                                                                                                                                                                                                      |        |             |  |  |  |  |
|                                                    |                                                                                                                                                                                |                                                                                                                                                                                                                                                                                                                                                                                                                                                      |        |             |  |  |  |  |

|              |                                                                                                              | Name all entities with whom you have this relationship or indicate none (add rows as needed)                                                                                                                                                         | Specifications/Comments (e.g., if payments were made to you or to your institution) |             |              |             |              |             |        |             |  |
|--------------|--------------------------------------------------------------------------------------------------------------|------------------------------------------------------------------------------------------------------------------------------------------------------------------------------------------------------------------------------------------------------|-------------------------------------------------------------------------------------|-------------|--------------|-------------|--------------|-------------|--------|-------------|--|
| 4            | Consulting fees                                                                                              | <input type="checkbox"/> None<br><table border="1"> <tr><td></td><td></td></tr> <tr><td></td><td></td></tr> <tr><td></td><td></td></tr> </table>                                                                                                     |                                                                                     |             |              |             |              |             |        |             |  |
|              |                                                                                                              |                                                                                                                                                                                                                                                      |                                                                                     |             |              |             |              |             |        |             |  |
|              |                                                                                                              |                                                                                                                                                                                                                                                      |                                                                                     |             |              |             |              |             |        |             |  |
|              |                                                                                                              |                                                                                                                                                                                                                                                      |                                                                                     |             |              |             |              |             |        |             |  |
| 5            | Payment or honoraria for lectures, presentations, speakers bureaus, manuscript writing or educational events | <input type="checkbox"/> None<br><table border="1"> <tr><td>Roche</td><td>Institution</td></tr> <tr><td>Eisai</td><td>Institution</td></tr> <tr><td>Astra Zeneca</td><td>Institution</td></tr> <tr><td>Terumo</td><td>Institution</td></tr> </table> | Roche                                                                               | Institution | Eisai        | Institution | Astra Zeneca | Institution | Terumo | Institution |  |
| Roche        | Institution                                                                                                  |                                                                                                                                                                                                                                                      |                                                                                     |             |              |             |              |             |        |             |  |
| Eisai        | Institution                                                                                                  |                                                                                                                                                                                                                                                      |                                                                                     |             |              |             |              |             |        |             |  |
| Astra Zeneca | Institution                                                                                                  |                                                                                                                                                                                                                                                      |                                                                                     |             |              |             |              |             |        |             |  |
| Terumo       | Institution                                                                                                  |                                                                                                                                                                                                                                                      |                                                                                     |             |              |             |              |             |        |             |  |
| 6            | Payment for expert testimony                                                                                 | <input checked="" type="checkbox"/> None<br><table border="1"> <tr><td></td><td></td></tr> <tr><td></td><td></td></tr> <tr><td></td><td></td></tr> </table>                                                                                          |                                                                                     |             |              |             |              |             |        |             |  |
|              |                                                                                                              |                                                                                                                                                                                                                                                      |                                                                                     |             |              |             |              |             |        |             |  |
|              |                                                                                                              |                                                                                                                                                                                                                                                      |                                                                                     |             |              |             |              |             |        |             |  |
|              |                                                                                                              |                                                                                                                                                                                                                                                      |                                                                                     |             |              |             |              |             |        |             |  |
| 7            | Support for attending meetings and/or travel                                                                 | <input type="checkbox"/> None<br><table border="1"> <tr><td>Roche</td><td>Institution</td></tr> <tr><td>Astra Zeneca</td><td>Institution</td></tr> <tr><td>Terumo</td><td>Institution</td></tr> <tr><td>Ipsen</td><td>Institution</td></tr> </table> | Roche                                                                               | Institution | Astra Zeneca | Institution | Terumo       | Institution | Ipsen  | Institution |  |
| Roche        | Institution                                                                                                  |                                                                                                                                                                                                                                                      |                                                                                     |             |              |             |              |             |        |             |  |
| Astra Zeneca | Institution                                                                                                  |                                                                                                                                                                                                                                                      |                                                                                     |             |              |             |              |             |        |             |  |
| Terumo       | Institution                                                                                                  |                                                                                                                                                                                                                                                      |                                                                                     |             |              |             |              |             |        |             |  |
| Ipsen        | Institution                                                                                                  |                                                                                                                                                                                                                                                      |                                                                                     |             |              |             |              |             |        |             |  |
| 8            | Patents planned, issued or pending                                                                           | <input checked="" type="checkbox"/> None<br><table border="1"> <tr><td></td><td></td></tr> <tr><td></td><td></td></tr> <tr><td></td><td></td></tr> </table>                                                                                          |                                                                                     |             |              |             |              |             |        |             |  |
|              |                                                                                                              |                                                                                                                                                                                                                                                      |                                                                                     |             |              |             |              |             |        |             |  |
|              |                                                                                                              |                                                                                                                                                                                                                                                      |                                                                                     |             |              |             |              |             |        |             |  |
|              |                                                                                                              |                                                                                                                                                                                                                                                      |                                                                                     |             |              |             |              |             |        |             |  |
| 9            | Participation on a Data Safety Monitoring Board or Advisory Board                                            | <input type="checkbox"/> None<br><table border="1"> <tr><td>Roche</td><td>Institution</td></tr> <tr><td>Astra Zeneca</td><td>Institution</td></tr> <tr><td>Teromo</td><td>Institution</td></tr> </table>                                             | Roche                                                                               | Institution | Astra Zeneca | Institution | Teromo       | Institution |        |             |  |
| Roche        | Institution                                                                                                  |                                                                                                                                                                                                                                                      |                                                                                     |             |              |             |              |             |        |             |  |
| Astra Zeneca | Institution                                                                                                  |                                                                                                                                                                                                                                                      |                                                                                     |             |              |             |              |             |        |             |  |
| Teromo       | Institution                                                                                                  |                                                                                                                                                                                                                                                      |                                                                                     |             |              |             |              |             |        |             |  |
| 10           | Leadership or fiduciary role in other board, society, committee or advocacy group, paid or unpaid            | <input checked="" type="checkbox"/> None<br><table border="1"> <tr><td></td><td></td></tr> <tr><td></td><td></td></tr> <tr><td></td><td></td></tr> </table>                                                                                          |                                                                                     |             |              |             |              |             |        |             |  |
|              |                                                                                                              |                                                                                                                                                                                                                                                      |                                                                                     |             |              |             |              |             |        |             |  |
|              |                                                                                                              |                                                                                                                                                                                                                                                      |                                                                                     |             |              |             |              |             |        |             |  |
|              |                                                                                                              |                                                                                                                                                                                                                                                      |                                                                                     |             |              |             |              |             |        |             |  |



|           |                                                                                  | Name all entities with whom you have this relationship or indicate none (add rows as needed)                                                                                                                                                                                                                         | Specifications/Comments (e.g., if payments were made to you or to your institution) |  |  |  |  |  |  |
|-----------|----------------------------------------------------------------------------------|----------------------------------------------------------------------------------------------------------------------------------------------------------------------------------------------------------------------------------------------------------------------------------------------------------------------|-------------------------------------------------------------------------------------|--|--|--|--|--|--|
| <b>11</b> | Stock or stock options                                                           | <input checked="" type="checkbox"/> <b>None</b><br><table border="1" style="width: 100%; border-collapse: collapse;"> <tr><td style="width: 50%; height: 20px;"></td><td style="width: 50%;"></td></tr> <tr><td style="height: 20px;"></td><td></td></tr> <tr><td style="height: 20px;"></td><td></td></tr> </table> |                                                                                     |  |  |  |  |  |  |
|           |                                                                                  |                                                                                                                                                                                                                                                                                                                      |                                                                                     |  |  |  |  |  |  |
|           |                                                                                  |                                                                                                                                                                                                                                                                                                                      |                                                                                     |  |  |  |  |  |  |
|           |                                                                                  |                                                                                                                                                                                                                                                                                                                      |                                                                                     |  |  |  |  |  |  |
| <b>12</b> | Receipt of equipment, materials, drugs, medical writing, gifts or other services | <input checked="" type="checkbox"/> <b>None</b><br><table border="1" style="width: 100%; border-collapse: collapse;"> <tr><td style="width: 50%; height: 20px;"></td><td style="width: 50%;"></td></tr> <tr><td style="height: 20px;"></td><td></td></tr> <tr><td style="height: 20px;"></td><td></td></tr> </table> |                                                                                     |  |  |  |  |  |  |
|           |                                                                                  |                                                                                                                                                                                                                                                                                                                      |                                                                                     |  |  |  |  |  |  |
|           |                                                                                  |                                                                                                                                                                                                                                                                                                                      |                                                                                     |  |  |  |  |  |  |
|           |                                                                                  |                                                                                                                                                                                                                                                                                                                      |                                                                                     |  |  |  |  |  |  |
| <b>13</b> | Other financial or non-financial interests                                       | <input checked="" type="checkbox"/> <b>None</b><br><table border="1" style="width: 100%; border-collapse: collapse;"> <tr><td style="width: 50%; height: 20px;"></td><td style="width: 50%;"></td></tr> <tr><td style="height: 20px;"></td><td></td></tr> <tr><td style="height: 20px;"></td><td></td></tr> </table> |                                                                                     |  |  |  |  |  |  |
|           |                                                                                  |                                                                                                                                                                                                                                                                                                                      |                                                                                     |  |  |  |  |  |  |
|           |                                                                                  |                                                                                                                                                                                                                                                                                                                      |                                                                                     |  |  |  |  |  |  |
|           |                                                                                  |                                                                                                                                                                                                                                                                                                                      |                                                                                     |  |  |  |  |  |  |

**Please place an "X" next to the following statement to indicate your agreement:**

I certify that I have answered every question and have not altered the wording of any of the questions on this form.

## ICMJE DISCLOSURE FORM

**Date:** 8/7/2021

**Your Name:** Ivan Borbath

**Manuscript Title:** Patient and physician expectation's regarding disease and treatment of advanced HCC: the prospective PERCEPTION1 study

**Manuscript Number (if known):** JHEPR-D-24-00819

In the interest of transparency, we ask you to disclose all relationships/activities/interests listed below that are related to the content of your manuscript. "Related" means any relation with for-profit or not-for-profit third parties whose interests may be affected by the content of the manuscript. Disclosure represents a commitment to transparency and does not necessarily indicate a bias. If you are in doubt about whether to list a relationship/activity/interest, it is preferable that you do so.

The author's relationships/activities/interests should be defined broadly. For example, if your manuscript pertains to the epidemiology of hypertension, you should declare all relationships with manufacturers of antihypertensive medication, even if that medication is not mentioned in the manuscript.

In item #1 below, report all support for the work reported in this manuscript without time limit. For all other items, the time frame for disclosure is the past 36 months.

|                                                    | Name all entities with whom you have this relationship or indicate none (add rows as needed)                                                                                   | Specifications/Comments (e.g., if payments were made to you or to your institution)                                                                                                                                                                                                                                                                       |  |  |  |  |  |  |
|----------------------------------------------------|--------------------------------------------------------------------------------------------------------------------------------------------------------------------------------|-----------------------------------------------------------------------------------------------------------------------------------------------------------------------------------------------------------------------------------------------------------------------------------------------------------------------------------------------------------|--|--|--|--|--|--|
| Time frame: Since the initial planning of the work |                                                                                                                                                                                |                                                                                                                                                                                                                                                                                                                                                           |  |  |  |  |  |  |
| <b>1</b>                                           | All support for the present manuscript (e.g., funding, provision of study materials, medical writing, article processing charges, etc.)<br><b>No time limit for this item.</b> | <input checked="" type="checkbox"/> <b>None</b><br><table border="1" style="width: 100%; height: 40px; margin-top: 5px;"> <tr><td style="width: 60%;"></td><td></td></tr> <tr><td></td><td></td></tr> <tr><td></td><td></td></tr> </table> <p style="font-size: small; text-align: right; margin-top: 5px;">Click the tab key to add additional rows.</p> |  |  |  |  |  |  |
|                                                    |                                                                                                                                                                                |                                                                                                                                                                                                                                                                                                                                                           |  |  |  |  |  |  |
|                                                    |                                                                                                                                                                                |                                                                                                                                                                                                                                                                                                                                                           |  |  |  |  |  |  |
|                                                    |                                                                                                                                                                                |                                                                                                                                                                                                                                                                                                                                                           |  |  |  |  |  |  |
| Time frame: past 36 months                         |                                                                                                                                                                                |                                                                                                                                                                                                                                                                                                                                                           |  |  |  |  |  |  |
| <b>2</b>                                           | Grants or contracts from any entity (if not indicated in item #1 above).                                                                                                       | <input checked="" type="checkbox"/> <b>None</b><br><table border="1" style="width: 100%; height: 40px; margin-top: 5px;"> <tr><td style="width: 60%;"></td><td></td></tr> <tr><td></td><td></td></tr> <tr><td></td><td></td></tr> </table>                                                                                                                |  |  |  |  |  |  |
|                                                    |                                                                                                                                                                                |                                                                                                                                                                                                                                                                                                                                                           |  |  |  |  |  |  |
|                                                    |                                                                                                                                                                                |                                                                                                                                                                                                                                                                                                                                                           |  |  |  |  |  |  |
|                                                    |                                                                                                                                                                                |                                                                                                                                                                                                                                                                                                                                                           |  |  |  |  |  |  |
| <b>3</b>                                           | Royalties or licenses                                                                                                                                                          | <input checked="" type="checkbox"/> <b>None</b><br><table border="1" style="width: 100%; height: 40px; margin-top: 5px;"> <tr><td style="width: 60%;"></td><td></td></tr> <tr><td></td><td></td></tr> <tr><td></td><td></td></tr> </table>                                                                                                                |  |  |  |  |  |  |
|                                                    |                                                                                                                                                                                |                                                                                                                                                                                                                                                                                                                                                           |  |  |  |  |  |  |
|                                                    |                                                                                                                                                                                |                                                                                                                                                                                                                                                                                                                                                           |  |  |  |  |  |  |
|                                                    |                                                                                                                                                                                |                                                                                                                                                                                                                                                                                                                                                           |  |  |  |  |  |  |

|                                     |                                                                                                              | Name all entities with whom you have this relationship or indicate none (add rows as needed)                                                                                                                                                                                                                                                                           | Specifications/Comments (e.g., if payments were made to you or to your institution) |  |  |  |  |  |  |  |  |
|-------------------------------------|--------------------------------------------------------------------------------------------------------------|------------------------------------------------------------------------------------------------------------------------------------------------------------------------------------------------------------------------------------------------------------------------------------------------------------------------------------------------------------------------|-------------------------------------------------------------------------------------|--|--|--|--|--|--|--|--|
| 4                                   | Consulting fees                                                                                              | <input checked="" type="checkbox"/> <b>None</b><br><table border="1" style="width: 100%; border-collapse: collapse;"> <tr><td style="width: 50%; height: 15px;"></td><td style="width: 50%;"></td></tr> <tr><td style="height: 15px;"></td><td></td></tr> <tr><td style="height: 15px;"></td><td></td></tr> <tr><td style="height: 15px;"></td><td></td></tr> </table> |                                                                                     |  |  |  |  |  |  |  |  |
|                                     |                                                                                                              |                                                                                                                                                                                                                                                                                                                                                                        |                                                                                     |  |  |  |  |  |  |  |  |
|                                     |                                                                                                              |                                                                                                                                                                                                                                                                                                                                                                        |                                                                                     |  |  |  |  |  |  |  |  |
|                                     |                                                                                                              |                                                                                                                                                                                                                                                                                                                                                                        |                                                                                     |  |  |  |  |  |  |  |  |
|                                     |                                                                                                              |                                                                                                                                                                                                                                                                                                                                                                        |                                                                                     |  |  |  |  |  |  |  |  |
| 5                                   | Payment or honoraria for lectures, presentations, speakers bureaus, manuscript writing or educational events | <input type="checkbox"/> <b>None</b><br><table border="1" style="width: 100%; border-collapse: collapse;"> <tr><td style="width: 50%; height: 15px;">Eisai, Servier, Roche, Astra-Zeneca</td><td style="width: 50%;"></td></tr> <tr><td style="height: 15px;"></td><td></td></tr> <tr><td style="height: 15px;"></td><td></td></tr> </table>                           | Eisai, Servier, Roche, Astra-Zeneca                                                 |  |  |  |  |  |  |  |  |
| Eisai, Servier, Roche, Astra-Zeneca |                                                                                                              |                                                                                                                                                                                                                                                                                                                                                                        |                                                                                     |  |  |  |  |  |  |  |  |
|                                     |                                                                                                              |                                                                                                                                                                                                                                                                                                                                                                        |                                                                                     |  |  |  |  |  |  |  |  |
|                                     |                                                                                                              |                                                                                                                                                                                                                                                                                                                                                                        |                                                                                     |  |  |  |  |  |  |  |  |
| 6                                   | Payment for expert testimony                                                                                 | <input checked="" type="checkbox"/> <b>None</b><br><table border="1" style="width: 100%; border-collapse: collapse;"> <tr><td style="width: 50%; height: 15px;"></td><td style="width: 50%;"></td></tr> <tr><td style="height: 15px;"></td><td></td></tr> <tr><td style="height: 15px;"></td><td></td></tr> </table>                                                   |                                                                                     |  |  |  |  |  |  |  |  |
|                                     |                                                                                                              |                                                                                                                                                                                                                                                                                                                                                                        |                                                                                     |  |  |  |  |  |  |  |  |
|                                     |                                                                                                              |                                                                                                                                                                                                                                                                                                                                                                        |                                                                                     |  |  |  |  |  |  |  |  |
|                                     |                                                                                                              |                                                                                                                                                                                                                                                                                                                                                                        |                                                                                     |  |  |  |  |  |  |  |  |
| 7                                   | Support for attending meetings and/or travel                                                                 | <input type="checkbox"/> <b>None</b><br><table border="1" style="width: 100%; border-collapse: collapse;"> <tr><td style="width: 50%; height: 15px;">Ipsen, Astra-Zeneca, Servier, Roche</td><td style="width: 50%;"></td></tr> <tr><td style="height: 15px;"></td><td></td></tr> <tr><td style="height: 15px;"></td><td></td></tr> </table>                           | Ipsen, Astra-Zeneca, Servier, Roche                                                 |  |  |  |  |  |  |  |  |
| Ipsen, Astra-Zeneca, Servier, Roche |                                                                                                              |                                                                                                                                                                                                                                                                                                                                                                        |                                                                                     |  |  |  |  |  |  |  |  |
|                                     |                                                                                                              |                                                                                                                                                                                                                                                                                                                                                                        |                                                                                     |  |  |  |  |  |  |  |  |
|                                     |                                                                                                              |                                                                                                                                                                                                                                                                                                                                                                        |                                                                                     |  |  |  |  |  |  |  |  |
| 8                                   | Patents planned, issued or pending                                                                           | <input checked="" type="checkbox"/> <b>None</b><br><table border="1" style="width: 100%; border-collapse: collapse;"> <tr><td style="width: 50%; height: 15px;"></td><td style="width: 50%;"></td></tr> <tr><td style="height: 15px;"></td><td></td></tr> <tr><td style="height: 15px;"></td><td></td></tr> </table>                                                   |                                                                                     |  |  |  |  |  |  |  |  |
|                                     |                                                                                                              |                                                                                                                                                                                                                                                                                                                                                                        |                                                                                     |  |  |  |  |  |  |  |  |
|                                     |                                                                                                              |                                                                                                                                                                                                                                                                                                                                                                        |                                                                                     |  |  |  |  |  |  |  |  |
|                                     |                                                                                                              |                                                                                                                                                                                                                                                                                                                                                                        |                                                                                     |  |  |  |  |  |  |  |  |
| 9                                   | Participation on a Data Safety Monitoring Board or Advisory Board                                            | <input checked="" type="checkbox"/> <b>None</b><br><table border="1" style="width: 100%; border-collapse: collapse;"> <tr><td style="width: 50%; height: 15px;"></td><td style="width: 50%;"></td></tr> <tr><td style="height: 15px;"></td><td></td></tr> <tr><td style="height: 15px;"></td><td></td></tr> </table>                                                   |                                                                                     |  |  |  |  |  |  |  |  |
|                                     |                                                                                                              |                                                                                                                                                                                                                                                                                                                                                                        |                                                                                     |  |  |  |  |  |  |  |  |
|                                     |                                                                                                              |                                                                                                                                                                                                                                                                                                                                                                        |                                                                                     |  |  |  |  |  |  |  |  |
|                                     |                                                                                                              |                                                                                                                                                                                                                                                                                                                                                                        |                                                                                     |  |  |  |  |  |  |  |  |
| 10                                  | Leadership or fiduciary role in other board, society, committee or advocacy group, paid or unpaid            | <input checked="" type="checkbox"/> <b>None</b><br><table border="1" style="width: 100%; border-collapse: collapse;"> <tr><td style="width: 50%; height: 15px;"></td><td style="width: 50%;"></td></tr> <tr><td style="height: 15px;"></td><td></td></tr> <tr><td style="height: 15px;"></td><td></td></tr> </table>                                                   |                                                                                     |  |  |  |  |  |  |  |  |
|                                     |                                                                                                              |                                                                                                                                                                                                                                                                                                                                                                        |                                                                                     |  |  |  |  |  |  |  |  |
|                                     |                                                                                                              |                                                                                                                                                                                                                                                                                                                                                                        |                                                                                     |  |  |  |  |  |  |  |  |
|                                     |                                                                                                              |                                                                                                                                                                                                                                                                                                                                                                        |                                                                                     |  |  |  |  |  |  |  |  |

|           |                                                                                  | Name all entities with whom you have this relationship or indicate none (add rows as needed) | Specifications/Comments (e.g., if payments were made to you or to your institution) |
|-----------|----------------------------------------------------------------------------------|----------------------------------------------------------------------------------------------|-------------------------------------------------------------------------------------|
| <b>11</b> | Stock or stock options                                                           | <input checked="" type="checkbox"/> <b>None</b>                                              |                                                                                     |
|           |                                                                                  |                                                                                              |                                                                                     |
|           |                                                                                  |                                                                                              |                                                                                     |
| <b>12</b> | Receipt of equipment, materials, drugs, medical writing, gifts or other services | <input checked="" type="checkbox"/> <b>None</b>                                              |                                                                                     |
|           |                                                                                  |                                                                                              |                                                                                     |
|           |                                                                                  |                                                                                              |                                                                                     |
| <b>13</b> | Other financial or non-financial interests                                       | <input checked="" type="checkbox"/> <b>None</b>                                              |                                                                                     |
|           |                                                                                  |                                                                                              |                                                                                     |
|           |                                                                                  |                                                                                              |                                                                                     |

**Please place an "X" next to the following statement to indicate your agreement:**

I certify that I have answered every question and have not altered the wording of any of the questions on this form.

## ICMJE DISCLOSURE FORM

**Date:** 8/7/2021

**Your Name:** Marie Lequoy

**Manuscript Title:** Patient and physician expectation's regarding disease and treatment of advanced HCC: the prospective PERCEPTION1 study

**Manuscript Number (if known):** JHEPR-D-24-00819

In the interest of transparency, we ask you to disclose all relationships/activities/interests listed below that are related to the content of your manuscript. "Related" means any relation with for-profit or not-for-profit third parties whose interests may be affected by the content of the manuscript. Disclosure represents a commitment to transparency and does not necessarily indicate a bias. If you are in doubt about whether to list a relationship/activity/interest, it is preferable that you do so.

The author's relationships/activities/interests should be defined broadly. For example, if your manuscript pertains to the epidemiology of hypertension, you should declare all relationships with manufacturers of antihypertensive medication, even if that medication is not mentioned in the manuscript.

In item #1 below, report all support for the work reported in this manuscript without time limit. For all other items, the time frame for disclosure is the past 36 months.

|                                                    | Name all entities with whom you have this relationship or indicate none (add rows as needed)                                                                                   | Specifications/Comments (e.g., if payments were made to you or to your institution)                                                                                                                                                                                                                                                                       |  |  |  |  |  |  |
|----------------------------------------------------|--------------------------------------------------------------------------------------------------------------------------------------------------------------------------------|-----------------------------------------------------------------------------------------------------------------------------------------------------------------------------------------------------------------------------------------------------------------------------------------------------------------------------------------------------------|--|--|--|--|--|--|
| Time frame: Since the initial planning of the work |                                                                                                                                                                                |                                                                                                                                                                                                                                                                                                                                                           |  |  |  |  |  |  |
| <b>1</b>                                           | All support for the present manuscript (e.g., funding, provision of study materials, medical writing, article processing charges, etc.)<br><b>No time limit for this item.</b> | <input checked="" type="checkbox"/> <b>None</b><br><table border="1" style="width: 100%; height: 40px; margin-top: 5px;"> <tr><td style="width: 60%;"></td><td></td></tr> <tr><td></td><td></td></tr> <tr><td></td><td></td></tr> </table> <p style="font-size: small; text-align: right; margin-top: 5px;">Click the tab key to add additional rows.</p> |  |  |  |  |  |  |
|                                                    |                                                                                                                                                                                |                                                                                                                                                                                                                                                                                                                                                           |  |  |  |  |  |  |
|                                                    |                                                                                                                                                                                |                                                                                                                                                                                                                                                                                                                                                           |  |  |  |  |  |  |
|                                                    |                                                                                                                                                                                |                                                                                                                                                                                                                                                                                                                                                           |  |  |  |  |  |  |
| Time frame: past 36 months                         |                                                                                                                                                                                |                                                                                                                                                                                                                                                                                                                                                           |  |  |  |  |  |  |
| <b>2</b>                                           | Grants or contracts from any entity (if not indicated in item #1 above).                                                                                                       | <input checked="" type="checkbox"/> <b>None</b><br><table border="1" style="width: 100%; height: 40px; margin-top: 5px;"> <tr><td style="width: 60%;"></td><td></td></tr> <tr><td></td><td></td></tr> <tr><td></td><td></td></tr> </table>                                                                                                                |  |  |  |  |  |  |
|                                                    |                                                                                                                                                                                |                                                                                                                                                                                                                                                                                                                                                           |  |  |  |  |  |  |
|                                                    |                                                                                                                                                                                |                                                                                                                                                                                                                                                                                                                                                           |  |  |  |  |  |  |
|                                                    |                                                                                                                                                                                |                                                                                                                                                                                                                                                                                                                                                           |  |  |  |  |  |  |
| <b>3</b>                                           | Royalties or licenses                                                                                                                                                          | <input checked="" type="checkbox"/> <b>None</b><br><table border="1" style="width: 100%; height: 40px; margin-top: 5px;"> <tr><td style="width: 60%;"></td><td></td></tr> <tr><td></td><td></td></tr> <tr><td></td><td></td></tr> </table>                                                                                                                |  |  |  |  |  |  |
|                                                    |                                                                                                                                                                                |                                                                                                                                                                                                                                                                                                                                                           |  |  |  |  |  |  |
|                                                    |                                                                                                                                                                                |                                                                                                                                                                                                                                                                                                                                                           |  |  |  |  |  |  |
|                                                    |                                                                                                                                                                                |                                                                                                                                                                                                                                                                                                                                                           |  |  |  |  |  |  |

|    |                                                                                                              | Name all entities with whom you have this relationship or indicate none (add rows as needed)                                                                                                                                                                                                                                                                           | Specifications/Comments (e.g., if payments were made to you or to your institution) |  |  |  |  |  |  |  |  |
|----|--------------------------------------------------------------------------------------------------------------|------------------------------------------------------------------------------------------------------------------------------------------------------------------------------------------------------------------------------------------------------------------------------------------------------------------------------------------------------------------------|-------------------------------------------------------------------------------------|--|--|--|--|--|--|--|--|
| 4  | Consulting fees                                                                                              | <input checked="" type="checkbox"/> <b>None</b><br><table border="1" style="width: 100%; border-collapse: collapse;"> <tr><td style="width: 50%; height: 15px;"></td><td style="width: 50%;"></td></tr> <tr><td style="height: 15px;"></td><td></td></tr> <tr><td style="height: 15px;"></td><td></td></tr> <tr><td style="height: 15px;"></td><td></td></tr> </table> |                                                                                     |  |  |  |  |  |  |  |  |
|    |                                                                                                              |                                                                                                                                                                                                                                                                                                                                                                        |                                                                                     |  |  |  |  |  |  |  |  |
|    |                                                                                                              |                                                                                                                                                                                                                                                                                                                                                                        |                                                                                     |  |  |  |  |  |  |  |  |
|    |                                                                                                              |                                                                                                                                                                                                                                                                                                                                                                        |                                                                                     |  |  |  |  |  |  |  |  |
|    |                                                                                                              |                                                                                                                                                                                                                                                                                                                                                                        |                                                                                     |  |  |  |  |  |  |  |  |
| 5  | Payment or honoraria for lectures, presentations, speakers bureaus, manuscript writing or educational events | <input checked="" type="checkbox"/> <b>None</b><br><table border="1" style="width: 100%; border-collapse: collapse;"> <tr><td style="width: 50%; height: 15px;"></td><td style="width: 50%;"></td></tr> <tr><td style="height: 15px;"></td><td></td></tr> <tr><td style="height: 15px;"></td><td></td></tr> </table>                                                   |                                                                                     |  |  |  |  |  |  |  |  |
|    |                                                                                                              |                                                                                                                                                                                                                                                                                                                                                                        |                                                                                     |  |  |  |  |  |  |  |  |
|    |                                                                                                              |                                                                                                                                                                                                                                                                                                                                                                        |                                                                                     |  |  |  |  |  |  |  |  |
|    |                                                                                                              |                                                                                                                                                                                                                                                                                                                                                                        |                                                                                     |  |  |  |  |  |  |  |  |
| 6  | Payment for expert testimony                                                                                 | <input checked="" type="checkbox"/> <b>None</b><br><table border="1" style="width: 100%; border-collapse: collapse;"> <tr><td style="width: 50%; height: 15px;"></td><td style="width: 50%;"></td></tr> <tr><td style="height: 15px;"></td><td></td></tr> <tr><td style="height: 15px;"></td><td></td></tr> </table>                                                   |                                                                                     |  |  |  |  |  |  |  |  |
|    |                                                                                                              |                                                                                                                                                                                                                                                                                                                                                                        |                                                                                     |  |  |  |  |  |  |  |  |
|    |                                                                                                              |                                                                                                                                                                                                                                                                                                                                                                        |                                                                                     |  |  |  |  |  |  |  |  |
|    |                                                                                                              |                                                                                                                                                                                                                                                                                                                                                                        |                                                                                     |  |  |  |  |  |  |  |  |
| 7  | Support for attending meetings and/or travel                                                                 | <input checked="" type="checkbox"/> <b>None</b><br><table border="1" style="width: 100%; border-collapse: collapse;"> <tr><td style="width: 50%; height: 15px;"></td><td style="width: 50%;"></td></tr> <tr><td style="height: 15px;"></td><td></td></tr> <tr><td style="height: 15px;"></td><td></td></tr> </table>                                                   |                                                                                     |  |  |  |  |  |  |  |  |
|    |                                                                                                              |                                                                                                                                                                                                                                                                                                                                                                        |                                                                                     |  |  |  |  |  |  |  |  |
|    |                                                                                                              |                                                                                                                                                                                                                                                                                                                                                                        |                                                                                     |  |  |  |  |  |  |  |  |
|    |                                                                                                              |                                                                                                                                                                                                                                                                                                                                                                        |                                                                                     |  |  |  |  |  |  |  |  |
| 8  | Patents planned, issued or pending                                                                           | <input checked="" type="checkbox"/> <b>None</b><br><table border="1" style="width: 100%; border-collapse: collapse;"> <tr><td style="width: 50%; height: 15px;"></td><td style="width: 50%;"></td></tr> <tr><td style="height: 15px;"></td><td></td></tr> <tr><td style="height: 15px;"></td><td></td></tr> </table>                                                   |                                                                                     |  |  |  |  |  |  |  |  |
|    |                                                                                                              |                                                                                                                                                                                                                                                                                                                                                                        |                                                                                     |  |  |  |  |  |  |  |  |
|    |                                                                                                              |                                                                                                                                                                                                                                                                                                                                                                        |                                                                                     |  |  |  |  |  |  |  |  |
|    |                                                                                                              |                                                                                                                                                                                                                                                                                                                                                                        |                                                                                     |  |  |  |  |  |  |  |  |
| 9  | Participation on a Data Safety Monitoring Board or Advisory Board                                            | <input checked="" type="checkbox"/> <b>None</b><br><table border="1" style="width: 100%; border-collapse: collapse;"> <tr><td style="width: 50%; height: 15px;"></td><td style="width: 50%;"></td></tr> <tr><td style="height: 15px;"></td><td></td></tr> <tr><td style="height: 15px;"></td><td></td></tr> </table>                                                   |                                                                                     |  |  |  |  |  |  |  |  |
|    |                                                                                                              |                                                                                                                                                                                                                                                                                                                                                                        |                                                                                     |  |  |  |  |  |  |  |  |
|    |                                                                                                              |                                                                                                                                                                                                                                                                                                                                                                        |                                                                                     |  |  |  |  |  |  |  |  |
|    |                                                                                                              |                                                                                                                                                                                                                                                                                                                                                                        |                                                                                     |  |  |  |  |  |  |  |  |
| 10 | Leadership or fiduciary role in other board, society, committee or advocacy group, paid or unpaid            | <input checked="" type="checkbox"/> <b>None</b><br><table border="1" style="width: 100%; border-collapse: collapse;"> <tr><td style="width: 50%; height: 15px;"></td><td style="width: 50%;"></td></tr> <tr><td style="height: 15px;"></td><td></td></tr> <tr><td style="height: 15px;"></td><td></td></tr> </table>                                                   |                                                                                     |  |  |  |  |  |  |  |  |
|    |                                                                                                              |                                                                                                                                                                                                                                                                                                                                                                        |                                                                                     |  |  |  |  |  |  |  |  |
|    |                                                                                                              |                                                                                                                                                                                                                                                                                                                                                                        |                                                                                     |  |  |  |  |  |  |  |  |
|    |                                                                                                              |                                                                                                                                                                                                                                                                                                                                                                        |                                                                                     |  |  |  |  |  |  |  |  |

|           |                                                                                  | Name all entities with whom you have this relationship or indicate none (add rows as needed)                                                                                                                                                                                                                         | Specifications/Comments (e.g., if payments were made to you or to your institution) |  |  |  |  |  |  |
|-----------|----------------------------------------------------------------------------------|----------------------------------------------------------------------------------------------------------------------------------------------------------------------------------------------------------------------------------------------------------------------------------------------------------------------|-------------------------------------------------------------------------------------|--|--|--|--|--|--|
| <b>11</b> | Stock or stock options                                                           | <input checked="" type="checkbox"/> <b>None</b><br><table border="1" style="width: 100%; border-collapse: collapse;"> <tr><td style="width: 50%; height: 15px;"></td><td style="width: 50%;"></td></tr> <tr><td style="height: 15px;"></td><td></td></tr> <tr><td style="height: 15px;"></td><td></td></tr> </table> |                                                                                     |  |  |  |  |  |  |
|           |                                                                                  |                                                                                                                                                                                                                                                                                                                      |                                                                                     |  |  |  |  |  |  |
|           |                                                                                  |                                                                                                                                                                                                                                                                                                                      |                                                                                     |  |  |  |  |  |  |
|           |                                                                                  |                                                                                                                                                                                                                                                                                                                      |                                                                                     |  |  |  |  |  |  |
| <b>12</b> | Receipt of equipment, materials, drugs, medical writing, gifts or other services | <input checked="" type="checkbox"/> <b>None</b><br><table border="1" style="width: 100%; border-collapse: collapse;"> <tr><td style="width: 50%; height: 15px;"></td><td style="width: 50%;"></td></tr> <tr><td style="height: 15px;"></td><td></td></tr> <tr><td style="height: 15px;"></td><td></td></tr> </table> |                                                                                     |  |  |  |  |  |  |
|           |                                                                                  |                                                                                                                                                                                                                                                                                                                      |                                                                                     |  |  |  |  |  |  |
|           |                                                                                  |                                                                                                                                                                                                                                                                                                                      |                                                                                     |  |  |  |  |  |  |
|           |                                                                                  |                                                                                                                                                                                                                                                                                                                      |                                                                                     |  |  |  |  |  |  |
| <b>13</b> | Other financial or non-financial interests                                       | <input checked="" type="checkbox"/> <b>None</b><br><table border="1" style="width: 100%; border-collapse: collapse;"> <tr><td style="width: 50%; height: 15px;"></td><td style="width: 50%;"></td></tr> <tr><td style="height: 15px;"></td><td></td></tr> <tr><td style="height: 15px;"></td><td></td></tr> </table> |                                                                                     |  |  |  |  |  |  |
|           |                                                                                  |                                                                                                                                                                                                                                                                                                                      |                                                                                     |  |  |  |  |  |  |
|           |                                                                                  |                                                                                                                                                                                                                                                                                                                      |                                                                                     |  |  |  |  |  |  |
|           |                                                                                  |                                                                                                                                                                                                                                                                                                                      |                                                                                     |  |  |  |  |  |  |

**Please place an "X" next to the following statement to indicate your agreement:**

I certify that I have answered every question and have not altered the wording of any of the questions on this form.

## ICMJE DISCLOSURE FORM

**Date:** 8/7/2021

**Your Name:** Manon Allaire

**Manuscript Title:** Patient and physician expectation's regarding disease and treatment of advanced HCC: the prospective PERCEPTION1 study

**Manuscript Number (if known):** JHEPR-D-24-00819

In the interest of transparency, we ask you to disclose all relationships/activities/interests listed below that are related to the content of your manuscript. "Related" means any relation with for-profit or not-for-profit third parties whose interests may be affected by the content of the manuscript. Disclosure represents a commitment to transparency and does not necessarily indicate a bias. If you are in doubt about whether to list a relationship/activity/interest, it is preferable that you do so.

The author's relationships/activities/interests should be defined broadly. For example, if your manuscript pertains to the epidemiology of hypertension, you should declare all relationships with manufacturers of antihypertensive medication, even if that medication is not mentioned in the manuscript.

In item #1 below, report all support for the work reported in this manuscript without time limit. For all other items, the time frame for disclosure is the past 36 months.

|                                                           |                                                                                                                                                                                | Name all entities with whom you have this relationship or indicate none (add rows as needed)                                                                                                                                               | Specifications/Comments (e.g., if payments were made to you or to your institution) |  |  |  |  |  |                                                                                                                                                                                                                                                                                                  |  |  |  |  |  |  |
|-----------------------------------------------------------|--------------------------------------------------------------------------------------------------------------------------------------------------------------------------------|--------------------------------------------------------------------------------------------------------------------------------------------------------------------------------------------------------------------------------------------|-------------------------------------------------------------------------------------|--|--|--|--|--|--------------------------------------------------------------------------------------------------------------------------------------------------------------------------------------------------------------------------------------------------------------------------------------------------|--|--|--|--|--|--|
| <b>Time frame: Since the initial planning of the work</b> |                                                                                                                                                                                |                                                                                                                                                                                                                                            |                                                                                     |  |  |  |  |  |                                                                                                                                                                                                                                                                                                  |  |  |  |  |  |  |
| <b>1</b>                                                  | All support for the present manuscript (e.g., funding, provision of study materials, medical writing, article processing charges, etc.)<br><b>No time limit for this item.</b> | <input checked="" type="checkbox"/> <b>None</b><br><table border="1" style="width: 100%; height: 40px; margin-top: 5px;"> <tr><td style="width: 60%;"></td><td></td></tr> <tr><td></td><td></td></tr> <tr><td></td><td></td></tr> </table> |                                                                                     |  |  |  |  |  | <table border="1" style="width: 100%; height: 40px; margin-top: 5px;"> <tr><td style="width: 60%;"></td><td></td></tr> <tr><td></td><td></td></tr> <tr><td></td><td></td></tr> </table> <p style="font-size: small; color: gray; margin-top: 5px;">Click the tab key to add additional rows.</p> |  |  |  |  |  |  |
|                                                           |                                                                                                                                                                                |                                                                                                                                                                                                                                            |                                                                                     |  |  |  |  |  |                                                                                                                                                                                                                                                                                                  |  |  |  |  |  |  |
|                                                           |                                                                                                                                                                                |                                                                                                                                                                                                                                            |                                                                                     |  |  |  |  |  |                                                                                                                                                                                                                                                                                                  |  |  |  |  |  |  |
|                                                           |                                                                                                                                                                                |                                                                                                                                                                                                                                            |                                                                                     |  |  |  |  |  |                                                                                                                                                                                                                                                                                                  |  |  |  |  |  |  |
|                                                           |                                                                                                                                                                                |                                                                                                                                                                                                                                            |                                                                                     |  |  |  |  |  |                                                                                                                                                                                                                                                                                                  |  |  |  |  |  |  |
|                                                           |                                                                                                                                                                                |                                                                                                                                                                                                                                            |                                                                                     |  |  |  |  |  |                                                                                                                                                                                                                                                                                                  |  |  |  |  |  |  |
|                                                           |                                                                                                                                                                                |                                                                                                                                                                                                                                            |                                                                                     |  |  |  |  |  |                                                                                                                                                                                                                                                                                                  |  |  |  |  |  |  |
| <b>Time frame: past 36 months</b>                         |                                                                                                                                                                                |                                                                                                                                                                                                                                            |                                                                                     |  |  |  |  |  |                                                                                                                                                                                                                                                                                                  |  |  |  |  |  |  |
| <b>2</b>                                                  | Grants or contracts from any entity (if not indicated in item #1 above).                                                                                                       | <input checked="" type="checkbox"/> <b>None</b><br><table border="1" style="width: 100%; height: 40px; margin-top: 5px;"> <tr><td style="width: 60%;"></td><td></td></tr> <tr><td></td><td></td></tr> <tr><td></td><td></td></tr> </table> |                                                                                     |  |  |  |  |  | <table border="1" style="width: 100%; height: 40px; margin-top: 5px;"> <tr><td style="width: 60%;"></td><td></td></tr> <tr><td></td><td></td></tr> <tr><td></td><td></td></tr> </table>                                                                                                          |  |  |  |  |  |  |
|                                                           |                                                                                                                                                                                |                                                                                                                                                                                                                                            |                                                                                     |  |  |  |  |  |                                                                                                                                                                                                                                                                                                  |  |  |  |  |  |  |
|                                                           |                                                                                                                                                                                |                                                                                                                                                                                                                                            |                                                                                     |  |  |  |  |  |                                                                                                                                                                                                                                                                                                  |  |  |  |  |  |  |
|                                                           |                                                                                                                                                                                |                                                                                                                                                                                                                                            |                                                                                     |  |  |  |  |  |                                                                                                                                                                                                                                                                                                  |  |  |  |  |  |  |
|                                                           |                                                                                                                                                                                |                                                                                                                                                                                                                                            |                                                                                     |  |  |  |  |  |                                                                                                                                                                                                                                                                                                  |  |  |  |  |  |  |
|                                                           |                                                                                                                                                                                |                                                                                                                                                                                                                                            |                                                                                     |  |  |  |  |  |                                                                                                                                                                                                                                                                                                  |  |  |  |  |  |  |
|                                                           |                                                                                                                                                                                |                                                                                                                                                                                                                                            |                                                                                     |  |  |  |  |  |                                                                                                                                                                                                                                                                                                  |  |  |  |  |  |  |
| <b>3</b>                                                  | Royalties or licenses                                                                                                                                                          | <input checked="" type="checkbox"/> <b>None</b><br><table border="1" style="width: 100%; height: 40px; margin-top: 5px;"> <tr><td style="width: 60%;"></td><td></td></tr> <tr><td></td><td></td></tr> <tr><td></td><td></td></tr> </table> |                                                                                     |  |  |  |  |  | <table border="1" style="width: 100%; height: 40px; margin-top: 5px;"> <tr><td style="width: 60%;"></td><td></td></tr> <tr><td></td><td></td></tr> <tr><td></td><td></td></tr> </table>                                                                                                          |  |  |  |  |  |  |
|                                                           |                                                                                                                                                                                |                                                                                                                                                                                                                                            |                                                                                     |  |  |  |  |  |                                                                                                                                                                                                                                                                                                  |  |  |  |  |  |  |
|                                                           |                                                                                                                                                                                |                                                                                                                                                                                                                                            |                                                                                     |  |  |  |  |  |                                                                                                                                                                                                                                                                                                  |  |  |  |  |  |  |
|                                                           |                                                                                                                                                                                |                                                                                                                                                                                                                                            |                                                                                     |  |  |  |  |  |                                                                                                                                                                                                                                                                                                  |  |  |  |  |  |  |
|                                                           |                                                                                                                                                                                |                                                                                                                                                                                                                                            |                                                                                     |  |  |  |  |  |                                                                                                                                                                                                                                                                                                  |  |  |  |  |  |  |
|                                                           |                                                                                                                                                                                |                                                                                                                                                                                                                                            |                                                                                     |  |  |  |  |  |                                                                                                                                                                                                                                                                                                  |  |  |  |  |  |  |
|                                                           |                                                                                                                                                                                |                                                                                                                                                                                                                                            |                                                                                     |  |  |  |  |  |                                                                                                                                                                                                                                                                                                  |  |  |  |  |  |  |



|              |                                                                                                              | Name all entities with whom you have this relationship or indicate none (add rows as needed)                                                                                      | Specifications/Comments (e.g., if payments were made to you or to your institution) |  |       |  |  |  |  |  |  |
|--------------|--------------------------------------------------------------------------------------------------------------|-----------------------------------------------------------------------------------------------------------------------------------------------------------------------------------|-------------------------------------------------------------------------------------|--|-------|--|--|--|--|--|--|
| 4            | Consulting fees                                                                                              | <input type="checkbox"/> None<br><table border="1"> <tr><td>Roche</td><td></td></tr> <tr><td></td><td></td></tr> <tr><td></td><td></td></tr> <tr><td></td><td></td></tr> </table> | Roche                                                                               |  |       |  |  |  |  |  |  |
| Roche        |                                                                                                              |                                                                                                                                                                                   |                                                                                     |  |       |  |  |  |  |  |  |
|              |                                                                                                              |                                                                                                                                                                                   |                                                                                     |  |       |  |  |  |  |  |  |
|              |                                                                                                              |                                                                                                                                                                                   |                                                                                     |  |       |  |  |  |  |  |  |
|              |                                                                                                              |                                                                                                                                                                                   |                                                                                     |  |       |  |  |  |  |  |  |
| 5            | Payment or honoraria for lectures, presentations, speakers bureaus, manuscript writing or educational events | <input type="checkbox"/> None<br><table border="1"> <tr><td>Astra Zeneca</td><td></td></tr> <tr><td>Roche</td><td></td></tr> <tr><td></td><td></td></tr> </table>                 | Astra Zeneca                                                                        |  | Roche |  |  |  |  |  |  |
| Astra Zeneca |                                                                                                              |                                                                                                                                                                                   |                                                                                     |  |       |  |  |  |  |  |  |
| Roche        |                                                                                                              |                                                                                                                                                                                   |                                                                                     |  |       |  |  |  |  |  |  |
|              |                                                                                                              |                                                                                                                                                                                   |                                                                                     |  |       |  |  |  |  |  |  |
| 6            | Payment for expert testimony                                                                                 | <input checked="" type="checkbox"/> None<br><table border="1"> <tr><td></td><td></td></tr> <tr><td></td><td></td></tr> <tr><td></td><td></td></tr> </table>                       |                                                                                     |  |       |  |  |  |  |  |  |
|              |                                                                                                              |                                                                                                                                                                                   |                                                                                     |  |       |  |  |  |  |  |  |
|              |                                                                                                              |                                                                                                                                                                                   |                                                                                     |  |       |  |  |  |  |  |  |
|              |                                                                                                              |                                                                                                                                                                                   |                                                                                     |  |       |  |  |  |  |  |  |
| 7            | Support for attending meetings and/or travel                                                                 | <input type="checkbox"/> None<br><table border="1"> <tr><td>Astra Zeneca</td><td></td></tr> <tr><td>Roche</td><td></td></tr> <tr><td></td><td></td></tr> </table>                 | Astra Zeneca                                                                        |  | Roche |  |  |  |  |  |  |
| Astra Zeneca |                                                                                                              |                                                                                                                                                                                   |                                                                                     |  |       |  |  |  |  |  |  |
| Roche        |                                                                                                              |                                                                                                                                                                                   |                                                                                     |  |       |  |  |  |  |  |  |
|              |                                                                                                              |                                                                                                                                                                                   |                                                                                     |  |       |  |  |  |  |  |  |
| 8            | Patents planned, issued or pending                                                                           | <input checked="" type="checkbox"/> None<br><table border="1"> <tr><td></td><td></td></tr> <tr><td></td><td></td></tr> <tr><td></td><td></td></tr> </table>                       |                                                                                     |  |       |  |  |  |  |  |  |
|              |                                                                                                              |                                                                                                                                                                                   |                                                                                     |  |       |  |  |  |  |  |  |
|              |                                                                                                              |                                                                                                                                                                                   |                                                                                     |  |       |  |  |  |  |  |  |
|              |                                                                                                              |                                                                                                                                                                                   |                                                                                     |  |       |  |  |  |  |  |  |
| 9            | Participation on a Data Safety Monitoring Board or Advisory Board                                            | <input checked="" type="checkbox"/> None<br><table border="1"> <tr><td></td><td></td></tr> <tr><td></td><td></td></tr> <tr><td></td><td></td></tr> </table>                       |                                                                                     |  |       |  |  |  |  |  |  |
|              |                                                                                                              |                                                                                                                                                                                   |                                                                                     |  |       |  |  |  |  |  |  |
|              |                                                                                                              |                                                                                                                                                                                   |                                                                                     |  |       |  |  |  |  |  |  |
|              |                                                                                                              |                                                                                                                                                                                   |                                                                                     |  |       |  |  |  |  |  |  |
| 10           | Leadership or fiduciary role in other board, society, committee or advocacy group, paid or unpaid            | <input checked="" type="checkbox"/> None<br><table border="1"> <tr><td></td><td></td></tr> <tr><td></td><td></td></tr> <tr><td></td><td></td></tr> </table>                       |                                                                                     |  |       |  |  |  |  |  |  |
|              |                                                                                                              |                                                                                                                                                                                   |                                                                                     |  |       |  |  |  |  |  |  |
|              |                                                                                                              |                                                                                                                                                                                   |                                                                                     |  |       |  |  |  |  |  |  |
|              |                                                                                                              |                                                                                                                                                                                   |                                                                                     |  |       |  |  |  |  |  |  |

|           |                                                                                  | Name all entities with whom you have this relationship or indicate none (add rows as needed) | Specifications/Comments (e.g., if payments were made to you or to your institution) |
|-----------|----------------------------------------------------------------------------------|----------------------------------------------------------------------------------------------|-------------------------------------------------------------------------------------|
| <b>11</b> | Stock or stock options                                                           | <input checked="" type="checkbox"/> <b>None</b>                                              |                                                                                     |
|           |                                                                                  |                                                                                              |                                                                                     |
|           |                                                                                  |                                                                                              |                                                                                     |
| <b>12</b> | Receipt of equipment, materials, drugs, medical writing, gifts or other services | <input checked="" type="checkbox"/> <b>None</b>                                              |                                                                                     |
|           |                                                                                  |                                                                                              |                                                                                     |
|           |                                                                                  |                                                                                              |                                                                                     |
| <b>13</b> | Other financial or non-financial interests                                       | <input checked="" type="checkbox"/> <b>None</b>                                              |                                                                                     |
|           |                                                                                  |                                                                                              |                                                                                     |
|           |                                                                                  |                                                                                              |                                                                                     |

Please place an "X" next to the following statement to indicate your agreement:

I certify that I have answered every question and have not altered the wording of any of the questions on this form.

## ICMJE DISCLOSURE FORM

**Date:** 8/7/2021

**Your Name:** Regnault

**Manuscript Title:** Patient and physician expectation's regarding disease and treatment of advanced HCC: the prospective PERCEPTION1 study

**Manuscript Number (if known):** JHEPR-D-24-00819

In the interest of transparency, we ask you to disclose all relationships/activities/interests listed below that are related to the content of your manuscript. "Related" means any relation with for-profit or not-for-profit third parties whose interests may be affected by the content of the manuscript. Disclosure represents a commitment to transparency and does not necessarily indicate a bias. If you are in doubt about whether to list a relationship/activity/interest, it is preferable that you do so.

The author's relationships/activities/interests should be defined broadly. For example, if your manuscript pertains to the epidemiology of hypertension, you should declare all relationships with manufacturers of antihypertensive medication, even if that medication is not mentioned in the manuscript.

In item #1 below, report all support for the work reported in this manuscript without time limit. For all other items, the time frame for disclosure is the past 36 months.

|                                                           | Name all entities with whom you have this relationship or indicate none (add rows as needed)                                                                                   | Specifications/Comments (e.g., if payments were made to you or to your institution)                                                                                                                                                                                                                                                                 |  |  |  |  |  |  |
|-----------------------------------------------------------|--------------------------------------------------------------------------------------------------------------------------------------------------------------------------------|-----------------------------------------------------------------------------------------------------------------------------------------------------------------------------------------------------------------------------------------------------------------------------------------------------------------------------------------------------|--|--|--|--|--|--|
| <b>Time frame: Since the initial planning of the work</b> |                                                                                                                                                                                |                                                                                                                                                                                                                                                                                                                                                     |  |  |  |  |  |  |
| <b>1</b>                                                  | All support for the present manuscript (e.g., funding, provision of study materials, medical writing, article processing charges, etc.)<br><b>No time limit for this item.</b> | <input checked="" type="checkbox"/> <b>None</b><br><table border="1" style="width: 100%; height: 40px; margin-top: 5px;"> <tr><td style="width: 60%;"></td><td></td></tr> <tr><td></td><td></td></tr> <tr><td></td><td></td></tr> </table> <p style="font-size: small; color: gray; margin-top: 5px;">Click the tab key to add additional rows.</p> |  |  |  |  |  |  |
|                                                           |                                                                                                                                                                                |                                                                                                                                                                                                                                                                                                                                                     |  |  |  |  |  |  |
|                                                           |                                                                                                                                                                                |                                                                                                                                                                                                                                                                                                                                                     |  |  |  |  |  |  |
|                                                           |                                                                                                                                                                                |                                                                                                                                                                                                                                                                                                                                                     |  |  |  |  |  |  |
| <b>Time frame: past 36 months</b>                         |                                                                                                                                                                                |                                                                                                                                                                                                                                                                                                                                                     |  |  |  |  |  |  |
| <b>2</b>                                                  | Grants or contracts from any entity (if not indicated in item #1 above).                                                                                                       | <input checked="" type="checkbox"/> <b>None</b><br><table border="1" style="width: 100%; height: 40px; margin-top: 5px;"> <tr><td style="width: 60%;"></td><td></td></tr> <tr><td></td><td></td></tr> <tr><td></td><td></td></tr> </table>                                                                                                          |  |  |  |  |  |  |
|                                                           |                                                                                                                                                                                |                                                                                                                                                                                                                                                                                                                                                     |  |  |  |  |  |  |
|                                                           |                                                                                                                                                                                |                                                                                                                                                                                                                                                                                                                                                     |  |  |  |  |  |  |
|                                                           |                                                                                                                                                                                |                                                                                                                                                                                                                                                                                                                                                     |  |  |  |  |  |  |
| <b>3</b>                                                  | Royalties or licenses                                                                                                                                                          | <input checked="" type="checkbox"/> <b>None</b><br><table border="1" style="width: 100%; height: 40px; margin-top: 5px;"> <tr><td style="width: 60%;"></td><td></td></tr> <tr><td></td><td></td></tr> <tr><td></td><td></td></tr> </table>                                                                                                          |  |  |  |  |  |  |
|                                                           |                                                                                                                                                                                |                                                                                                                                                                                                                                                                                                                                                     |  |  |  |  |  |  |
|                                                           |                                                                                                                                                                                |                                                                                                                                                                                                                                                                                                                                                     |  |  |  |  |  |  |
|                                                           |                                                                                                                                                                                |                                                                                                                                                                                                                                                                                                                                                     |  |  |  |  |  |  |

|    |                                                                                                              | Name all entities with whom you have this relationship or indicate none (add rows as needed)                                                                                                                                                                                                                                                                           | Specifications/Comments (e.g., if payments were made to you or to your institution) |  |  |  |  |  |  |  |  |
|----|--------------------------------------------------------------------------------------------------------------|------------------------------------------------------------------------------------------------------------------------------------------------------------------------------------------------------------------------------------------------------------------------------------------------------------------------------------------------------------------------|-------------------------------------------------------------------------------------|--|--|--|--|--|--|--|--|
| 4  | Consulting fees                                                                                              | <input checked="" type="checkbox"/> <b>None</b><br><table border="1" style="width: 100%; border-collapse: collapse;"> <tr><td style="width: 50%; height: 15px;"></td><td style="width: 50%;"></td></tr> <tr><td style="height: 15px;"></td><td></td></tr> <tr><td style="height: 15px;"></td><td></td></tr> <tr><td style="height: 15px;"></td><td></td></tr> </table> |                                                                                     |  |  |  |  |  |  |  |  |
|    |                                                                                                              |                                                                                                                                                                                                                                                                                                                                                                        |                                                                                     |  |  |  |  |  |  |  |  |
|    |                                                                                                              |                                                                                                                                                                                                                                                                                                                                                                        |                                                                                     |  |  |  |  |  |  |  |  |
|    |                                                                                                              |                                                                                                                                                                                                                                                                                                                                                                        |                                                                                     |  |  |  |  |  |  |  |  |
|    |                                                                                                              |                                                                                                                                                                                                                                                                                                                                                                        |                                                                                     |  |  |  |  |  |  |  |  |
| 5  | Payment or honoraria for lectures, presentations, speakers bureaus, manuscript writing or educational events | <input checked="" type="checkbox"/> <b>None</b><br><table border="1" style="width: 100%; border-collapse: collapse;"> <tr><td style="width: 50%; height: 15px;"></td><td style="width: 50%;"></td></tr> <tr><td style="height: 15px;"></td><td></td></tr> <tr><td style="height: 15px;"></td><td></td></tr> </table>                                                   |                                                                                     |  |  |  |  |  |  |  |  |
|    |                                                                                                              |                                                                                                                                                                                                                                                                                                                                                                        |                                                                                     |  |  |  |  |  |  |  |  |
|    |                                                                                                              |                                                                                                                                                                                                                                                                                                                                                                        |                                                                                     |  |  |  |  |  |  |  |  |
|    |                                                                                                              |                                                                                                                                                                                                                                                                                                                                                                        |                                                                                     |  |  |  |  |  |  |  |  |
| 6  | Payment for expert testimony                                                                                 | <input checked="" type="checkbox"/> <b>None</b><br><table border="1" style="width: 100%; border-collapse: collapse;"> <tr><td style="width: 50%; height: 15px;"></td><td style="width: 50%;"></td></tr> <tr><td style="height: 15px;"></td><td></td></tr> <tr><td style="height: 15px;"></td><td></td></tr> </table>                                                   |                                                                                     |  |  |  |  |  |  |  |  |
|    |                                                                                                              |                                                                                                                                                                                                                                                                                                                                                                        |                                                                                     |  |  |  |  |  |  |  |  |
|    |                                                                                                              |                                                                                                                                                                                                                                                                                                                                                                        |                                                                                     |  |  |  |  |  |  |  |  |
|    |                                                                                                              |                                                                                                                                                                                                                                                                                                                                                                        |                                                                                     |  |  |  |  |  |  |  |  |
| 7  | Support for attending meetings and/or travel                                                                 | <input checked="" type="checkbox"/> <b>None</b><br><table border="1" style="width: 100%; border-collapse: collapse;"> <tr><td style="width: 50%; height: 15px;"></td><td style="width: 50%;"></td></tr> <tr><td style="height: 15px;"></td><td></td></tr> <tr><td style="height: 15px;"></td><td></td></tr> </table>                                                   |                                                                                     |  |  |  |  |  |  |  |  |
|    |                                                                                                              |                                                                                                                                                                                                                                                                                                                                                                        |                                                                                     |  |  |  |  |  |  |  |  |
|    |                                                                                                              |                                                                                                                                                                                                                                                                                                                                                                        |                                                                                     |  |  |  |  |  |  |  |  |
|    |                                                                                                              |                                                                                                                                                                                                                                                                                                                                                                        |                                                                                     |  |  |  |  |  |  |  |  |
| 8  | Patents planned, issued or pending                                                                           | <input checked="" type="checkbox"/> <b>None</b><br><table border="1" style="width: 100%; border-collapse: collapse;"> <tr><td style="width: 50%; height: 15px;"></td><td style="width: 50%;"></td></tr> <tr><td style="height: 15px;"></td><td></td></tr> <tr><td style="height: 15px;"></td><td></td></tr> </table>                                                   |                                                                                     |  |  |  |  |  |  |  |  |
|    |                                                                                                              |                                                                                                                                                                                                                                                                                                                                                                        |                                                                                     |  |  |  |  |  |  |  |  |
|    |                                                                                                              |                                                                                                                                                                                                                                                                                                                                                                        |                                                                                     |  |  |  |  |  |  |  |  |
|    |                                                                                                              |                                                                                                                                                                                                                                                                                                                                                                        |                                                                                     |  |  |  |  |  |  |  |  |
| 9  | Participation on a Data Safety Monitoring Board or Advisory Board                                            | <input checked="" type="checkbox"/> <b>None</b><br><table border="1" style="width: 100%; border-collapse: collapse;"> <tr><td style="width: 50%; height: 15px;"></td><td style="width: 50%;"></td></tr> <tr><td style="height: 15px;"></td><td></td></tr> <tr><td style="height: 15px;"></td><td></td></tr> </table>                                                   |                                                                                     |  |  |  |  |  |  |  |  |
|    |                                                                                                              |                                                                                                                                                                                                                                                                                                                                                                        |                                                                                     |  |  |  |  |  |  |  |  |
|    |                                                                                                              |                                                                                                                                                                                                                                                                                                                                                                        |                                                                                     |  |  |  |  |  |  |  |  |
|    |                                                                                                              |                                                                                                                                                                                                                                                                                                                                                                        |                                                                                     |  |  |  |  |  |  |  |  |
| 10 | Leadership or fiduciary role in other board, society, committee or advocacy group, paid or unpaid            | <input checked="" type="checkbox"/> <b>None</b><br><table border="1" style="width: 100%; border-collapse: collapse;"> <tr><td style="width: 50%; height: 15px;"></td><td style="width: 50%;"></td></tr> <tr><td style="height: 15px;"></td><td></td></tr> <tr><td style="height: 15px;"></td><td></td></tr> </table>                                                   |                                                                                     |  |  |  |  |  |  |  |  |
|    |                                                                                                              |                                                                                                                                                                                                                                                                                                                                                                        |                                                                                     |  |  |  |  |  |  |  |  |
|    |                                                                                                              |                                                                                                                                                                                                                                                                                                                                                                        |                                                                                     |  |  |  |  |  |  |  |  |
|    |                                                                                                              |                                                                                                                                                                                                                                                                                                                                                                        |                                                                                     |  |  |  |  |  |  |  |  |

|           |                                                                                  | Name all entities with whom you have this relationship or indicate none (add rows as needed)                                                                                                                                                                                                                         | Specifications/Comments (e.g., if payments were made to you or to your institution) |  |  |  |  |  |  |
|-----------|----------------------------------------------------------------------------------|----------------------------------------------------------------------------------------------------------------------------------------------------------------------------------------------------------------------------------------------------------------------------------------------------------------------|-------------------------------------------------------------------------------------|--|--|--|--|--|--|
| <b>11</b> | Stock or stock options                                                           | <input checked="" type="checkbox"/> <b>None</b><br><table border="1" style="width: 100%; border-collapse: collapse;"> <tr><td style="width: 50%; height: 15px;"></td><td style="width: 50%;"></td></tr> <tr><td style="height: 15px;"></td><td></td></tr> <tr><td style="height: 15px;"></td><td></td></tr> </table> |                                                                                     |  |  |  |  |  |  |
|           |                                                                                  |                                                                                                                                                                                                                                                                                                                      |                                                                                     |  |  |  |  |  |  |
|           |                                                                                  |                                                                                                                                                                                                                                                                                                                      |                                                                                     |  |  |  |  |  |  |
|           |                                                                                  |                                                                                                                                                                                                                                                                                                                      |                                                                                     |  |  |  |  |  |  |
| <b>12</b> | Receipt of equipment, materials, drugs, medical writing, gifts or other services | <input checked="" type="checkbox"/> <b>None</b><br><table border="1" style="width: 100%; border-collapse: collapse;"> <tr><td style="width: 50%; height: 15px;"></td><td style="width: 50%;"></td></tr> <tr><td style="height: 15px;"></td><td></td></tr> <tr><td style="height: 15px;"></td><td></td></tr> </table> |                                                                                     |  |  |  |  |  |  |
|           |                                                                                  |                                                                                                                                                                                                                                                                                                                      |                                                                                     |  |  |  |  |  |  |
|           |                                                                                  |                                                                                                                                                                                                                                                                                                                      |                                                                                     |  |  |  |  |  |  |
|           |                                                                                  |                                                                                                                                                                                                                                                                                                                      |                                                                                     |  |  |  |  |  |  |
| <b>13</b> | Other financial or non-financial interests                                       | <input checked="" type="checkbox"/> <b>None</b><br><table border="1" style="width: 100%; border-collapse: collapse;"> <tr><td style="width: 50%; height: 15px;"></td><td style="width: 50%;"></td></tr> <tr><td style="height: 15px;"></td><td></td></tr> <tr><td style="height: 15px;"></td><td></td></tr> </table> |                                                                                     |  |  |  |  |  |  |
|           |                                                                                  |                                                                                                                                                                                                                                                                                                                      |                                                                                     |  |  |  |  |  |  |
|           |                                                                                  |                                                                                                                                                                                                                                                                                                                      |                                                                                     |  |  |  |  |  |  |
|           |                                                                                  |                                                                                                                                                                                                                                                                                                                      |                                                                                     |  |  |  |  |  |  |

**Please place an "X" next to the following statement to indicate your agreement:**

I certify that I have answered every question and have not altered the wording of any of the questions on this form.

## ICMJE DISCLOSURE FORM

**Date:** 8/7/2021

**Your Name:** Isabelle Colle

**Manuscript Title:** Patient and physician expectation's regarding disease and treatment of advanced HCC: the prospective PERCEPTION1 study

**Manuscript Number (if known):** JHEPR-D-24-00819

In the interest of transparency, we ask you to disclose all relationships/activities/interests listed below that are related to the content of your manuscript. "Related" means any relation with for-profit or not-for-profit third parties whose interests may be affected by the content of the manuscript. Disclosure represents a commitment to transparency and does not necessarily indicate a bias. If you are in doubt about whether to list a relationship/activity/interest, it is preferable that you do so.

The author's relationships/activities/interests should be defined broadly. For example, if your manuscript pertains to the epidemiology of hypertension, you should declare all relationships with manufacturers of antihypertensive medication, even if that medication is not mentioned in the manuscript.

In item #1 below, report all support for the work reported in this manuscript without time limit. For all other items, the time frame for disclosure is the past 36 months.

|                                                           |                                                                                                                                                                                | Name all entities with whom you have this relationship or indicate none (add rows as needed)                                                                                                                                               | Specifications/Comments (e.g., if payments were made to you or to your institution) |  |  |  |  |  |                                           |
|-----------------------------------------------------------|--------------------------------------------------------------------------------------------------------------------------------------------------------------------------------|--------------------------------------------------------------------------------------------------------------------------------------------------------------------------------------------------------------------------------------------|-------------------------------------------------------------------------------------|--|--|--|--|--|-------------------------------------------|
| <b>Time frame: Since the initial planning of the work</b> |                                                                                                                                                                                |                                                                                                                                                                                                                                            |                                                                                     |  |  |  |  |  |                                           |
| <b>1</b>                                                  | All support for the present manuscript (e.g., funding, provision of study materials, medical writing, article processing charges, etc.)<br><b>No time limit for this item.</b> | <input checked="" type="checkbox"/> <b>None</b><br><table border="1" style="width: 100%; height: 40px; margin-top: 5px;"> <tr><td style="width: 60%;"></td><td></td></tr> <tr><td></td><td></td></tr> <tr><td></td><td></td></tr> </table> |                                                                                     |  |  |  |  |  | Click the tab key to add additional rows. |
|                                                           |                                                                                                                                                                                |                                                                                                                                                                                                                                            |                                                                                     |  |  |  |  |  |                                           |
|                                                           |                                                                                                                                                                                |                                                                                                                                                                                                                                            |                                                                                     |  |  |  |  |  |                                           |
|                                                           |                                                                                                                                                                                |                                                                                                                                                                                                                                            |                                                                                     |  |  |  |  |  |                                           |
| <b>Time frame: past 36 months</b>                         |                                                                                                                                                                                |                                                                                                                                                                                                                                            |                                                                                     |  |  |  |  |  |                                           |
| <b>2</b>                                                  | Grants or contracts from any entity (if not indicated in item #1 above).                                                                                                       | <input checked="" type="checkbox"/> <b>None</b><br><table border="1" style="width: 100%; height: 40px; margin-top: 5px;"> <tr><td style="width: 60%;"></td><td></td></tr> <tr><td></td><td></td></tr> <tr><td></td><td></td></tr> </table> |                                                                                     |  |  |  |  |  |                                           |
|                                                           |                                                                                                                                                                                |                                                                                                                                                                                                                                            |                                                                                     |  |  |  |  |  |                                           |
|                                                           |                                                                                                                                                                                |                                                                                                                                                                                                                                            |                                                                                     |  |  |  |  |  |                                           |
|                                                           |                                                                                                                                                                                |                                                                                                                                                                                                                                            |                                                                                     |  |  |  |  |  |                                           |
| <b>3</b>                                                  | Royalties or licenses                                                                                                                                                          | <input checked="" type="checkbox"/> <b>None</b><br><table border="1" style="width: 100%; height: 40px; margin-top: 5px;"> <tr><td style="width: 60%;"></td><td></td></tr> <tr><td></td><td></td></tr> <tr><td></td><td></td></tr> </table> |                                                                                     |  |  |  |  |  |                                           |
|                                                           |                                                                                                                                                                                |                                                                                                                                                                                                                                            |                                                                                     |  |  |  |  |  |                                           |
|                                                           |                                                                                                                                                                                |                                                                                                                                                                                                                                            |                                                                                     |  |  |  |  |  |                                           |
|                                                           |                                                                                                                                                                                |                                                                                                                                                                                                                                            |                                                                                     |  |  |  |  |  |                                           |

|    |                                                                                                              | Name all entities with whom you have this relationship or indicate none (add rows as needed)                                                                                                                                                                                                                                                                           | Specifications/Comments (e.g., if payments were made to you or to your institution) |  |  |  |  |  |  |  |  |
|----|--------------------------------------------------------------------------------------------------------------|------------------------------------------------------------------------------------------------------------------------------------------------------------------------------------------------------------------------------------------------------------------------------------------------------------------------------------------------------------------------|-------------------------------------------------------------------------------------|--|--|--|--|--|--|--|--|
| 4  | Consulting fees                                                                                              | <input checked="" type="checkbox"/> <b>None</b><br><table border="1" style="width: 100%; border-collapse: collapse;"> <tr><td style="width: 50%; height: 15px;"></td><td style="width: 50%;"></td></tr> <tr><td style="height: 15px;"></td><td></td></tr> <tr><td style="height: 15px;"></td><td></td></tr> <tr><td style="height: 15px;"></td><td></td></tr> </table> |                                                                                     |  |  |  |  |  |  |  |  |
|    |                                                                                                              |                                                                                                                                                                                                                                                                                                                                                                        |                                                                                     |  |  |  |  |  |  |  |  |
|    |                                                                                                              |                                                                                                                                                                                                                                                                                                                                                                        |                                                                                     |  |  |  |  |  |  |  |  |
|    |                                                                                                              |                                                                                                                                                                                                                                                                                                                                                                        |                                                                                     |  |  |  |  |  |  |  |  |
|    |                                                                                                              |                                                                                                                                                                                                                                                                                                                                                                        |                                                                                     |  |  |  |  |  |  |  |  |
| 5  | Payment or honoraria for lectures, presentations, speakers bureaus, manuscript writing or educational events | <input checked="" type="checkbox"/> <b>None</b><br><table border="1" style="width: 100%; border-collapse: collapse;"> <tr><td style="width: 50%; height: 15px;"></td><td style="width: 50%;"></td></tr> <tr><td style="height: 15px;"></td><td></td></tr> <tr><td style="height: 15px;"></td><td></td></tr> </table>                                                   |                                                                                     |  |  |  |  |  |  |  |  |
|    |                                                                                                              |                                                                                                                                                                                                                                                                                                                                                                        |                                                                                     |  |  |  |  |  |  |  |  |
|    |                                                                                                              |                                                                                                                                                                                                                                                                                                                                                                        |                                                                                     |  |  |  |  |  |  |  |  |
|    |                                                                                                              |                                                                                                                                                                                                                                                                                                                                                                        |                                                                                     |  |  |  |  |  |  |  |  |
| 6  | Payment for expert testimony                                                                                 | <input checked="" type="checkbox"/> <b>None</b><br><table border="1" style="width: 100%; border-collapse: collapse;"> <tr><td style="width: 50%; height: 15px;"></td><td style="width: 50%;"></td></tr> <tr><td style="height: 15px;"></td><td></td></tr> <tr><td style="height: 15px;"></td><td></td></tr> </table>                                                   |                                                                                     |  |  |  |  |  |  |  |  |
|    |                                                                                                              |                                                                                                                                                                                                                                                                                                                                                                        |                                                                                     |  |  |  |  |  |  |  |  |
|    |                                                                                                              |                                                                                                                                                                                                                                                                                                                                                                        |                                                                                     |  |  |  |  |  |  |  |  |
|    |                                                                                                              |                                                                                                                                                                                                                                                                                                                                                                        |                                                                                     |  |  |  |  |  |  |  |  |
| 7  | Support for attending meetings and/or travel                                                                 | <input checked="" type="checkbox"/> <b>None</b><br><table border="1" style="width: 100%; border-collapse: collapse;"> <tr><td style="width: 50%; height: 15px;"></td><td style="width: 50%;"></td></tr> <tr><td style="height: 15px;"></td><td></td></tr> <tr><td style="height: 15px;"></td><td></td></tr> </table>                                                   |                                                                                     |  |  |  |  |  |  |  |  |
|    |                                                                                                              |                                                                                                                                                                                                                                                                                                                                                                        |                                                                                     |  |  |  |  |  |  |  |  |
|    |                                                                                                              |                                                                                                                                                                                                                                                                                                                                                                        |                                                                                     |  |  |  |  |  |  |  |  |
|    |                                                                                                              |                                                                                                                                                                                                                                                                                                                                                                        |                                                                                     |  |  |  |  |  |  |  |  |
| 8  | Patents planned, issued or pending                                                                           | <input checked="" type="checkbox"/> <b>None</b><br><table border="1" style="width: 100%; border-collapse: collapse;"> <tr><td style="width: 50%; height: 15px;"></td><td style="width: 50%;"></td></tr> <tr><td style="height: 15px;"></td><td></td></tr> <tr><td style="height: 15px;"></td><td></td></tr> </table>                                                   |                                                                                     |  |  |  |  |  |  |  |  |
|    |                                                                                                              |                                                                                                                                                                                                                                                                                                                                                                        |                                                                                     |  |  |  |  |  |  |  |  |
|    |                                                                                                              |                                                                                                                                                                                                                                                                                                                                                                        |                                                                                     |  |  |  |  |  |  |  |  |
|    |                                                                                                              |                                                                                                                                                                                                                                                                                                                                                                        |                                                                                     |  |  |  |  |  |  |  |  |
| 9  | Participation on a Data Safety Monitoring Board or Advisory Board                                            | <input checked="" type="checkbox"/> <b>None</b><br><table border="1" style="width: 100%; border-collapse: collapse;"> <tr><td style="width: 50%; height: 15px;"></td><td style="width: 50%;"></td></tr> <tr><td style="height: 15px;"></td><td></td></tr> <tr><td style="height: 15px;"></td><td></td></tr> </table>                                                   |                                                                                     |  |  |  |  |  |  |  |  |
|    |                                                                                                              |                                                                                                                                                                                                                                                                                                                                                                        |                                                                                     |  |  |  |  |  |  |  |  |
|    |                                                                                                              |                                                                                                                                                                                                                                                                                                                                                                        |                                                                                     |  |  |  |  |  |  |  |  |
|    |                                                                                                              |                                                                                                                                                                                                                                                                                                                                                                        |                                                                                     |  |  |  |  |  |  |  |  |
| 10 | Leadership or fiduciary role in other board, society, committee or advocacy group, paid or unpaid            | <input checked="" type="checkbox"/> <b>None</b><br><table border="1" style="width: 100%; border-collapse: collapse;"> <tr><td style="width: 50%; height: 15px;"></td><td style="width: 50%;"></td></tr> <tr><td style="height: 15px;"></td><td></td></tr> <tr><td style="height: 15px;"></td><td></td></tr> </table>                                                   |                                                                                     |  |  |  |  |  |  |  |  |
|    |                                                                                                              |                                                                                                                                                                                                                                                                                                                                                                        |                                                                                     |  |  |  |  |  |  |  |  |
|    |                                                                                                              |                                                                                                                                                                                                                                                                                                                                                                        |                                                                                     |  |  |  |  |  |  |  |  |
|    |                                                                                                              |                                                                                                                                                                                                                                                                                                                                                                        |                                                                                     |  |  |  |  |  |  |  |  |

|           |                                                                                  | Name all entities with whom you have this relationship or indicate none (add rows as needed)                                                                                                                                                                                                                         | Specifications/Comments (e.g., if payments were made to you or to your institution) |  |  |  |  |  |  |
|-----------|----------------------------------------------------------------------------------|----------------------------------------------------------------------------------------------------------------------------------------------------------------------------------------------------------------------------------------------------------------------------------------------------------------------|-------------------------------------------------------------------------------------|--|--|--|--|--|--|
| <b>11</b> | Stock or stock options                                                           | <input checked="" type="checkbox"/> <b>None</b><br><table border="1" style="width: 100%; border-collapse: collapse;"> <tr><td style="width: 50%; height: 20px;"></td><td style="width: 50%;"></td></tr> <tr><td style="height: 20px;"></td><td></td></tr> <tr><td style="height: 20px;"></td><td></td></tr> </table> |                                                                                     |  |  |  |  |  |  |
|           |                                                                                  |                                                                                                                                                                                                                                                                                                                      |                                                                                     |  |  |  |  |  |  |
|           |                                                                                  |                                                                                                                                                                                                                                                                                                                      |                                                                                     |  |  |  |  |  |  |
|           |                                                                                  |                                                                                                                                                                                                                                                                                                                      |                                                                                     |  |  |  |  |  |  |
| <b>12</b> | Receipt of equipment, materials, drugs, medical writing, gifts or other services | <input checked="" type="checkbox"/> <b>None</b><br><table border="1" style="width: 100%; border-collapse: collapse;"> <tr><td style="width: 50%; height: 20px;"></td><td style="width: 50%;"></td></tr> <tr><td style="height: 20px;"></td><td></td></tr> <tr><td style="height: 20px;"></td><td></td></tr> </table> |                                                                                     |  |  |  |  |  |  |
|           |                                                                                  |                                                                                                                                                                                                                                                                                                                      |                                                                                     |  |  |  |  |  |  |
|           |                                                                                  |                                                                                                                                                                                                                                                                                                                      |                                                                                     |  |  |  |  |  |  |
|           |                                                                                  |                                                                                                                                                                                                                                                                                                                      |                                                                                     |  |  |  |  |  |  |
| <b>13</b> | Other financial or non-financial interests                                       | <input checked="" type="checkbox"/> <b>None</b><br><table border="1" style="width: 100%; border-collapse: collapse;"> <tr><td style="width: 50%; height: 20px;"></td><td style="width: 50%;"></td></tr> <tr><td style="height: 20px;"></td><td></td></tr> <tr><td style="height: 20px;"></td><td></td></tr> </table> |                                                                                     |  |  |  |  |  |  |
|           |                                                                                  |                                                                                                                                                                                                                                                                                                                      |                                                                                     |  |  |  |  |  |  |
|           |                                                                                  |                                                                                                                                                                                                                                                                                                                      |                                                                                     |  |  |  |  |  |  |
|           |                                                                                  |                                                                                                                                                                                                                                                                                                                      |                                                                                     |  |  |  |  |  |  |

**Please place an "X" next to the following statement to indicate your agreement:**

I certify that I have answered every question and have not altered the wording of any of the questions on this form.



## ICMJE DISCLOSURE FORM

**Date:** 8/7/2021

**Your Name:** Hans Orlent

**Manuscript Title:** Patient and physician expectation's regarding disease and treatment of advanced HCC: the prospective PERCEPTION1 study

**Manuscript Number (if known):** JHEPR-D-24-00819

In the interest of transparency, we ask you to disclose all relationships/activities/interests listed below that are related to the content of your manuscript. "Related" means any relation with for-profit or not-for-profit third parties whose interests may be affected by the content of the manuscript. Disclosure represents a commitment to transparency and does not necessarily indicate a bias. If you are in doubt about whether to list a relationship/activity/interest, it is preferable that you do so.

The author's relationships/activities/interests should be defined broadly. For example, if your manuscript pertains to the epidemiology of hypertension, you should declare all relationships with manufacturers of antihypertensive medication, even if that medication is not mentioned in the manuscript.

In item #1 below, report all support for the work reported in this manuscript without time limit. For all other items, the time frame for disclosure is the past 36 months.

|                                                           |                                                                                                                                                                                | Name all entities with whom you have this relationship or indicate none (add rows as needed)                                                                                                                                               | Specifications/Comments (e.g., if payments were made to you or to your institution) |  |  |  |  |  |                                                                                                                                                                                                                                                                                                  |  |  |  |  |  |  |
|-----------------------------------------------------------|--------------------------------------------------------------------------------------------------------------------------------------------------------------------------------|--------------------------------------------------------------------------------------------------------------------------------------------------------------------------------------------------------------------------------------------|-------------------------------------------------------------------------------------|--|--|--|--|--|--------------------------------------------------------------------------------------------------------------------------------------------------------------------------------------------------------------------------------------------------------------------------------------------------|--|--|--|--|--|--|
| <b>Time frame: Since the initial planning of the work</b> |                                                                                                                                                                                |                                                                                                                                                                                                                                            |                                                                                     |  |  |  |  |  |                                                                                                                                                                                                                                                                                                  |  |  |  |  |  |  |
| <b>1</b>                                                  | All support for the present manuscript (e.g., funding, provision of study materials, medical writing, article processing charges, etc.)<br><b>No time limit for this item.</b> | <input checked="" type="checkbox"/> <b>None</b><br><table border="1" style="width: 100%; height: 40px; margin-top: 5px;"> <tr><td style="width: 60%;"></td><td></td></tr> <tr><td></td><td></td></tr> <tr><td></td><td></td></tr> </table> |                                                                                     |  |  |  |  |  | <table border="1" style="width: 100%; height: 40px; margin-top: 5px;"> <tr><td style="width: 60%;"></td><td></td></tr> <tr><td></td><td></td></tr> <tr><td></td><td></td></tr> </table> <p style="font-size: small; color: gray; margin-top: 5px;">Click the tab key to add additional rows.</p> |  |  |  |  |  |  |
|                                                           |                                                                                                                                                                                |                                                                                                                                                                                                                                            |                                                                                     |  |  |  |  |  |                                                                                                                                                                                                                                                                                                  |  |  |  |  |  |  |
|                                                           |                                                                                                                                                                                |                                                                                                                                                                                                                                            |                                                                                     |  |  |  |  |  |                                                                                                                                                                                                                                                                                                  |  |  |  |  |  |  |
|                                                           |                                                                                                                                                                                |                                                                                                                                                                                                                                            |                                                                                     |  |  |  |  |  |                                                                                                                                                                                                                                                                                                  |  |  |  |  |  |  |
|                                                           |                                                                                                                                                                                |                                                                                                                                                                                                                                            |                                                                                     |  |  |  |  |  |                                                                                                                                                                                                                                                                                                  |  |  |  |  |  |  |
|                                                           |                                                                                                                                                                                |                                                                                                                                                                                                                                            |                                                                                     |  |  |  |  |  |                                                                                                                                                                                                                                                                                                  |  |  |  |  |  |  |
|                                                           |                                                                                                                                                                                |                                                                                                                                                                                                                                            |                                                                                     |  |  |  |  |  |                                                                                                                                                                                                                                                                                                  |  |  |  |  |  |  |
| <b>Time frame: past 36 months</b>                         |                                                                                                                                                                                |                                                                                                                                                                                                                                            |                                                                                     |  |  |  |  |  |                                                                                                                                                                                                                                                                                                  |  |  |  |  |  |  |
| <b>2</b>                                                  | Grants or contracts from any entity (if not indicated in item #1 above).                                                                                                       | <input checked="" type="checkbox"/> <b>None</b><br><table border="1" style="width: 100%; height: 40px; margin-top: 5px;"> <tr><td style="width: 60%;"></td><td></td></tr> <tr><td></td><td></td></tr> <tr><td></td><td></td></tr> </table> |                                                                                     |  |  |  |  |  | <table border="1" style="width: 100%; height: 40px; margin-top: 5px;"> <tr><td style="width: 60%;"></td><td></td></tr> <tr><td></td><td></td></tr> <tr><td></td><td></td></tr> </table>                                                                                                          |  |  |  |  |  |  |
|                                                           |                                                                                                                                                                                |                                                                                                                                                                                                                                            |                                                                                     |  |  |  |  |  |                                                                                                                                                                                                                                                                                                  |  |  |  |  |  |  |
|                                                           |                                                                                                                                                                                |                                                                                                                                                                                                                                            |                                                                                     |  |  |  |  |  |                                                                                                                                                                                                                                                                                                  |  |  |  |  |  |  |
|                                                           |                                                                                                                                                                                |                                                                                                                                                                                                                                            |                                                                                     |  |  |  |  |  |                                                                                                                                                                                                                                                                                                  |  |  |  |  |  |  |
|                                                           |                                                                                                                                                                                |                                                                                                                                                                                                                                            |                                                                                     |  |  |  |  |  |                                                                                                                                                                                                                                                                                                  |  |  |  |  |  |  |
|                                                           |                                                                                                                                                                                |                                                                                                                                                                                                                                            |                                                                                     |  |  |  |  |  |                                                                                                                                                                                                                                                                                                  |  |  |  |  |  |  |
|                                                           |                                                                                                                                                                                |                                                                                                                                                                                                                                            |                                                                                     |  |  |  |  |  |                                                                                                                                                                                                                                                                                                  |  |  |  |  |  |  |
| <b>3</b>                                                  | Royalties or licenses                                                                                                                                                          | <input checked="" type="checkbox"/> <b>None</b><br><table border="1" style="width: 100%; height: 40px; margin-top: 5px;"> <tr><td style="width: 60%;"></td><td></td></tr> <tr><td></td><td></td></tr> <tr><td></td><td></td></tr> </table> |                                                                                     |  |  |  |  |  | <table border="1" style="width: 100%; height: 40px; margin-top: 5px;"> <tr><td style="width: 60%;"></td><td></td></tr> <tr><td></td><td></td></tr> <tr><td></td><td></td></tr> </table>                                                                                                          |  |  |  |  |  |  |
|                                                           |                                                                                                                                                                                |                                                                                                                                                                                                                                            |                                                                                     |  |  |  |  |  |                                                                                                                                                                                                                                                                                                  |  |  |  |  |  |  |
|                                                           |                                                                                                                                                                                |                                                                                                                                                                                                                                            |                                                                                     |  |  |  |  |  |                                                                                                                                                                                                                                                                                                  |  |  |  |  |  |  |
|                                                           |                                                                                                                                                                                |                                                                                                                                                                                                                                            |                                                                                     |  |  |  |  |  |                                                                                                                                                                                                                                                                                                  |  |  |  |  |  |  |
|                                                           |                                                                                                                                                                                |                                                                                                                                                                                                                                            |                                                                                     |  |  |  |  |  |                                                                                                                                                                                                                                                                                                  |  |  |  |  |  |  |
|                                                           |                                                                                                                                                                                |                                                                                                                                                                                                                                            |                                                                                     |  |  |  |  |  |                                                                                                                                                                                                                                                                                                  |  |  |  |  |  |  |
|                                                           |                                                                                                                                                                                |                                                                                                                                                                                                                                            |                                                                                     |  |  |  |  |  |                                                                                                                                                                                                                                                                                                  |  |  |  |  |  |  |

|    |                                                                                                              | Name all entities with whom you have this relationship or indicate none (add rows as needed)                                                                                                                                                                                                                                                                           | Specifications/Comments (e.g., if payments were made to you or to your institution) |  |  |  |  |  |  |  |  |
|----|--------------------------------------------------------------------------------------------------------------|------------------------------------------------------------------------------------------------------------------------------------------------------------------------------------------------------------------------------------------------------------------------------------------------------------------------------------------------------------------------|-------------------------------------------------------------------------------------|--|--|--|--|--|--|--|--|
| 4  | Consulting fees                                                                                              | <input checked="" type="checkbox"/> <b>None</b><br><table border="1" style="width: 100%; border-collapse: collapse;"> <tr><td style="width: 50%; height: 15px;"></td><td style="width: 50%;"></td></tr> <tr><td style="height: 15px;"></td><td></td></tr> <tr><td style="height: 15px;"></td><td></td></tr> <tr><td style="height: 15px;"></td><td></td></tr> </table> |                                                                                     |  |  |  |  |  |  |  |  |
|    |                                                                                                              |                                                                                                                                                                                                                                                                                                                                                                        |                                                                                     |  |  |  |  |  |  |  |  |
|    |                                                                                                              |                                                                                                                                                                                                                                                                                                                                                                        |                                                                                     |  |  |  |  |  |  |  |  |
|    |                                                                                                              |                                                                                                                                                                                                                                                                                                                                                                        |                                                                                     |  |  |  |  |  |  |  |  |
|    |                                                                                                              |                                                                                                                                                                                                                                                                                                                                                                        |                                                                                     |  |  |  |  |  |  |  |  |
| 5  | Payment or honoraria for lectures, presentations, speakers bureaus, manuscript writing or educational events | <input checked="" type="checkbox"/> <b>None</b><br><table border="1" style="width: 100%; border-collapse: collapse;"> <tr><td style="width: 50%; height: 15px;"></td><td style="width: 50%;"></td></tr> <tr><td style="height: 15px;"></td><td></td></tr> <tr><td style="height: 15px;"></td><td></td></tr> </table>                                                   |                                                                                     |  |  |  |  |  |  |  |  |
|    |                                                                                                              |                                                                                                                                                                                                                                                                                                                                                                        |                                                                                     |  |  |  |  |  |  |  |  |
|    |                                                                                                              |                                                                                                                                                                                                                                                                                                                                                                        |                                                                                     |  |  |  |  |  |  |  |  |
|    |                                                                                                              |                                                                                                                                                                                                                                                                                                                                                                        |                                                                                     |  |  |  |  |  |  |  |  |
| 6  | Payment for expert testimony                                                                                 | <input type="checkbox"/> <b>None</b><br><table border="1" style="width: 100%; border-collapse: collapse;"> <tr><td style="width: 50%; height: 15px;"></td><td style="width: 50%;"></td></tr> <tr><td style="height: 15px;"></td><td></td></tr> <tr><td style="height: 15px;"></td><td></td></tr> </table>                                                              |                                                                                     |  |  |  |  |  |  |  |  |
|    |                                                                                                              |                                                                                                                                                                                                                                                                                                                                                                        |                                                                                     |  |  |  |  |  |  |  |  |
|    |                                                                                                              |                                                                                                                                                                                                                                                                                                                                                                        |                                                                                     |  |  |  |  |  |  |  |  |
|    |                                                                                                              |                                                                                                                                                                                                                                                                                                                                                                        |                                                                                     |  |  |  |  |  |  |  |  |
| 7  | Support for attending meetings and/or travel                                                                 | <input type="checkbox"/> <b>None</b><br><table border="1" style="width: 100%; border-collapse: collapse;"> <tr><td style="width: 50%; height: 15px;"></td><td style="width: 50%;"></td></tr> <tr><td style="height: 15px;"></td><td></td></tr> <tr><td style="height: 15px;"></td><td></td></tr> </table>                                                              |                                                                                     |  |  |  |  |  |  |  |  |
|    |                                                                                                              |                                                                                                                                                                                                                                                                                                                                                                        |                                                                                     |  |  |  |  |  |  |  |  |
|    |                                                                                                              |                                                                                                                                                                                                                                                                                                                                                                        |                                                                                     |  |  |  |  |  |  |  |  |
|    |                                                                                                              |                                                                                                                                                                                                                                                                                                                                                                        |                                                                                     |  |  |  |  |  |  |  |  |
| 8  | Patents planned, issued or pending                                                                           | <input checked="" type="checkbox"/> <b>None</b><br><table border="1" style="width: 100%; border-collapse: collapse;"> <tr><td style="width: 50%; height: 15px;"></td><td style="width: 50%;"></td></tr> <tr><td style="height: 15px;"></td><td></td></tr> <tr><td style="height: 15px;"></td><td></td></tr> </table>                                                   |                                                                                     |  |  |  |  |  |  |  |  |
|    |                                                                                                              |                                                                                                                                                                                                                                                                                                                                                                        |                                                                                     |  |  |  |  |  |  |  |  |
|    |                                                                                                              |                                                                                                                                                                                                                                                                                                                                                                        |                                                                                     |  |  |  |  |  |  |  |  |
|    |                                                                                                              |                                                                                                                                                                                                                                                                                                                                                                        |                                                                                     |  |  |  |  |  |  |  |  |
| 9  | Participation on a Data Safety Monitoring Board or Advisory Board                                            | <input checked="" type="checkbox"/> <b>None</b><br><table border="1" style="width: 100%; border-collapse: collapse;"> <tr><td style="width: 50%; height: 15px;"></td><td style="width: 50%;"></td></tr> <tr><td style="height: 15px;"></td><td></td></tr> <tr><td style="height: 15px;"></td><td></td></tr> </table>                                                   |                                                                                     |  |  |  |  |  |  |  |  |
|    |                                                                                                              |                                                                                                                                                                                                                                                                                                                                                                        |                                                                                     |  |  |  |  |  |  |  |  |
|    |                                                                                                              |                                                                                                                                                                                                                                                                                                                                                                        |                                                                                     |  |  |  |  |  |  |  |  |
|    |                                                                                                              |                                                                                                                                                                                                                                                                                                                                                                        |                                                                                     |  |  |  |  |  |  |  |  |
| 10 | Leadership or fiduciary role in other board, society, committee or advocacy group, paid or unpaid            | <input checked="" type="checkbox"/> <b>None</b><br><table border="1" style="width: 100%; border-collapse: collapse;"> <tr><td style="width: 50%; height: 15px;"></td><td style="width: 50%;"></td></tr> <tr><td style="height: 15px;"></td><td></td></tr> <tr><td style="height: 15px;"></td><td></td></tr> </table>                                                   |                                                                                     |  |  |  |  |  |  |  |  |
|    |                                                                                                              |                                                                                                                                                                                                                                                                                                                                                                        |                                                                                     |  |  |  |  |  |  |  |  |
|    |                                                                                                              |                                                                                                                                                                                                                                                                                                                                                                        |                                                                                     |  |  |  |  |  |  |  |  |
|    |                                                                                                              |                                                                                                                                                                                                                                                                                                                                                                        |                                                                                     |  |  |  |  |  |  |  |  |

|    |                                                                                  | Name all entities with whom you have this relationship or indicate none (add rows as needed) | Specifications/Comments (e.g., if payments were made to you or to your institution) |
|----|----------------------------------------------------------------------------------|----------------------------------------------------------------------------------------------|-------------------------------------------------------------------------------------|
| 11 | Stock or stock options                                                           | <input checked="" type="checkbox"/> None                                                     |                                                                                     |
|    |                                                                                  |                                                                                              |                                                                                     |
|    |                                                                                  |                                                                                              |                                                                                     |
|    |                                                                                  |                                                                                              |                                                                                     |
| 12 | Receipt of equipment, materials, drugs, medical writing, gifts or other services | <input checked="" type="checkbox"/> None                                                     |                                                                                     |
|    |                                                                                  |                                                                                              |                                                                                     |
|    |                                                                                  |                                                                                              |                                                                                     |
|    |                                                                                  |                                                                                              |                                                                                     |
| 13 | Other financial or non-financial interests                                       | <input checked="" type="checkbox"/> None                                                     |                                                                                     |
|    |                                                                                  |                                                                                              |                                                                                     |
|    |                                                                                  |                                                                                              |                                                                                     |
|    |                                                                                  |                                                                                              |                                                                                     |

Please place an "X" next to the following statement to indicate your agreement:

I certify that I have answered every question and have not altered the wording of any of the questions on this form.

## ICMJE DISCLOSURE FORM

**Date:** 8/7/2021

**Your Name:** Isabelle SINAPI

**Manuscript Title:** Patient and physician expectation's regarding disease and treatment of advanced HCC: the prospective PERCEPTION1 study

**Manuscript Number (if known):** JHEPR-D-24-00819

In the interest of transparency, we ask you to disclose all relationships/activities/interests listed below that are related to the content of your manuscript. "Related" means any relation with for-profit or not-for-profit third parties whose interests may be affected by the content of the manuscript. Disclosure represents a commitment to transparency and does not necessarily indicate a bias. If you are in doubt about whether to list a relationship/activity/interest, it is preferable that you do so.

The author's relationships/activities/interests should be defined broadly. For example, if your manuscript pertains to the epidemiology of hypertension, you should declare all relationships with manufacturers of antihypertensive medication, even if that medication is not mentioned in the manuscript.

In item #1 below, report all support for the work reported in this manuscript without time limit. For all other items, the time frame for disclosure is the past 36 months.

|                                                           |                                                                                                                                                                                | Name all entities with whom you have this relationship or indicate none (add rows as needed)                                                                                                                                               | Specifications/Comments (e.g., if payments were made to you or to your institution) |  |  |  |  |  |                                                                                                                                                                                                                                                                                                  |  |  |  |  |  |  |
|-----------------------------------------------------------|--------------------------------------------------------------------------------------------------------------------------------------------------------------------------------|--------------------------------------------------------------------------------------------------------------------------------------------------------------------------------------------------------------------------------------------|-------------------------------------------------------------------------------------|--|--|--|--|--|--------------------------------------------------------------------------------------------------------------------------------------------------------------------------------------------------------------------------------------------------------------------------------------------------|--|--|--|--|--|--|
| <b>Time frame: Since the initial planning of the work</b> |                                                                                                                                                                                |                                                                                                                                                                                                                                            |                                                                                     |  |  |  |  |  |                                                                                                                                                                                                                                                                                                  |  |  |  |  |  |  |
| <b>1</b>                                                  | All support for the present manuscript (e.g., funding, provision of study materials, medical writing, article processing charges, etc.)<br><b>No time limit for this item.</b> | <input checked="" type="checkbox"/> <b>None</b><br><table border="1" style="width: 100%; height: 40px; margin-top: 5px;"> <tr><td style="width: 60%;"></td><td></td></tr> <tr><td></td><td></td></tr> <tr><td></td><td></td></tr> </table> |                                                                                     |  |  |  |  |  | <table border="1" style="width: 100%; height: 40px; margin-top: 5px;"> <tr><td style="width: 60%;"></td><td></td></tr> <tr><td></td><td></td></tr> <tr><td></td><td></td></tr> </table> <p style="font-size: small; color: gray; margin-top: 5px;">Click the tab key to add additional rows.</p> |  |  |  |  |  |  |
|                                                           |                                                                                                                                                                                |                                                                                                                                                                                                                                            |                                                                                     |  |  |  |  |  |                                                                                                                                                                                                                                                                                                  |  |  |  |  |  |  |
|                                                           |                                                                                                                                                                                |                                                                                                                                                                                                                                            |                                                                                     |  |  |  |  |  |                                                                                                                                                                                                                                                                                                  |  |  |  |  |  |  |
|                                                           |                                                                                                                                                                                |                                                                                                                                                                                                                                            |                                                                                     |  |  |  |  |  |                                                                                                                                                                                                                                                                                                  |  |  |  |  |  |  |
|                                                           |                                                                                                                                                                                |                                                                                                                                                                                                                                            |                                                                                     |  |  |  |  |  |                                                                                                                                                                                                                                                                                                  |  |  |  |  |  |  |
|                                                           |                                                                                                                                                                                |                                                                                                                                                                                                                                            |                                                                                     |  |  |  |  |  |                                                                                                                                                                                                                                                                                                  |  |  |  |  |  |  |
|                                                           |                                                                                                                                                                                |                                                                                                                                                                                                                                            |                                                                                     |  |  |  |  |  |                                                                                                                                                                                                                                                                                                  |  |  |  |  |  |  |
| <b>Time frame: past 36 months</b>                         |                                                                                                                                                                                |                                                                                                                                                                                                                                            |                                                                                     |  |  |  |  |  |                                                                                                                                                                                                                                                                                                  |  |  |  |  |  |  |
| <b>2</b>                                                  | Grants or contracts from any entity (if not indicated in item #1 above).                                                                                                       | <input checked="" type="checkbox"/> <b>None</b><br><table border="1" style="width: 100%; height: 40px; margin-top: 5px;"> <tr><td style="width: 60%;"></td><td></td></tr> <tr><td></td><td></td></tr> <tr><td></td><td></td></tr> </table> |                                                                                     |  |  |  |  |  | <table border="1" style="width: 100%; height: 40px; margin-top: 5px;"> <tr><td style="width: 60%;"></td><td></td></tr> <tr><td></td><td></td></tr> <tr><td></td><td></td></tr> </table>                                                                                                          |  |  |  |  |  |  |
|                                                           |                                                                                                                                                                                |                                                                                                                                                                                                                                            |                                                                                     |  |  |  |  |  |                                                                                                                                                                                                                                                                                                  |  |  |  |  |  |  |
|                                                           |                                                                                                                                                                                |                                                                                                                                                                                                                                            |                                                                                     |  |  |  |  |  |                                                                                                                                                                                                                                                                                                  |  |  |  |  |  |  |
|                                                           |                                                                                                                                                                                |                                                                                                                                                                                                                                            |                                                                                     |  |  |  |  |  |                                                                                                                                                                                                                                                                                                  |  |  |  |  |  |  |
|                                                           |                                                                                                                                                                                |                                                                                                                                                                                                                                            |                                                                                     |  |  |  |  |  |                                                                                                                                                                                                                                                                                                  |  |  |  |  |  |  |
|                                                           |                                                                                                                                                                                |                                                                                                                                                                                                                                            |                                                                                     |  |  |  |  |  |                                                                                                                                                                                                                                                                                                  |  |  |  |  |  |  |
|                                                           |                                                                                                                                                                                |                                                                                                                                                                                                                                            |                                                                                     |  |  |  |  |  |                                                                                                                                                                                                                                                                                                  |  |  |  |  |  |  |
| <b>3</b>                                                  | Royalties or licenses                                                                                                                                                          | <input checked="" type="checkbox"/> <b>None</b><br><table border="1" style="width: 100%; height: 40px; margin-top: 5px;"> <tr><td style="width: 60%;"></td><td></td></tr> <tr><td></td><td></td></tr> <tr><td></td><td></td></tr> </table> |                                                                                     |  |  |  |  |  | <table border="1" style="width: 100%; height: 40px; margin-top: 5px;"> <tr><td style="width: 60%;"></td><td></td></tr> <tr><td></td><td></td></tr> <tr><td></td><td></td></tr> </table>                                                                                                          |  |  |  |  |  |  |
|                                                           |                                                                                                                                                                                |                                                                                                                                                                                                                                            |                                                                                     |  |  |  |  |  |                                                                                                                                                                                                                                                                                                  |  |  |  |  |  |  |
|                                                           |                                                                                                                                                                                |                                                                                                                                                                                                                                            |                                                                                     |  |  |  |  |  |                                                                                                                                                                                                                                                                                                  |  |  |  |  |  |  |
|                                                           |                                                                                                                                                                                |                                                                                                                                                                                                                                            |                                                                                     |  |  |  |  |  |                                                                                                                                                                                                                                                                                                  |  |  |  |  |  |  |
|                                                           |                                                                                                                                                                                |                                                                                                                                                                                                                                            |                                                                                     |  |  |  |  |  |                                                                                                                                                                                                                                                                                                  |  |  |  |  |  |  |
|                                                           |                                                                                                                                                                                |                                                                                                                                                                                                                                            |                                                                                     |  |  |  |  |  |                                                                                                                                                                                                                                                                                                  |  |  |  |  |  |  |
|                                                           |                                                                                                                                                                                |                                                                                                                                                                                                                                            |                                                                                     |  |  |  |  |  |                                                                                                                                                                                                                                                                                                  |  |  |  |  |  |  |

|    |                                                                                                              | Name all entities with whom you have this relationship or indicate none (add rows as needed)                                                                                                                                                                                                                                                                           | Specifications/Comments (e.g., if payments were made to you or to your institution) |  |  |  |  |  |  |  |  |
|----|--------------------------------------------------------------------------------------------------------------|------------------------------------------------------------------------------------------------------------------------------------------------------------------------------------------------------------------------------------------------------------------------------------------------------------------------------------------------------------------------|-------------------------------------------------------------------------------------|--|--|--|--|--|--|--|--|
| 4  | Consulting fees                                                                                              | <input checked="" type="checkbox"/> <b>None</b><br><table border="1" style="width: 100%; border-collapse: collapse;"> <tr><td style="width: 50%; height: 15px;"></td><td style="width: 50%;"></td></tr> <tr><td style="height: 15px;"></td><td></td></tr> <tr><td style="height: 15px;"></td><td></td></tr> <tr><td style="height: 15px;"></td><td></td></tr> </table> |                                                                                     |  |  |  |  |  |  |  |  |
|    |                                                                                                              |                                                                                                                                                                                                                                                                                                                                                                        |                                                                                     |  |  |  |  |  |  |  |  |
|    |                                                                                                              |                                                                                                                                                                                                                                                                                                                                                                        |                                                                                     |  |  |  |  |  |  |  |  |
|    |                                                                                                              |                                                                                                                                                                                                                                                                                                                                                                        |                                                                                     |  |  |  |  |  |  |  |  |
|    |                                                                                                              |                                                                                                                                                                                                                                                                                                                                                                        |                                                                                     |  |  |  |  |  |  |  |  |
| 5  | Payment or honoraria for lectures, presentations, speakers bureaus, manuscript writing or educational events | <input checked="" type="checkbox"/> <b>None</b><br><table border="1" style="width: 100%; border-collapse: collapse;"> <tr><td style="width: 50%; height: 15px;"></td><td style="width: 50%;"></td></tr> <tr><td style="height: 15px;"></td><td></td></tr> <tr><td style="height: 15px;"></td><td></td></tr> </table>                                                   |                                                                                     |  |  |  |  |  |  |  |  |
|    |                                                                                                              |                                                                                                                                                                                                                                                                                                                                                                        |                                                                                     |  |  |  |  |  |  |  |  |
|    |                                                                                                              |                                                                                                                                                                                                                                                                                                                                                                        |                                                                                     |  |  |  |  |  |  |  |  |
|    |                                                                                                              |                                                                                                                                                                                                                                                                                                                                                                        |                                                                                     |  |  |  |  |  |  |  |  |
| 6  | Payment for expert testimony                                                                                 | <input checked="" type="checkbox"/> <b>None</b><br><table border="1" style="width: 100%; border-collapse: collapse;"> <tr><td style="width: 50%; height: 15px;"></td><td style="width: 50%;"></td></tr> <tr><td style="height: 15px;"></td><td></td></tr> <tr><td style="height: 15px;"></td><td></td></tr> </table>                                                   |                                                                                     |  |  |  |  |  |  |  |  |
|    |                                                                                                              |                                                                                                                                                                                                                                                                                                                                                                        |                                                                                     |  |  |  |  |  |  |  |  |
|    |                                                                                                              |                                                                                                                                                                                                                                                                                                                                                                        |                                                                                     |  |  |  |  |  |  |  |  |
|    |                                                                                                              |                                                                                                                                                                                                                                                                                                                                                                        |                                                                                     |  |  |  |  |  |  |  |  |
| 7  | Support for attending meetings and/or travel                                                                 | <input checked="" type="checkbox"/> <b>None</b><br><table border="1" style="width: 100%; border-collapse: collapse;"> <tr><td style="width: 50%; height: 15px;"></td><td style="width: 50%;"></td></tr> <tr><td style="height: 15px;"></td><td></td></tr> <tr><td style="height: 15px;"></td><td></td></tr> </table>                                                   |                                                                                     |  |  |  |  |  |  |  |  |
|    |                                                                                                              |                                                                                                                                                                                                                                                                                                                                                                        |                                                                                     |  |  |  |  |  |  |  |  |
|    |                                                                                                              |                                                                                                                                                                                                                                                                                                                                                                        |                                                                                     |  |  |  |  |  |  |  |  |
|    |                                                                                                              |                                                                                                                                                                                                                                                                                                                                                                        |                                                                                     |  |  |  |  |  |  |  |  |
| 8  | Patents planned, issued or pending                                                                           | <input checked="" type="checkbox"/> <b>None</b><br><table border="1" style="width: 100%; border-collapse: collapse;"> <tr><td style="width: 50%; height: 15px;"></td><td style="width: 50%;"></td></tr> <tr><td style="height: 15px;"></td><td></td></tr> <tr><td style="height: 15px;"></td><td></td></tr> </table>                                                   |                                                                                     |  |  |  |  |  |  |  |  |
|    |                                                                                                              |                                                                                                                                                                                                                                                                                                                                                                        |                                                                                     |  |  |  |  |  |  |  |  |
|    |                                                                                                              |                                                                                                                                                                                                                                                                                                                                                                        |                                                                                     |  |  |  |  |  |  |  |  |
|    |                                                                                                              |                                                                                                                                                                                                                                                                                                                                                                        |                                                                                     |  |  |  |  |  |  |  |  |
| 9  | Participation on a Data Safety Monitoring Board or Advisory Board                                            | <input checked="" type="checkbox"/> <b>None</b><br><table border="1" style="width: 100%; border-collapse: collapse;"> <tr><td style="width: 50%; height: 15px;"></td><td style="width: 50%;"></td></tr> <tr><td style="height: 15px;"></td><td></td></tr> <tr><td style="height: 15px;"></td><td></td></tr> </table>                                                   |                                                                                     |  |  |  |  |  |  |  |  |
|    |                                                                                                              |                                                                                                                                                                                                                                                                                                                                                                        |                                                                                     |  |  |  |  |  |  |  |  |
|    |                                                                                                              |                                                                                                                                                                                                                                                                                                                                                                        |                                                                                     |  |  |  |  |  |  |  |  |
|    |                                                                                                              |                                                                                                                                                                                                                                                                                                                                                                        |                                                                                     |  |  |  |  |  |  |  |  |
| 10 | Leadership or fiduciary role in other board, society, committee or advocacy group, paid or unpaid            | <input checked="" type="checkbox"/> <b>None</b><br><table border="1" style="width: 100%; border-collapse: collapse;"> <tr><td style="width: 50%; height: 15px;"></td><td style="width: 50%;"></td></tr> <tr><td style="height: 15px;"></td><td></td></tr> <tr><td style="height: 15px;"></td><td></td></tr> </table>                                                   |                                                                                     |  |  |  |  |  |  |  |  |
|    |                                                                                                              |                                                                                                                                                                                                                                                                                                                                                                        |                                                                                     |  |  |  |  |  |  |  |  |
|    |                                                                                                              |                                                                                                                                                                                                                                                                                                                                                                        |                                                                                     |  |  |  |  |  |  |  |  |
|    |                                                                                                              |                                                                                                                                                                                                                                                                                                                                                                        |                                                                                     |  |  |  |  |  |  |  |  |

|           |                                                                                  | Name all entities with whom you have this relationship or indicate none (add rows as needed)                                                                                                                                                                                                                         | Specifications/Comments (e.g., if payments were made to you or to your institution) |  |  |  |  |  |  |
|-----------|----------------------------------------------------------------------------------|----------------------------------------------------------------------------------------------------------------------------------------------------------------------------------------------------------------------------------------------------------------------------------------------------------------------|-------------------------------------------------------------------------------------|--|--|--|--|--|--|
| <b>11</b> | Stock or stock options                                                           | <input checked="" type="checkbox"/> <b>None</b><br><table border="1" style="width: 100%; border-collapse: collapse;"> <tr><td style="width: 50%; height: 20px;"></td><td style="width: 50%;"></td></tr> <tr><td style="height: 20px;"></td><td></td></tr> <tr><td style="height: 20px;"></td><td></td></tr> </table> |                                                                                     |  |  |  |  |  |  |
|           |                                                                                  |                                                                                                                                                                                                                                                                                                                      |                                                                                     |  |  |  |  |  |  |
|           |                                                                                  |                                                                                                                                                                                                                                                                                                                      |                                                                                     |  |  |  |  |  |  |
|           |                                                                                  |                                                                                                                                                                                                                                                                                                                      |                                                                                     |  |  |  |  |  |  |
| <b>12</b> | Receipt of equipment, materials, drugs, medical writing, gifts or other services | <input checked="" type="checkbox"/> <b>None</b><br><table border="1" style="width: 100%; border-collapse: collapse;"> <tr><td style="width: 50%; height: 20px;"></td><td style="width: 50%;"></td></tr> <tr><td style="height: 20px;"></td><td></td></tr> <tr><td style="height: 20px;"></td><td></td></tr> </table> |                                                                                     |  |  |  |  |  |  |
|           |                                                                                  |                                                                                                                                                                                                                                                                                                                      |                                                                                     |  |  |  |  |  |  |
|           |                                                                                  |                                                                                                                                                                                                                                                                                                                      |                                                                                     |  |  |  |  |  |  |
|           |                                                                                  |                                                                                                                                                                                                                                                                                                                      |                                                                                     |  |  |  |  |  |  |
| <b>13</b> | Other financial or non-financial interests                                       | <input checked="" type="checkbox"/> <b>None</b><br><table border="1" style="width: 100%; border-collapse: collapse;"> <tr><td style="width: 50%; height: 20px;"></td><td style="width: 50%;"></td></tr> <tr><td style="height: 20px;"></td><td></td></tr> <tr><td style="height: 20px;"></td><td></td></tr> </table> |                                                                                     |  |  |  |  |  |  |
|           |                                                                                  |                                                                                                                                                                                                                                                                                                                      |                                                                                     |  |  |  |  |  |  |
|           |                                                                                  |                                                                                                                                                                                                                                                                                                                      |                                                                                     |  |  |  |  |  |  |
|           |                                                                                  |                                                                                                                                                                                                                                                                                                                      |                                                                                     |  |  |  |  |  |  |

**Please place an "X" next to the following statement to indicate your agreement:**

I certify that I have answered every question and have not altered the wording of any of the questions on this form.

## ICMJE DISCLOSURE FORM

**Date:** 8/7/2021

**Your Name:** MORENO Christophe

**Manuscript Title:** Patient and physician expectation's regarding disease and treatment of advanced HCC: the prospective PERCEPTION1 study

**Manuscript Number (if known):** JHEPR-D-24-00819

In the interest of transparency, we ask you to disclose all relationships/activities/interests listed below that are related to the content of your manuscript. "Related" means any relation with for-profit or not-for-profit third parties whose interests may be affected by the content of the manuscript. Disclosure represents a commitment to transparency and does not necessarily indicate a bias. If you are in doubt about whether to list a relationship/activity/interest, it is preferable that you do so.

The author's relationships/activities/interests should be defined broadly. For example, if your manuscript pertains to the epidemiology of hypertension, you should declare all relationships with manufacturers of antihypertensive medication, even if that medication is not mentioned in the manuscript.

In item #1 below, report all support for the work reported in this manuscript without time limit. For all other items, the time frame for disclosure is the past 36 months.

|                                                    | Name all entities with whom you have this relationship or indicate none (add rows as needed)                                                                                   | Specifications/Comments (e.g., if payments were made to you or to your institution)                                                                                                                                                                                                                                                                                                                                |                 |  |  |  |  |                                           |
|----------------------------------------------------|--------------------------------------------------------------------------------------------------------------------------------------------------------------------------------|--------------------------------------------------------------------------------------------------------------------------------------------------------------------------------------------------------------------------------------------------------------------------------------------------------------------------------------------------------------------------------------------------------------------|-----------------|--|--|--|--|-------------------------------------------|
| Time frame: Since the initial planning of the work |                                                                                                                                                                                |                                                                                                                                                                                                                                                                                                                                                                                                                    |                 |  |  |  |  |                                           |
| <b>1</b>                                           | All support for the present manuscript (e.g., funding, provision of study materials, medical writing, article processing charges, etc.)<br><b>No time limit for this item.</b> | <input checked="" type="checkbox"/> <b>None</b><br><table border="1" style="width: 100%; border-collapse: collapse; margin-top: 5px;"> <tr><td style="height: 20px;"> </td><td style="width: 20%;"></td></tr> <tr><td style="height: 20px;"> </td><td></td></tr> <tr><td style="height: 20px;"> </td><td style="text-align: right; font-size: small;">Click the tab key to add additional rows.</td></tr> </table> |                 |  |  |  |  | Click the tab key to add additional rows. |
|                                                    |                                                                                                                                                                                |                                                                                                                                                                                                                                                                                                                                                                                                                    |                 |  |  |  |  |                                           |
|                                                    |                                                                                                                                                                                |                                                                                                                                                                                                                                                                                                                                                                                                                    |                 |  |  |  |  |                                           |
|                                                    | Click the tab key to add additional rows.                                                                                                                                      |                                                                                                                                                                                                                                                                                                                                                                                                                    |                 |  |  |  |  |                                           |
| Time frame: past 36 months                         |                                                                                                                                                                                |                                                                                                                                                                                                                                                                                                                                                                                                                    |                 |  |  |  |  |                                           |
| <b>2</b>                                           | Grants or contracts from any entity (if not indicated in item #1 above).                                                                                                       | <input type="checkbox"/> <b>None</b><br><table border="1" style="width: 100%; border-collapse: collapse; margin-top: 5px;"> <tr><td style="height: 20px;">Gilead Sciences</td><td style="width: 20%;"></td></tr> <tr><td style="height: 20px;"> </td><td></td></tr> <tr><td style="height: 20px;"> </td><td></td></tr> </table>                                                                                    | Gilead Sciences |  |  |  |  |                                           |
| Gilead Sciences                                    |                                                                                                                                                                                |                                                                                                                                                                                                                                                                                                                                                                                                                    |                 |  |  |  |  |                                           |
|                                                    |                                                                                                                                                                                |                                                                                                                                                                                                                                                                                                                                                                                                                    |                 |  |  |  |  |                                           |
|                                                    |                                                                                                                                                                                |                                                                                                                                                                                                                                                                                                                                                                                                                    |                 |  |  |  |  |                                           |
| <b>3</b>                                           | Royalties or licenses                                                                                                                                                          | <input checked="" type="checkbox"/> <b>None</b><br><table border="1" style="width: 100%; border-collapse: collapse; margin-top: 5px;"> <tr><td style="height: 20px;"> </td><td style="width: 20%;"></td></tr> <tr><td style="height: 20px;"> </td><td></td></tr> <tr><td style="height: 20px;"> </td><td></td></tr> </table>                                                                                       |                 |  |  |  |  |                                           |
|                                                    |                                                                                                                                                                                |                                                                                                                                                                                                                                                                                                                                                                                                                    |                 |  |  |  |  |                                           |
|                                                    |                                                                                                                                                                                |                                                                                                                                                                                                                                                                                                                                                                                                                    |                 |  |  |  |  |                                           |
|                                                    |                                                                                                                                                                                |                                                                                                                                                                                                                                                                                                                                                                                                                    |                 |  |  |  |  |                                           |

|    |                                                                                                              | Name all entities with whom you have this relationship or indicate none (add rows as needed) | Specifications/Comments (e.g., if payments were made to you or to your institution) |
|----|--------------------------------------------------------------------------------------------------------------|----------------------------------------------------------------------------------------------|-------------------------------------------------------------------------------------|
| 4  | Consulting fees                                                                                              | <input type="checkbox"/> None                                                                |                                                                                     |
|    |                                                                                                              | Gilead, Bayer, Abbvie, Surrozen, Echosens, Ipsen                                             |                                                                                     |
|    |                                                                                                              |                                                                                              |                                                                                     |
|    |                                                                                                              |                                                                                              |                                                                                     |
| 5  | Payment or honoraria for lectures, presentations, speakers bureaus, manuscript writing or educational events | <input type="checkbox"/> None                                                                |                                                                                     |
|    |                                                                                                              | Gilead, Bayer, Abbvie, Echosens                                                              |                                                                                     |
|    |                                                                                                              |                                                                                              |                                                                                     |
|    |                                                                                                              |                                                                                              |                                                                                     |
| 6  | Payment for expert testimony                                                                                 | <input checked="" type="checkbox"/> None                                                     |                                                                                     |
|    |                                                                                                              |                                                                                              |                                                                                     |
|    |                                                                                                              |                                                                                              |                                                                                     |
|    |                                                                                                              |                                                                                              |                                                                                     |
| 7  | Support for attending meetings and/or travel                                                                 | <input type="checkbox"/> None                                                                |                                                                                     |
|    |                                                                                                              | Abbvie, Gilead                                                                               |                                                                                     |
|    |                                                                                                              |                                                                                              |                                                                                     |
|    |                                                                                                              |                                                                                              |                                                                                     |
| 8  | Patents planned, issued or pending                                                                           | <input checked="" type="checkbox"/> None                                                     |                                                                                     |
|    |                                                                                                              |                                                                                              |                                                                                     |
|    |                                                                                                              |                                                                                              |                                                                                     |
|    |                                                                                                              |                                                                                              |                                                                                     |
| 9  | Participation on a Data Safety Monitoring Board or Advisory Board                                            | <input type="checkbox"/> None                                                                |                                                                                     |
|    |                                                                                                              | GSK                                                                                          |                                                                                     |
|    |                                                                                                              |                                                                                              |                                                                                     |
|    |                                                                                                              |                                                                                              |                                                                                     |
| 10 | Leadership or fiduciary role in other board, society, committee or advocacy group, paid or unpaid            | <input checked="" type="checkbox"/> None                                                     |                                                                                     |
|    |                                                                                                              |                                                                                              |                                                                                     |
|    |                                                                                                              |                                                                                              |                                                                                     |
|    |                                                                                                              |                                                                                              |                                                                                     |



|           |                                                                                  | Name all entities with whom you have this relationship or indicate none (add rows as needed)                                                                                                                                                                                                                         | Specifications/Comments (e.g., if payments were made to you or to your institution) |  |  |  |  |  |  |
|-----------|----------------------------------------------------------------------------------|----------------------------------------------------------------------------------------------------------------------------------------------------------------------------------------------------------------------------------------------------------------------------------------------------------------------|-------------------------------------------------------------------------------------|--|--|--|--|--|--|
| <b>11</b> | Stock or stock options                                                           | <input checked="" type="checkbox"/> <b>None</b><br><table border="1" style="width: 100%; border-collapse: collapse;"> <tr><td style="width: 50%; height: 15px;"></td><td style="width: 50%;"></td></tr> <tr><td style="height: 15px;"></td><td></td></tr> <tr><td style="height: 15px;"></td><td></td></tr> </table> |                                                                                     |  |  |  |  |  |  |
|           |                                                                                  |                                                                                                                                                                                                                                                                                                                      |                                                                                     |  |  |  |  |  |  |
|           |                                                                                  |                                                                                                                                                                                                                                                                                                                      |                                                                                     |  |  |  |  |  |  |
|           |                                                                                  |                                                                                                                                                                                                                                                                                                                      |                                                                                     |  |  |  |  |  |  |
| <b>12</b> | Receipt of equipment, materials, drugs, medical writing, gifts or other services | <input checked="" type="checkbox"/> <b>None</b><br><table border="1" style="width: 100%; border-collapse: collapse;"> <tr><td style="width: 50%; height: 15px;"></td><td style="width: 50%;"></td></tr> <tr><td style="height: 15px;"></td><td></td></tr> <tr><td style="height: 15px;"></td><td></td></tr> </table> |                                                                                     |  |  |  |  |  |  |
|           |                                                                                  |                                                                                                                                                                                                                                                                                                                      |                                                                                     |  |  |  |  |  |  |
|           |                                                                                  |                                                                                                                                                                                                                                                                                                                      |                                                                                     |  |  |  |  |  |  |
|           |                                                                                  |                                                                                                                                                                                                                                                                                                                      |                                                                                     |  |  |  |  |  |  |
| <b>13</b> | Other financial or non-financial interests                                       | <input checked="" type="checkbox"/> <b>None</b><br><table border="1" style="width: 100%; border-collapse: collapse;"> <tr><td style="width: 50%; height: 15px;"></td><td style="width: 50%;"></td></tr> <tr><td style="height: 15px;"></td><td></td></tr> <tr><td style="height: 15px;"></td><td></td></tr> </table> |                                                                                     |  |  |  |  |  |  |
|           |                                                                                  |                                                                                                                                                                                                                                                                                                                      |                                                                                     |  |  |  |  |  |  |
|           |                                                                                  |                                                                                                                                                                                                                                                                                                                      |                                                                                     |  |  |  |  |  |  |
|           |                                                                                  |                                                                                                                                                                                                                                                                                                                      |                                                                                     |  |  |  |  |  |  |

**Please place an "X" next to the following statement to indicate your agreement:**

I certify that I have answered every question and have not altered the wording of any of the questions on this form.

## ICMJE DISCLOSURE FORM

**Date:** 8/7/2021

**Your Name:** Edouard Larrey

**Manuscript Title:** Patient and physician expectation's regarding disease and treatment of advanced HCC: the prospective PERCEPTION1 study

**Manuscript Number (if known):** JHEPR-D-24-00819

In the interest of transparency, we ask you to disclose all relationships/activities/interests listed below that are related to the content of your manuscript. "Related" means any relation with for-profit or not-for-profit third parties whose interests may be affected by the content of the manuscript. Disclosure represents a commitment to transparency and does not necessarily indicate a bias. If you are in doubt about whether to list a relationship/activity/interest, it is preferable that you do so.

The author's relationships/activities/interests should be defined broadly. For example, if your manuscript pertains to the epidemiology of hypertension, you should declare all relationships with manufacturers of antihypertensive medication, even if that medication is not mentioned in the manuscript.

In item #1 below, report all support for the work reported in this manuscript without time limit. For all other items, the time frame for disclosure is the past 36 months.

|                                                    | Name all entities with whom you have this relationship or indicate none (add rows as needed)                                                                                   | Specifications/Comments (e.g., if payments were made to you or to your institution)                                                                                                                                                                                                  |  |  |  |  |  |  |
|----------------------------------------------------|--------------------------------------------------------------------------------------------------------------------------------------------------------------------------------|--------------------------------------------------------------------------------------------------------------------------------------------------------------------------------------------------------------------------------------------------------------------------------------|--|--|--|--|--|--|
| Time frame: Since the initial planning of the work |                                                                                                                                                                                |                                                                                                                                                                                                                                                                                      |  |  |  |  |  |  |
| <b>1</b>                                           | All support for the present manuscript (e.g., funding, provision of study materials, medical writing, article processing charges, etc.)<br><b>No time limit for this item.</b> | <input checked="" type="checkbox"/> <b>None</b><br><table border="1" style="width: 100%; height: 40px; margin-top: 5px;"> <tr><td style="width: 60%;"></td><td></td></tr> <tr><td></td><td></td></tr> <tr><td></td><td></td></tr> </table> Click the tab key to add additional rows. |  |  |  |  |  |  |
|                                                    |                                                                                                                                                                                |                                                                                                                                                                                                                                                                                      |  |  |  |  |  |  |
|                                                    |                                                                                                                                                                                |                                                                                                                                                                                                                                                                                      |  |  |  |  |  |  |
|                                                    |                                                                                                                                                                                |                                                                                                                                                                                                                                                                                      |  |  |  |  |  |  |
| Time frame: past 36 months                         |                                                                                                                                                                                |                                                                                                                                                                                                                                                                                      |  |  |  |  |  |  |
| <b>2</b>                                           | Grants or contracts from any entity (if not indicated in item #1 above).                                                                                                       | <input checked="" type="checkbox"/> <b>None</b><br><table border="1" style="width: 100%; height: 40px; margin-top: 5px;"> <tr><td style="width: 60%;"></td><td></td></tr> <tr><td></td><td></td></tr> <tr><td></td><td></td></tr> </table>                                           |  |  |  |  |  |  |
|                                                    |                                                                                                                                                                                |                                                                                                                                                                                                                                                                                      |  |  |  |  |  |  |
|                                                    |                                                                                                                                                                                |                                                                                                                                                                                                                                                                                      |  |  |  |  |  |  |
|                                                    |                                                                                                                                                                                |                                                                                                                                                                                                                                                                                      |  |  |  |  |  |  |
| <b>3</b>                                           | Royalties or licenses                                                                                                                                                          | <input checked="" type="checkbox"/> <b>None</b><br><table border="1" style="width: 100%; height: 40px; margin-top: 5px;"> <tr><td style="width: 60%;"></td><td></td></tr> <tr><td></td><td></td></tr> <tr><td></td><td></td></tr> </table>                                           |  |  |  |  |  |  |
|                                                    |                                                                                                                                                                                |                                                                                                                                                                                                                                                                                      |  |  |  |  |  |  |
|                                                    |                                                                                                                                                                                |                                                                                                                                                                                                                                                                                      |  |  |  |  |  |  |
|                                                    |                                                                                                                                                                                |                                                                                                                                                                                                                                                                                      |  |  |  |  |  |  |

|    |                                                                                                              | Name all entities with whom you have this relationship or indicate none (add rows as needed)                                                                                                                                                                                                                                                                           | Specifications/Comments (e.g., if payments were made to you or to your institution) |  |  |  |  |  |  |  |  |
|----|--------------------------------------------------------------------------------------------------------------|------------------------------------------------------------------------------------------------------------------------------------------------------------------------------------------------------------------------------------------------------------------------------------------------------------------------------------------------------------------------|-------------------------------------------------------------------------------------|--|--|--|--|--|--|--|--|
| 4  | Consulting fees                                                                                              | <input checked="" type="checkbox"/> <b>None</b><br><table border="1" style="width: 100%; border-collapse: collapse;"> <tr><td style="width: 50%; height: 15px;"></td><td style="width: 50%;"></td></tr> <tr><td style="height: 15px;"></td><td></td></tr> <tr><td style="height: 15px;"></td><td></td></tr> <tr><td style="height: 15px;"></td><td></td></tr> </table> |                                                                                     |  |  |  |  |  |  |  |  |
|    |                                                                                                              |                                                                                                                                                                                                                                                                                                                                                                        |                                                                                     |  |  |  |  |  |  |  |  |
|    |                                                                                                              |                                                                                                                                                                                                                                                                                                                                                                        |                                                                                     |  |  |  |  |  |  |  |  |
|    |                                                                                                              |                                                                                                                                                                                                                                                                                                                                                                        |                                                                                     |  |  |  |  |  |  |  |  |
|    |                                                                                                              |                                                                                                                                                                                                                                                                                                                                                                        |                                                                                     |  |  |  |  |  |  |  |  |
| 5  | Payment or honoraria for lectures, presentations, speakers bureaus, manuscript writing or educational events | <input checked="" type="checkbox"/> <b>None</b><br><table border="1" style="width: 100%; border-collapse: collapse;"> <tr><td style="width: 50%; height: 15px;"></td><td style="width: 50%;"></td></tr> <tr><td style="height: 15px;"></td><td></td></tr> <tr><td style="height: 15px;"></td><td></td></tr> </table>                                                   |                                                                                     |  |  |  |  |  |  |  |  |
|    |                                                                                                              |                                                                                                                                                                                                                                                                                                                                                                        |                                                                                     |  |  |  |  |  |  |  |  |
|    |                                                                                                              |                                                                                                                                                                                                                                                                                                                                                                        |                                                                                     |  |  |  |  |  |  |  |  |
|    |                                                                                                              |                                                                                                                                                                                                                                                                                                                                                                        |                                                                                     |  |  |  |  |  |  |  |  |
| 6  | Payment for expert testimony                                                                                 | <input checked="" type="checkbox"/> <b>None</b><br><table border="1" style="width: 100%; border-collapse: collapse;"> <tr><td style="width: 50%; height: 15px;"></td><td style="width: 50%;"></td></tr> <tr><td style="height: 15px;"></td><td></td></tr> <tr><td style="height: 15px;"></td><td></td></tr> </table>                                                   |                                                                                     |  |  |  |  |  |  |  |  |
|    |                                                                                                              |                                                                                                                                                                                                                                                                                                                                                                        |                                                                                     |  |  |  |  |  |  |  |  |
|    |                                                                                                              |                                                                                                                                                                                                                                                                                                                                                                        |                                                                                     |  |  |  |  |  |  |  |  |
|    |                                                                                                              |                                                                                                                                                                                                                                                                                                                                                                        |                                                                                     |  |  |  |  |  |  |  |  |
| 7  | Support for attending meetings and/or travel                                                                 | <input checked="" type="checkbox"/> <b>None</b><br><table border="1" style="width: 100%; border-collapse: collapse;"> <tr><td style="width: 50%; height: 15px;"></td><td style="width: 50%;"></td></tr> <tr><td style="height: 15px;"></td><td></td></tr> <tr><td style="height: 15px;"></td><td></td></tr> </table>                                                   |                                                                                     |  |  |  |  |  |  |  |  |
|    |                                                                                                              |                                                                                                                                                                                                                                                                                                                                                                        |                                                                                     |  |  |  |  |  |  |  |  |
|    |                                                                                                              |                                                                                                                                                                                                                                                                                                                                                                        |                                                                                     |  |  |  |  |  |  |  |  |
|    |                                                                                                              |                                                                                                                                                                                                                                                                                                                                                                        |                                                                                     |  |  |  |  |  |  |  |  |
| 8  | Patents planned, issued or pending                                                                           | <input checked="" type="checkbox"/> <b>None</b><br><table border="1" style="width: 100%; border-collapse: collapse;"> <tr><td style="width: 50%; height: 15px;"></td><td style="width: 50%;"></td></tr> <tr><td style="height: 15px;"></td><td></td></tr> <tr><td style="height: 15px;"></td><td></td></tr> </table>                                                   |                                                                                     |  |  |  |  |  |  |  |  |
|    |                                                                                                              |                                                                                                                                                                                                                                                                                                                                                                        |                                                                                     |  |  |  |  |  |  |  |  |
|    |                                                                                                              |                                                                                                                                                                                                                                                                                                                                                                        |                                                                                     |  |  |  |  |  |  |  |  |
|    |                                                                                                              |                                                                                                                                                                                                                                                                                                                                                                        |                                                                                     |  |  |  |  |  |  |  |  |
| 9  | Participation on a Data Safety Monitoring Board or Advisory Board                                            | <input checked="" type="checkbox"/> <b>None</b><br><table border="1" style="width: 100%; border-collapse: collapse;"> <tr><td style="width: 50%; height: 15px;"></td><td style="width: 50%;"></td></tr> <tr><td style="height: 15px;"></td><td></td></tr> <tr><td style="height: 15px;"></td><td></td></tr> </table>                                                   |                                                                                     |  |  |  |  |  |  |  |  |
|    |                                                                                                              |                                                                                                                                                                                                                                                                                                                                                                        |                                                                                     |  |  |  |  |  |  |  |  |
|    |                                                                                                              |                                                                                                                                                                                                                                                                                                                                                                        |                                                                                     |  |  |  |  |  |  |  |  |
|    |                                                                                                              |                                                                                                                                                                                                                                                                                                                                                                        |                                                                                     |  |  |  |  |  |  |  |  |
| 10 | Leadership or fiduciary role in other board, society, committee or advocacy group, paid or unpaid            | <input checked="" type="checkbox"/> <b>None</b><br><table border="1" style="width: 100%; border-collapse: collapse;"> <tr><td style="width: 50%; height: 15px;"></td><td style="width: 50%;"></td></tr> <tr><td style="height: 15px;"></td><td></td></tr> <tr><td style="height: 15px;"></td><td></td></tr> </table>                                                   |                                                                                     |  |  |  |  |  |  |  |  |
|    |                                                                                                              |                                                                                                                                                                                                                                                                                                                                                                        |                                                                                     |  |  |  |  |  |  |  |  |
|    |                                                                                                              |                                                                                                                                                                                                                                                                                                                                                                        |                                                                                     |  |  |  |  |  |  |  |  |
|    |                                                                                                              |                                                                                                                                                                                                                                                                                                                                                                        |                                                                                     |  |  |  |  |  |  |  |  |

|           |                                                                                  | Name all entities with whom you have this relationship or indicate none (add rows as needed)                                                                                                                                                                                                                         | Specifications/Comments (e.g., if payments were made to you or to your institution) |  |  |  |  |  |  |
|-----------|----------------------------------------------------------------------------------|----------------------------------------------------------------------------------------------------------------------------------------------------------------------------------------------------------------------------------------------------------------------------------------------------------------------|-------------------------------------------------------------------------------------|--|--|--|--|--|--|
| <b>11</b> | Stock or stock options                                                           | <input checked="" type="checkbox"/> <b>None</b><br><table border="1" style="width: 100%; border-collapse: collapse;"> <tr><td style="width: 50%; height: 15px;"></td><td style="width: 50%;"></td></tr> <tr><td style="height: 15px;"></td><td></td></tr> <tr><td style="height: 15px;"></td><td></td></tr> </table> |                                                                                     |  |  |  |  |  |  |
|           |                                                                                  |                                                                                                                                                                                                                                                                                                                      |                                                                                     |  |  |  |  |  |  |
|           |                                                                                  |                                                                                                                                                                                                                                                                                                                      |                                                                                     |  |  |  |  |  |  |
|           |                                                                                  |                                                                                                                                                                                                                                                                                                                      |                                                                                     |  |  |  |  |  |  |
| <b>12</b> | Receipt of equipment, materials, drugs, medical writing, gifts or other services | <input checked="" type="checkbox"/> <b>None</b><br><table border="1" style="width: 100%; border-collapse: collapse;"> <tr><td style="width: 50%; height: 15px;"></td><td style="width: 50%;"></td></tr> <tr><td style="height: 15px;"></td><td></td></tr> <tr><td style="height: 15px;"></td><td></td></tr> </table> |                                                                                     |  |  |  |  |  |  |
|           |                                                                                  |                                                                                                                                                                                                                                                                                                                      |                                                                                     |  |  |  |  |  |  |
|           |                                                                                  |                                                                                                                                                                                                                                                                                                                      |                                                                                     |  |  |  |  |  |  |
|           |                                                                                  |                                                                                                                                                                                                                                                                                                                      |                                                                                     |  |  |  |  |  |  |
| <b>13</b> | Other financial or non-financial interests                                       | <input checked="" type="checkbox"/> <b>None</b><br><table border="1" style="width: 100%; border-collapse: collapse;"> <tr><td style="width: 50%; height: 15px;"></td><td style="width: 50%;"></td></tr> <tr><td style="height: 15px;"></td><td></td></tr> <tr><td style="height: 15px;"></td><td></td></tr> </table> |                                                                                     |  |  |  |  |  |  |
|           |                                                                                  |                                                                                                                                                                                                                                                                                                                      |                                                                                     |  |  |  |  |  |  |
|           |                                                                                  |                                                                                                                                                                                                                                                                                                                      |                                                                                     |  |  |  |  |  |  |
|           |                                                                                  |                                                                                                                                                                                                                                                                                                                      |                                                                                     |  |  |  |  |  |  |

**Please place an "X" next to the following statement to indicate your agreement:**

I certify that I have answered every question and have not altered the wording of any of the questions on this form.

## ICMJE DISCLOSURE FORM

**Date:** 8/7/2021

**Your Name:** Sabrina Sidali

**Manuscript Title:** Patient and physician expectation's regarding disease and treatment of advanced HCC: the prospective PERCEPTION1 study

**Manuscript Number (if known):** JHEPR-D-24-00819

In the interest of transparency, we ask you to disclose all relationships/activities/interests listed below that are related to the content of your manuscript. "Related" means any relation with for-profit or not-for-profit third parties whose interests may be affected by the content of the manuscript. Disclosure represents a commitment to transparency and does not necessarily indicate a bias. If you are in doubt about whether to list a relationship/activity/interest, it is preferable that you do so.

The author's relationships/activities/interests should be defined broadly. For example, if your manuscript pertains to the epidemiology of hypertension, you should declare all relationships with manufacturers of antihypertensive medication, even if that medication is not mentioned in the manuscript.

In item #1 below, report all support for the work reported in this manuscript without time limit. For all other items, the time frame for disclosure is the past 36 months.

|                                                    | Name all entities with whom you have this relationship or indicate none (add rows as needed)                                                                                   | Specifications/Comments (e.g., if payments were made to you or to your institution)                                                                                                                                                                                                                                                                                           |  |  |  |  |  |  |
|----------------------------------------------------|--------------------------------------------------------------------------------------------------------------------------------------------------------------------------------|-------------------------------------------------------------------------------------------------------------------------------------------------------------------------------------------------------------------------------------------------------------------------------------------------------------------------------------------------------------------------------|--|--|--|--|--|--|
| Time frame: Since the initial planning of the work |                                                                                                                                                                                |                                                                                                                                                                                                                                                                                                                                                                               |  |  |  |  |  |  |
| <b>1</b>                                           | All support for the present manuscript (e.g., funding, provision of study materials, medical writing, article processing charges, etc.)<br><b>No time limit for this item.</b> | <input checked="" type="checkbox"/> <b>None</b><br><table border="1" style="width: 100%; height: 40px; margin-top: 5px;"> <tr><td style="width: 60%;"></td><td style="width: 40%;"></td></tr> <tr><td></td><td></td></tr> <tr><td></td><td></td></tr> </table> <p style="font-size: small; text-align: right; margin-top: 5px;">Click the tab key to add additional rows.</p> |  |  |  |  |  |  |
|                                                    |                                                                                                                                                                                |                                                                                                                                                                                                                                                                                                                                                                               |  |  |  |  |  |  |
|                                                    |                                                                                                                                                                                |                                                                                                                                                                                                                                                                                                                                                                               |  |  |  |  |  |  |
|                                                    |                                                                                                                                                                                |                                                                                                                                                                                                                                                                                                                                                                               |  |  |  |  |  |  |
| Time frame: past 36 months                         |                                                                                                                                                                                |                                                                                                                                                                                                                                                                                                                                                                               |  |  |  |  |  |  |
| <b>2</b>                                           | Grants or contracts from any entity (if not indicated in item #1 above).                                                                                                       | <input checked="" type="checkbox"/> <b>None</b><br><table border="1" style="width: 100%; height: 40px; margin-top: 5px;"> <tr><td style="width: 60%;"></td><td style="width: 40%;"></td></tr> <tr><td></td><td></td></tr> <tr><td></td><td></td></tr> </table>                                                                                                                |  |  |  |  |  |  |
|                                                    |                                                                                                                                                                                |                                                                                                                                                                                                                                                                                                                                                                               |  |  |  |  |  |  |
|                                                    |                                                                                                                                                                                |                                                                                                                                                                                                                                                                                                                                                                               |  |  |  |  |  |  |
|                                                    |                                                                                                                                                                                |                                                                                                                                                                                                                                                                                                                                                                               |  |  |  |  |  |  |
| <b>3</b>                                           | Royalties or licenses                                                                                                                                                          | <input checked="" type="checkbox"/> <b>None</b><br><table border="1" style="width: 100%; height: 40px; margin-top: 5px;"> <tr><td style="width: 60%;"></td><td style="width: 40%;"></td></tr> <tr><td></td><td></td></tr> <tr><td></td><td></td></tr> </table>                                                                                                                |  |  |  |  |  |  |
|                                                    |                                                                                                                                                                                |                                                                                                                                                                                                                                                                                                                                                                               |  |  |  |  |  |  |
|                                                    |                                                                                                                                                                                |                                                                                                                                                                                                                                                                                                                                                                               |  |  |  |  |  |  |
|                                                    |                                                                                                                                                                                |                                                                                                                                                                                                                                                                                                                                                                               |  |  |  |  |  |  |

|    |                                                                                                              | Name all entities with whom you have this relationship or indicate none (add rows as needed)                                                                                                                                                                                                                                                                           | Specifications/Comments (e.g., if payments were made to you or to your institution) |  |  |  |  |  |  |  |  |
|----|--------------------------------------------------------------------------------------------------------------|------------------------------------------------------------------------------------------------------------------------------------------------------------------------------------------------------------------------------------------------------------------------------------------------------------------------------------------------------------------------|-------------------------------------------------------------------------------------|--|--|--|--|--|--|--|--|
| 4  | Consulting fees                                                                                              | <input checked="" type="checkbox"/> <b>None</b><br><table border="1" style="width: 100%; border-collapse: collapse;"> <tr><td style="width: 50%; height: 15px;"></td><td style="width: 50%;"></td></tr> <tr><td style="height: 15px;"></td><td></td></tr> <tr><td style="height: 15px;"></td><td></td></tr> <tr><td style="height: 15px;"></td><td></td></tr> </table> |                                                                                     |  |  |  |  |  |  |  |  |
|    |                                                                                                              |                                                                                                                                                                                                                                                                                                                                                                        |                                                                                     |  |  |  |  |  |  |  |  |
|    |                                                                                                              |                                                                                                                                                                                                                                                                                                                                                                        |                                                                                     |  |  |  |  |  |  |  |  |
|    |                                                                                                              |                                                                                                                                                                                                                                                                                                                                                                        |                                                                                     |  |  |  |  |  |  |  |  |
|    |                                                                                                              |                                                                                                                                                                                                                                                                                                                                                                        |                                                                                     |  |  |  |  |  |  |  |  |
| 5  | Payment or honoraria for lectures, presentations, speakers bureaus, manuscript writing or educational events | <input checked="" type="checkbox"/> <b>None</b><br><table border="1" style="width: 100%; border-collapse: collapse;"> <tr><td style="width: 50%; height: 15px;"></td><td style="width: 50%;"></td></tr> <tr><td style="height: 15px;"></td><td></td></tr> <tr><td style="height: 15px;"></td><td></td></tr> </table>                                                   |                                                                                     |  |  |  |  |  |  |  |  |
|    |                                                                                                              |                                                                                                                                                                                                                                                                                                                                                                        |                                                                                     |  |  |  |  |  |  |  |  |
|    |                                                                                                              |                                                                                                                                                                                                                                                                                                                                                                        |                                                                                     |  |  |  |  |  |  |  |  |
|    |                                                                                                              |                                                                                                                                                                                                                                                                                                                                                                        |                                                                                     |  |  |  |  |  |  |  |  |
| 6  | Payment for expert testimony                                                                                 | <input checked="" type="checkbox"/> <b>None</b><br><table border="1" style="width: 100%; border-collapse: collapse;"> <tr><td style="width: 50%; height: 15px;"></td><td style="width: 50%;"></td></tr> <tr><td style="height: 15px;"></td><td></td></tr> <tr><td style="height: 15px;"></td><td></td></tr> </table>                                                   |                                                                                     |  |  |  |  |  |  |  |  |
|    |                                                                                                              |                                                                                                                                                                                                                                                                                                                                                                        |                                                                                     |  |  |  |  |  |  |  |  |
|    |                                                                                                              |                                                                                                                                                                                                                                                                                                                                                                        |                                                                                     |  |  |  |  |  |  |  |  |
|    |                                                                                                              |                                                                                                                                                                                                                                                                                                                                                                        |                                                                                     |  |  |  |  |  |  |  |  |
| 7  | Support for attending meetings and/or travel                                                                 | <input checked="" type="checkbox"/> <b>None</b><br><table border="1" style="width: 100%; border-collapse: collapse;"> <tr><td style="width: 50%; height: 15px;"></td><td style="width: 50%;"></td></tr> <tr><td style="height: 15px;"></td><td></td></tr> <tr><td style="height: 15px;"></td><td></td></tr> </table>                                                   |                                                                                     |  |  |  |  |  |  |  |  |
|    |                                                                                                              |                                                                                                                                                                                                                                                                                                                                                                        |                                                                                     |  |  |  |  |  |  |  |  |
|    |                                                                                                              |                                                                                                                                                                                                                                                                                                                                                                        |                                                                                     |  |  |  |  |  |  |  |  |
|    |                                                                                                              |                                                                                                                                                                                                                                                                                                                                                                        |                                                                                     |  |  |  |  |  |  |  |  |
| 8  | Patents planned, issued or pending                                                                           | <input checked="" type="checkbox"/> <b>None</b><br><table border="1" style="width: 100%; border-collapse: collapse;"> <tr><td style="width: 50%; height: 15px;"></td><td style="width: 50%;"></td></tr> <tr><td style="height: 15px;"></td><td></td></tr> <tr><td style="height: 15px;"></td><td></td></tr> </table>                                                   |                                                                                     |  |  |  |  |  |  |  |  |
|    |                                                                                                              |                                                                                                                                                                                                                                                                                                                                                                        |                                                                                     |  |  |  |  |  |  |  |  |
|    |                                                                                                              |                                                                                                                                                                                                                                                                                                                                                                        |                                                                                     |  |  |  |  |  |  |  |  |
|    |                                                                                                              |                                                                                                                                                                                                                                                                                                                                                                        |                                                                                     |  |  |  |  |  |  |  |  |
| 9  | Participation on a Data Safety Monitoring Board or Advisory Board                                            | <input checked="" type="checkbox"/> <b>None</b><br><table border="1" style="width: 100%; border-collapse: collapse;"> <tr><td style="width: 50%; height: 15px;"></td><td style="width: 50%;"></td></tr> <tr><td style="height: 15px;"></td><td></td></tr> <tr><td style="height: 15px;"></td><td></td></tr> </table>                                                   |                                                                                     |  |  |  |  |  |  |  |  |
|    |                                                                                                              |                                                                                                                                                                                                                                                                                                                                                                        |                                                                                     |  |  |  |  |  |  |  |  |
|    |                                                                                                              |                                                                                                                                                                                                                                                                                                                                                                        |                                                                                     |  |  |  |  |  |  |  |  |
|    |                                                                                                              |                                                                                                                                                                                                                                                                                                                                                                        |                                                                                     |  |  |  |  |  |  |  |  |
| 10 | Leadership or fiduciary role in other board, society, committee or advocacy group, paid or unpaid            | <input checked="" type="checkbox"/> <b>None</b><br><table border="1" style="width: 100%; border-collapse: collapse;"> <tr><td style="width: 50%; height: 15px;"></td><td style="width: 50%;"></td></tr> <tr><td style="height: 15px;"></td><td></td></tr> <tr><td style="height: 15px;"></td><td></td></tr> </table>                                                   |                                                                                     |  |  |  |  |  |  |  |  |
|    |                                                                                                              |                                                                                                                                                                                                                                                                                                                                                                        |                                                                                     |  |  |  |  |  |  |  |  |
|    |                                                                                                              |                                                                                                                                                                                                                                                                                                                                                                        |                                                                                     |  |  |  |  |  |  |  |  |
|    |                                                                                                              |                                                                                                                                                                                                                                                                                                                                                                        |                                                                                     |  |  |  |  |  |  |  |  |

|           |                                                                                  | Name all entities with whom you have this relationship or indicate none (add rows as needed)                                                                                                                                                                                                                         | Specifications/Comments (e.g., if payments were made to you or to your institution) |  |  |  |  |  |  |
|-----------|----------------------------------------------------------------------------------|----------------------------------------------------------------------------------------------------------------------------------------------------------------------------------------------------------------------------------------------------------------------------------------------------------------------|-------------------------------------------------------------------------------------|--|--|--|--|--|--|
| <b>11</b> | Stock or stock options                                                           | <input checked="" type="checkbox"/> <b>None</b><br><table border="1" style="width: 100%; border-collapse: collapse;"> <tr><td style="width: 50%; height: 15px;"></td><td style="width: 50%;"></td></tr> <tr><td style="height: 15px;"></td><td></td></tr> <tr><td style="height: 15px;"></td><td></td></tr> </table> |                                                                                     |  |  |  |  |  |  |
|           |                                                                                  |                                                                                                                                                                                                                                                                                                                      |                                                                                     |  |  |  |  |  |  |
|           |                                                                                  |                                                                                                                                                                                                                                                                                                                      |                                                                                     |  |  |  |  |  |  |
|           |                                                                                  |                                                                                                                                                                                                                                                                                                                      |                                                                                     |  |  |  |  |  |  |
| <b>12</b> | Receipt of equipment, materials, drugs, medical writing, gifts or other services | <input checked="" type="checkbox"/> <b>None</b><br><table border="1" style="width: 100%; border-collapse: collapse;"> <tr><td style="width: 50%; height: 15px;"></td><td style="width: 50%;"></td></tr> <tr><td style="height: 15px;"></td><td></td></tr> <tr><td style="height: 15px;"></td><td></td></tr> </table> |                                                                                     |  |  |  |  |  |  |
|           |                                                                                  |                                                                                                                                                                                                                                                                                                                      |                                                                                     |  |  |  |  |  |  |
|           |                                                                                  |                                                                                                                                                                                                                                                                                                                      |                                                                                     |  |  |  |  |  |  |
|           |                                                                                  |                                                                                                                                                                                                                                                                                                                      |                                                                                     |  |  |  |  |  |  |
| <b>13</b> | Other financial or non-financial interests                                       | <input checked="" type="checkbox"/> <b>None</b><br><table border="1" style="width: 100%; border-collapse: collapse;"> <tr><td style="width: 50%; height: 15px;"></td><td style="width: 50%;"></td></tr> <tr><td style="height: 15px;"></td><td></td></tr> <tr><td style="height: 15px;"></td><td></td></tr> </table> |                                                                                     |  |  |  |  |  |  |
|           |                                                                                  |                                                                                                                                                                                                                                                                                                                      |                                                                                     |  |  |  |  |  |  |
|           |                                                                                  |                                                                                                                                                                                                                                                                                                                      |                                                                                     |  |  |  |  |  |  |
|           |                                                                                  |                                                                                                                                                                                                                                                                                                                      |                                                                                     |  |  |  |  |  |  |

**Please place an "X" next to the following statement to indicate your agreement:**

I certify that I have answered every question and have not altered the wording of any of the questions on this form.

## ICMJE DISCLOSURE FORM

**Date:** 8/7/2021

**Your Name:** HOLLANDE Clémence

**Manuscript Title:** Patient and physician expectation's regarding disease and treatment of advanced HCC: the prospective PERCEPTION1 study

**Manuscript Number (if known):** JHEPR-D-24-00819

In the interest of transparency, we ask you to disclose all relationships/activities/interests listed below that are related to the content of your manuscript. "Related" means any relation with for-profit or not-for-profit third parties whose interests may be affected by the content of the manuscript. Disclosure represents a commitment to transparency and does not necessarily indicate a bias. If you are in doubt about whether to list a relationship/activity/interest, it is preferable that you do so.

The author's relationships/activities/interests should be defined broadly. For example, if your manuscript pertains to the epidemiology of hypertension, you should declare all relationships with manufacturers of antihypertensive medication, even if that medication is not mentioned in the manuscript.

In item #1 below, report all support for the work reported in this manuscript without time limit. For all other items, the time frame for disclosure is the past 36 months.

|                                                           | Name all entities with whom you have this relationship or indicate none (add rows as needed)                                                                                   | Specifications/Comments (e.g., if payments were made to you or to your institution)                                                                                                                                                                                                                                                                                     |  |  |  |  |  |  |
|-----------------------------------------------------------|--------------------------------------------------------------------------------------------------------------------------------------------------------------------------------|-------------------------------------------------------------------------------------------------------------------------------------------------------------------------------------------------------------------------------------------------------------------------------------------------------------------------------------------------------------------------|--|--|--|--|--|--|
| <b>Time frame: Since the initial planning of the work</b> |                                                                                                                                                                                |                                                                                                                                                                                                                                                                                                                                                                         |  |  |  |  |  |  |
| <b>1</b>                                                  | All support for the present manuscript (e.g., funding, provision of study materials, medical writing, article processing charges, etc.)<br><b>No time limit for this item.</b> | <input checked="" type="checkbox"/> <b>None</b><br><table border="1" style="width: 100%; height: 40px; margin-top: 5px;"> <tr><td style="width: 60%;"></td><td style="width: 40%;"></td></tr> <tr><td></td><td></td></tr> <tr><td></td><td></td></tr> </table> <p style="font-size: small; color: gray; margin-top: 5px;">Click the tab key to add additional rows.</p> |  |  |  |  |  |  |
|                                                           |                                                                                                                                                                                |                                                                                                                                                                                                                                                                                                                                                                         |  |  |  |  |  |  |
|                                                           |                                                                                                                                                                                |                                                                                                                                                                                                                                                                                                                                                                         |  |  |  |  |  |  |
|                                                           |                                                                                                                                                                                |                                                                                                                                                                                                                                                                                                                                                                         |  |  |  |  |  |  |
| <b>Time frame: past 36 months</b>                         |                                                                                                                                                                                |                                                                                                                                                                                                                                                                                                                                                                         |  |  |  |  |  |  |
| <b>2</b>                                                  | Grants or contracts from any entity (if not indicated in item #1 above).                                                                                                       | <input checked="" type="checkbox"/> <b>None</b><br><table border="1" style="width: 100%; height: 40px; margin-top: 5px;"> <tr><td style="width: 60%;"></td><td style="width: 40%;"></td></tr> <tr><td></td><td></td></tr> <tr><td></td><td></td></tr> </table>                                                                                                          |  |  |  |  |  |  |
|                                                           |                                                                                                                                                                                |                                                                                                                                                                                                                                                                                                                                                                         |  |  |  |  |  |  |
|                                                           |                                                                                                                                                                                |                                                                                                                                                                                                                                                                                                                                                                         |  |  |  |  |  |  |
|                                                           |                                                                                                                                                                                |                                                                                                                                                                                                                                                                                                                                                                         |  |  |  |  |  |  |
| <b>3</b>                                                  | Royalties or licenses                                                                                                                                                          | <input checked="" type="checkbox"/> <b>None</b><br><table border="1" style="width: 100%; height: 40px; margin-top: 5px;"> <tr><td style="width: 60%;"></td><td style="width: 40%;"></td></tr> <tr><td></td><td></td></tr> <tr><td></td><td></td></tr> </table>                                                                                                          |  |  |  |  |  |  |
|                                                           |                                                                                                                                                                                |                                                                                                                                                                                                                                                                                                                                                                         |  |  |  |  |  |  |
|                                                           |                                                                                                                                                                                |                                                                                                                                                                                                                                                                                                                                                                         |  |  |  |  |  |  |
|                                                           |                                                                                                                                                                                |                                                                                                                                                                                                                                                                                                                                                                         |  |  |  |  |  |  |



|    |                                                                                                              | Name all entities with whom you have this relationship or indicate none (add rows as needed)                                                                                                                                                                                                                                                                           | Specifications/Comments (e.g., if payments were made to you or to your institution) |  |  |  |  |  |  |  |  |
|----|--------------------------------------------------------------------------------------------------------------|------------------------------------------------------------------------------------------------------------------------------------------------------------------------------------------------------------------------------------------------------------------------------------------------------------------------------------------------------------------------|-------------------------------------------------------------------------------------|--|--|--|--|--|--|--|--|
| 4  | Consulting fees                                                                                              | <input checked="" type="checkbox"/> <b>None</b><br><table border="1" style="width: 100%; border-collapse: collapse;"> <tr><td style="width: 50%; height: 15px;"></td><td style="width: 50%;"></td></tr> <tr><td style="height: 15px;"></td><td></td></tr> <tr><td style="height: 15px;"></td><td></td></tr> <tr><td style="height: 15px;"></td><td></td></tr> </table> |                                                                                     |  |  |  |  |  |  |  |  |
|    |                                                                                                              |                                                                                                                                                                                                                                                                                                                                                                        |                                                                                     |  |  |  |  |  |  |  |  |
|    |                                                                                                              |                                                                                                                                                                                                                                                                                                                                                                        |                                                                                     |  |  |  |  |  |  |  |  |
|    |                                                                                                              |                                                                                                                                                                                                                                                                                                                                                                        |                                                                                     |  |  |  |  |  |  |  |  |
|    |                                                                                                              |                                                                                                                                                                                                                                                                                                                                                                        |                                                                                     |  |  |  |  |  |  |  |  |
| 5  | Payment or honoraria for lectures, presentations, speakers bureaus, manuscript writing or educational events | <input checked="" type="checkbox"/> <b>None</b><br><table border="1" style="width: 100%; border-collapse: collapse;"> <tr><td style="width: 50%; height: 15px;"></td><td style="width: 50%;"></td></tr> <tr><td style="height: 15px;"></td><td></td></tr> <tr><td style="height: 15px;"></td><td></td></tr> </table>                                                   |                                                                                     |  |  |  |  |  |  |  |  |
|    |                                                                                                              |                                                                                                                                                                                                                                                                                                                                                                        |                                                                                     |  |  |  |  |  |  |  |  |
|    |                                                                                                              |                                                                                                                                                                                                                                                                                                                                                                        |                                                                                     |  |  |  |  |  |  |  |  |
|    |                                                                                                              |                                                                                                                                                                                                                                                                                                                                                                        |                                                                                     |  |  |  |  |  |  |  |  |
| 6  | Payment for expert testimony                                                                                 | <input checked="" type="checkbox"/> <b>None</b><br><table border="1" style="width: 100%; border-collapse: collapse;"> <tr><td style="width: 50%; height: 15px;"></td><td style="width: 50%;"></td></tr> <tr><td style="height: 15px;"></td><td></td></tr> <tr><td style="height: 15px;"></td><td></td></tr> </table>                                                   |                                                                                     |  |  |  |  |  |  |  |  |
|    |                                                                                                              |                                                                                                                                                                                                                                                                                                                                                                        |                                                                                     |  |  |  |  |  |  |  |  |
|    |                                                                                                              |                                                                                                                                                                                                                                                                                                                                                                        |                                                                                     |  |  |  |  |  |  |  |  |
|    |                                                                                                              |                                                                                                                                                                                                                                                                                                                                                                        |                                                                                     |  |  |  |  |  |  |  |  |
| 7  | Support for attending meetings and/or travel                                                                 | <input checked="" type="checkbox"/> <b>None</b><br><table border="1" style="width: 100%; border-collapse: collapse;"> <tr><td style="width: 50%; height: 15px;"></td><td style="width: 50%;"></td></tr> <tr><td style="height: 15px;"></td><td></td></tr> <tr><td style="height: 15px;"></td><td></td></tr> </table>                                                   |                                                                                     |  |  |  |  |  |  |  |  |
|    |                                                                                                              |                                                                                                                                                                                                                                                                                                                                                                        |                                                                                     |  |  |  |  |  |  |  |  |
|    |                                                                                                              |                                                                                                                                                                                                                                                                                                                                                                        |                                                                                     |  |  |  |  |  |  |  |  |
|    |                                                                                                              |                                                                                                                                                                                                                                                                                                                                                                        |                                                                                     |  |  |  |  |  |  |  |  |
| 8  | Patents planned, issued or pending                                                                           | <input checked="" type="checkbox"/> <b>None</b><br><table border="1" style="width: 100%; border-collapse: collapse;"> <tr><td style="width: 50%; height: 15px;"></td><td style="width: 50%;"></td></tr> <tr><td style="height: 15px;"></td><td></td></tr> <tr><td style="height: 15px;"></td><td></td></tr> </table>                                                   |                                                                                     |  |  |  |  |  |  |  |  |
|    |                                                                                                              |                                                                                                                                                                                                                                                                                                                                                                        |                                                                                     |  |  |  |  |  |  |  |  |
|    |                                                                                                              |                                                                                                                                                                                                                                                                                                                                                                        |                                                                                     |  |  |  |  |  |  |  |  |
|    |                                                                                                              |                                                                                                                                                                                                                                                                                                                                                                        |                                                                                     |  |  |  |  |  |  |  |  |
| 9  | Participation on a Data Safety Monitoring Board or Advisory Board                                            | <input checked="" type="checkbox"/> <b>None</b><br><table border="1" style="width: 100%; border-collapse: collapse;"> <tr><td style="width: 50%; height: 15px;"></td><td style="width: 50%;"></td></tr> <tr><td style="height: 15px;"></td><td></td></tr> <tr><td style="height: 15px;"></td><td></td></tr> </table>                                                   |                                                                                     |  |  |  |  |  |  |  |  |
|    |                                                                                                              |                                                                                                                                                                                                                                                                                                                                                                        |                                                                                     |  |  |  |  |  |  |  |  |
|    |                                                                                                              |                                                                                                                                                                                                                                                                                                                                                                        |                                                                                     |  |  |  |  |  |  |  |  |
|    |                                                                                                              |                                                                                                                                                                                                                                                                                                                                                                        |                                                                                     |  |  |  |  |  |  |  |  |
| 10 | Leadership or fiduciary role in other board, society, committee or advocacy group, paid or unpaid            | <input checked="" type="checkbox"/> <b>None</b><br><table border="1" style="width: 100%; border-collapse: collapse;"> <tr><td style="width: 50%; height: 15px;"></td><td style="width: 50%;"></td></tr> <tr><td style="height: 15px;"></td><td></td></tr> <tr><td style="height: 15px;"></td><td></td></tr> </table>                                                   |                                                                                     |  |  |  |  |  |  |  |  |
|    |                                                                                                              |                                                                                                                                                                                                                                                                                                                                                                        |                                                                                     |  |  |  |  |  |  |  |  |
|    |                                                                                                              |                                                                                                                                                                                                                                                                                                                                                                        |                                                                                     |  |  |  |  |  |  |  |  |
|    |                                                                                                              |                                                                                                                                                                                                                                                                                                                                                                        |                                                                                     |  |  |  |  |  |  |  |  |

|           |                                                                                  | Name all entities with whom you have this relationship or indicate none (add rows as needed)                                                                                                                                                                                                                         | Specifications/Comments (e.g., if payments were made to you or to your institution) |  |  |  |  |  |  |
|-----------|----------------------------------------------------------------------------------|----------------------------------------------------------------------------------------------------------------------------------------------------------------------------------------------------------------------------------------------------------------------------------------------------------------------|-------------------------------------------------------------------------------------|--|--|--|--|--|--|
| <b>11</b> | Stock or stock options                                                           | <input checked="" type="checkbox"/> <b>None</b><br><table border="1" style="width: 100%; border-collapse: collapse;"> <tr><td style="width: 50%; height: 15px;"></td><td style="width: 50%;"></td></tr> <tr><td style="height: 15px;"></td><td></td></tr> <tr><td style="height: 15px;"></td><td></td></tr> </table> |                                                                                     |  |  |  |  |  |  |
|           |                                                                                  |                                                                                                                                                                                                                                                                                                                      |                                                                                     |  |  |  |  |  |  |
|           |                                                                                  |                                                                                                                                                                                                                                                                                                                      |                                                                                     |  |  |  |  |  |  |
|           |                                                                                  |                                                                                                                                                                                                                                                                                                                      |                                                                                     |  |  |  |  |  |  |
| <b>12</b> | Receipt of equipment, materials, drugs, medical writing, gifts or other services | <input checked="" type="checkbox"/> <b>None</b><br><table border="1" style="width: 100%; border-collapse: collapse;"> <tr><td style="width: 50%; height: 15px;"></td><td style="width: 50%;"></td></tr> <tr><td style="height: 15px;"></td><td></td></tr> <tr><td style="height: 15px;"></td><td></td></tr> </table> |                                                                                     |  |  |  |  |  |  |
|           |                                                                                  |                                                                                                                                                                                                                                                                                                                      |                                                                                     |  |  |  |  |  |  |
|           |                                                                                  |                                                                                                                                                                                                                                                                                                                      |                                                                                     |  |  |  |  |  |  |
|           |                                                                                  |                                                                                                                                                                                                                                                                                                                      |                                                                                     |  |  |  |  |  |  |
| <b>13</b> | Other financial or non-financial interests                                       | <input checked="" type="checkbox"/> <b>None</b><br><table border="1" style="width: 100%; border-collapse: collapse;"> <tr><td style="width: 50%; height: 15px;"></td><td style="width: 50%;"></td></tr> <tr><td style="height: 15px;"></td><td></td></tr> <tr><td style="height: 15px;"></td><td></td></tr> </table> |                                                                                     |  |  |  |  |  |  |
|           |                                                                                  |                                                                                                                                                                                                                                                                                                                      |                                                                                     |  |  |  |  |  |  |
|           |                                                                                  |                                                                                                                                                                                                                                                                                                                      |                                                                                     |  |  |  |  |  |  |
|           |                                                                                  |                                                                                                                                                                                                                                                                                                                      |                                                                                     |  |  |  |  |  |  |

**Please place an "X" next to the following statement to indicate your agreement:**

I certify that I have answered every question and have not altered the wording of any of the questions on this form.

## ICMJE DISCLOSURE FORM

**Date:** 8/7/2021

**Your Name:** Giuliana Amaddeo

**Manuscript Title:** Patient and physician expectation's regarding disease and treatment of advanced HCC: the prospective PERCEPTION1 study

**Manuscript Number (if known):** JHEPR-D-24-00819

In the interest of transparency, we ask you to disclose all relationships/activities/interests listed below that are related to the content of your manuscript. "Related" means any relation with for-profit or not-for-profit third parties whose interests may be affected by the content of the manuscript. Disclosure represents a commitment to transparency and does not necessarily indicate a bias. If you are in doubt about whether to list a relationship/activity/interest, it is preferable that you do so.

The author's relationships/activities/interests should be defined broadly. For example, if your manuscript pertains to the epidemiology of hypertension, you should declare all relationships with manufacturers of antihypertensive medication, even if that medication is not mentioned in the manuscript.

In item #1 below, report all support for the work reported in this manuscript without time limit. For all other items, the time frame for disclosure is the past 36 months.

|                                                           |                                                                                                                                                                                | Name all entities with whom you have this relationship or indicate none (add rows as needed)                                                                                                                                               | Specifications/Comments (e.g., if payments were made to you or to your institution) |  |  |  |  |  |                                                                                                                                                                                                                                                                                                  |  |  |  |  |  |  |
|-----------------------------------------------------------|--------------------------------------------------------------------------------------------------------------------------------------------------------------------------------|--------------------------------------------------------------------------------------------------------------------------------------------------------------------------------------------------------------------------------------------|-------------------------------------------------------------------------------------|--|--|--|--|--|--------------------------------------------------------------------------------------------------------------------------------------------------------------------------------------------------------------------------------------------------------------------------------------------------|--|--|--|--|--|--|
| <b>Time frame: Since the initial planning of the work</b> |                                                                                                                                                                                |                                                                                                                                                                                                                                            |                                                                                     |  |  |  |  |  |                                                                                                                                                                                                                                                                                                  |  |  |  |  |  |  |
| <b>1</b>                                                  | All support for the present manuscript (e.g., funding, provision of study materials, medical writing, article processing charges, etc.)<br><b>No time limit for this item.</b> | <input checked="" type="checkbox"/> <b>None</b><br><table border="1" style="width: 100%; height: 40px; margin-top: 5px;"> <tr><td style="width: 60%;"></td><td></td></tr> <tr><td></td><td></td></tr> <tr><td></td><td></td></tr> </table> |                                                                                     |  |  |  |  |  | <table border="1" style="width: 100%; height: 40px; margin-top: 5px;"> <tr><td style="width: 60%;"></td><td></td></tr> <tr><td></td><td></td></tr> <tr><td></td><td></td></tr> </table> <p style="font-size: small; color: gray; margin-top: 5px;">Click the tab key to add additional rows.</p> |  |  |  |  |  |  |
|                                                           |                                                                                                                                                                                |                                                                                                                                                                                                                                            |                                                                                     |  |  |  |  |  |                                                                                                                                                                                                                                                                                                  |  |  |  |  |  |  |
|                                                           |                                                                                                                                                                                |                                                                                                                                                                                                                                            |                                                                                     |  |  |  |  |  |                                                                                                                                                                                                                                                                                                  |  |  |  |  |  |  |
|                                                           |                                                                                                                                                                                |                                                                                                                                                                                                                                            |                                                                                     |  |  |  |  |  |                                                                                                                                                                                                                                                                                                  |  |  |  |  |  |  |
|                                                           |                                                                                                                                                                                |                                                                                                                                                                                                                                            |                                                                                     |  |  |  |  |  |                                                                                                                                                                                                                                                                                                  |  |  |  |  |  |  |
|                                                           |                                                                                                                                                                                |                                                                                                                                                                                                                                            |                                                                                     |  |  |  |  |  |                                                                                                                                                                                                                                                                                                  |  |  |  |  |  |  |
|                                                           |                                                                                                                                                                                |                                                                                                                                                                                                                                            |                                                                                     |  |  |  |  |  |                                                                                                                                                                                                                                                                                                  |  |  |  |  |  |  |
| <b>Time frame: past 36 months</b>                         |                                                                                                                                                                                |                                                                                                                                                                                                                                            |                                                                                     |  |  |  |  |  |                                                                                                                                                                                                                                                                                                  |  |  |  |  |  |  |
| <b>2</b>                                                  | Grants or contracts from any entity (if not indicated in item #1 above).                                                                                                       | <input checked="" type="checkbox"/> <b>None</b><br><table border="1" style="width: 100%; height: 40px; margin-top: 5px;"> <tr><td style="width: 60%;"></td><td></td></tr> <tr><td></td><td></td></tr> <tr><td></td><td></td></tr> </table> |                                                                                     |  |  |  |  |  | <table border="1" style="width: 100%; height: 40px; margin-top: 5px;"> <tr><td style="width: 60%;"></td><td></td></tr> <tr><td></td><td></td></tr> <tr><td></td><td></td></tr> </table>                                                                                                          |  |  |  |  |  |  |
|                                                           |                                                                                                                                                                                |                                                                                                                                                                                                                                            |                                                                                     |  |  |  |  |  |                                                                                                                                                                                                                                                                                                  |  |  |  |  |  |  |
|                                                           |                                                                                                                                                                                |                                                                                                                                                                                                                                            |                                                                                     |  |  |  |  |  |                                                                                                                                                                                                                                                                                                  |  |  |  |  |  |  |
|                                                           |                                                                                                                                                                                |                                                                                                                                                                                                                                            |                                                                                     |  |  |  |  |  |                                                                                                                                                                                                                                                                                                  |  |  |  |  |  |  |
|                                                           |                                                                                                                                                                                |                                                                                                                                                                                                                                            |                                                                                     |  |  |  |  |  |                                                                                                                                                                                                                                                                                                  |  |  |  |  |  |  |
|                                                           |                                                                                                                                                                                |                                                                                                                                                                                                                                            |                                                                                     |  |  |  |  |  |                                                                                                                                                                                                                                                                                                  |  |  |  |  |  |  |
|                                                           |                                                                                                                                                                                |                                                                                                                                                                                                                                            |                                                                                     |  |  |  |  |  |                                                                                                                                                                                                                                                                                                  |  |  |  |  |  |  |
| <b>3</b>                                                  | Royalties or licenses                                                                                                                                                          | <input checked="" type="checkbox"/> <b>None</b><br><table border="1" style="width: 100%; height: 40px; margin-top: 5px;"> <tr><td style="width: 60%;"></td><td></td></tr> <tr><td></td><td></td></tr> <tr><td></td><td></td></tr> </table> |                                                                                     |  |  |  |  |  | <table border="1" style="width: 100%; height: 40px; margin-top: 5px;"> <tr><td style="width: 60%;"></td><td></td></tr> <tr><td></td><td></td></tr> <tr><td></td><td></td></tr> </table>                                                                                                          |  |  |  |  |  |  |
|                                                           |                                                                                                                                                                                |                                                                                                                                                                                                                                            |                                                                                     |  |  |  |  |  |                                                                                                                                                                                                                                                                                                  |  |  |  |  |  |  |
|                                                           |                                                                                                                                                                                |                                                                                                                                                                                                                                            |                                                                                     |  |  |  |  |  |                                                                                                                                                                                                                                                                                                  |  |  |  |  |  |  |
|                                                           |                                                                                                                                                                                |                                                                                                                                                                                                                                            |                                                                                     |  |  |  |  |  |                                                                                                                                                                                                                                                                                                  |  |  |  |  |  |  |
|                                                           |                                                                                                                                                                                |                                                                                                                                                                                                                                            |                                                                                     |  |  |  |  |  |                                                                                                                                                                                                                                                                                                  |  |  |  |  |  |  |
|                                                           |                                                                                                                                                                                |                                                                                                                                                                                                                                            |                                                                                     |  |  |  |  |  |                                                                                                                                                                                                                                                                                                  |  |  |  |  |  |  |
|                                                           |                                                                                                                                                                                |                                                                                                                                                                                                                                            |                                                                                     |  |  |  |  |  |                                                                                                                                                                                                                                                                                                  |  |  |  |  |  |  |

|    |                                                                                                              | Name all entities with whom you have this relationship or indicate none (add rows as needed)                                                                                                                                                                                                                                                                           | Specifications/Comments (e.g., if payments were made to you or to your institution) |  |  |  |  |  |  |  |  |
|----|--------------------------------------------------------------------------------------------------------------|------------------------------------------------------------------------------------------------------------------------------------------------------------------------------------------------------------------------------------------------------------------------------------------------------------------------------------------------------------------------|-------------------------------------------------------------------------------------|--|--|--|--|--|--|--|--|
| 4  | Consulting fees                                                                                              | <input checked="" type="checkbox"/> <b>None</b><br><table border="1" style="width: 100%; border-collapse: collapse;"> <tr><td style="width: 50%; height: 15px;"></td><td style="width: 50%;"></td></tr> <tr><td style="height: 15px;"></td><td></td></tr> <tr><td style="height: 15px;"></td><td></td></tr> <tr><td style="height: 15px;"></td><td></td></tr> </table> |                                                                                     |  |  |  |  |  |  |  |  |
|    |                                                                                                              |                                                                                                                                                                                                                                                                                                                                                                        |                                                                                     |  |  |  |  |  |  |  |  |
|    |                                                                                                              |                                                                                                                                                                                                                                                                                                                                                                        |                                                                                     |  |  |  |  |  |  |  |  |
|    |                                                                                                              |                                                                                                                                                                                                                                                                                                                                                                        |                                                                                     |  |  |  |  |  |  |  |  |
|    |                                                                                                              |                                                                                                                                                                                                                                                                                                                                                                        |                                                                                     |  |  |  |  |  |  |  |  |
| 5  | Payment or honoraria for lectures, presentations, speakers bureaus, manuscript writing or educational events | <input checked="" type="checkbox"/> <b>None</b><br><table border="1" style="width: 100%; border-collapse: collapse;"> <tr><td style="width: 50%; height: 15px;"></td><td style="width: 50%;"></td></tr> <tr><td style="height: 15px;"></td><td></td></tr> <tr><td style="height: 15px;"></td><td></td></tr> </table>                                                   |                                                                                     |  |  |  |  |  |  |  |  |
|    |                                                                                                              |                                                                                                                                                                                                                                                                                                                                                                        |                                                                                     |  |  |  |  |  |  |  |  |
|    |                                                                                                              |                                                                                                                                                                                                                                                                                                                                                                        |                                                                                     |  |  |  |  |  |  |  |  |
|    |                                                                                                              |                                                                                                                                                                                                                                                                                                                                                                        |                                                                                     |  |  |  |  |  |  |  |  |
| 6  | Payment for expert testimony                                                                                 | <input checked="" type="checkbox"/> <b>None</b><br><table border="1" style="width: 100%; border-collapse: collapse;"> <tr><td style="width: 50%; height: 15px;"></td><td style="width: 50%;"></td></tr> <tr><td style="height: 15px;"></td><td></td></tr> <tr><td style="height: 15px;"></td><td></td></tr> </table>                                                   |                                                                                     |  |  |  |  |  |  |  |  |
|    |                                                                                                              |                                                                                                                                                                                                                                                                                                                                                                        |                                                                                     |  |  |  |  |  |  |  |  |
|    |                                                                                                              |                                                                                                                                                                                                                                                                                                                                                                        |                                                                                     |  |  |  |  |  |  |  |  |
|    |                                                                                                              |                                                                                                                                                                                                                                                                                                                                                                        |                                                                                     |  |  |  |  |  |  |  |  |
| 7  | Support for attending meetings and/or travel                                                                 | <input checked="" type="checkbox"/> <b>None</b><br><table border="1" style="width: 100%; border-collapse: collapse;"> <tr><td style="width: 50%; height: 15px;"></td><td style="width: 50%;"></td></tr> <tr><td style="height: 15px;"></td><td></td></tr> <tr><td style="height: 15px;"></td><td></td></tr> </table>                                                   |                                                                                     |  |  |  |  |  |  |  |  |
|    |                                                                                                              |                                                                                                                                                                                                                                                                                                                                                                        |                                                                                     |  |  |  |  |  |  |  |  |
|    |                                                                                                              |                                                                                                                                                                                                                                                                                                                                                                        |                                                                                     |  |  |  |  |  |  |  |  |
|    |                                                                                                              |                                                                                                                                                                                                                                                                                                                                                                        |                                                                                     |  |  |  |  |  |  |  |  |
| 8  | Patents planned, issued or pending                                                                           | <input checked="" type="checkbox"/> <b>None</b><br><table border="1" style="width: 100%; border-collapse: collapse;"> <tr><td style="width: 50%; height: 15px;"></td><td style="width: 50%;"></td></tr> <tr><td style="height: 15px;"></td><td></td></tr> <tr><td style="height: 15px;"></td><td></td></tr> </table>                                                   |                                                                                     |  |  |  |  |  |  |  |  |
|    |                                                                                                              |                                                                                                                                                                                                                                                                                                                                                                        |                                                                                     |  |  |  |  |  |  |  |  |
|    |                                                                                                              |                                                                                                                                                                                                                                                                                                                                                                        |                                                                                     |  |  |  |  |  |  |  |  |
|    |                                                                                                              |                                                                                                                                                                                                                                                                                                                                                                        |                                                                                     |  |  |  |  |  |  |  |  |
| 9  | Participation on a Data Safety Monitoring Board or Advisory Board                                            | <input checked="" type="checkbox"/> <b>None</b><br><table border="1" style="width: 100%; border-collapse: collapse;"> <tr><td style="width: 50%; height: 15px;"></td><td style="width: 50%;"></td></tr> <tr><td style="height: 15px;"></td><td></td></tr> <tr><td style="height: 15px;"></td><td></td></tr> </table>                                                   |                                                                                     |  |  |  |  |  |  |  |  |
|    |                                                                                                              |                                                                                                                                                                                                                                                                                                                                                                        |                                                                                     |  |  |  |  |  |  |  |  |
|    |                                                                                                              |                                                                                                                                                                                                                                                                                                                                                                        |                                                                                     |  |  |  |  |  |  |  |  |
|    |                                                                                                              |                                                                                                                                                                                                                                                                                                                                                                        |                                                                                     |  |  |  |  |  |  |  |  |
| 10 | Leadership or fiduciary role in other board, society, committee or advocacy group, paid or unpaid            | <input checked="" type="checkbox"/> <b>None</b><br><table border="1" style="width: 100%; border-collapse: collapse;"> <tr><td style="width: 50%; height: 15px;"></td><td style="width: 50%;"></td></tr> <tr><td style="height: 15px;"></td><td></td></tr> <tr><td style="height: 15px;"></td><td></td></tr> </table>                                                   |                                                                                     |  |  |  |  |  |  |  |  |
|    |                                                                                                              |                                                                                                                                                                                                                                                                                                                                                                        |                                                                                     |  |  |  |  |  |  |  |  |
|    |                                                                                                              |                                                                                                                                                                                                                                                                                                                                                                        |                                                                                     |  |  |  |  |  |  |  |  |
|    |                                                                                                              |                                                                                                                                                                                                                                                                                                                                                                        |                                                                                     |  |  |  |  |  |  |  |  |

|           |                                                                                  | Name all entities with whom you have this relationship or indicate none (add rows as needed)                                                                                                                                                                                                                         | Specifications/Comments (e.g., if payments were made to you or to your institution) |  |  |  |  |  |  |
|-----------|----------------------------------------------------------------------------------|----------------------------------------------------------------------------------------------------------------------------------------------------------------------------------------------------------------------------------------------------------------------------------------------------------------------|-------------------------------------------------------------------------------------|--|--|--|--|--|--|
| <b>11</b> | Stock or stock options                                                           | <input checked="" type="checkbox"/> <b>None</b><br><table border="1" style="width: 100%; border-collapse: collapse;"> <tr><td style="width: 50%; height: 15px;"></td><td style="width: 50%;"></td></tr> <tr><td style="height: 15px;"></td><td></td></tr> <tr><td style="height: 15px;"></td><td></td></tr> </table> |                                                                                     |  |  |  |  |  |  |
|           |                                                                                  |                                                                                                                                                                                                                                                                                                                      |                                                                                     |  |  |  |  |  |  |
|           |                                                                                  |                                                                                                                                                                                                                                                                                                                      |                                                                                     |  |  |  |  |  |  |
|           |                                                                                  |                                                                                                                                                                                                                                                                                                                      |                                                                                     |  |  |  |  |  |  |
| <b>12</b> | Receipt of equipment, materials, drugs, medical writing, gifts or other services | <input checked="" type="checkbox"/> <b>None</b><br><table border="1" style="width: 100%; border-collapse: collapse;"> <tr><td style="width: 50%; height: 15px;"></td><td style="width: 50%;"></td></tr> <tr><td style="height: 15px;"></td><td></td></tr> <tr><td style="height: 15px;"></td><td></td></tr> </table> |                                                                                     |  |  |  |  |  |  |
|           |                                                                                  |                                                                                                                                                                                                                                                                                                                      |                                                                                     |  |  |  |  |  |  |
|           |                                                                                  |                                                                                                                                                                                                                                                                                                                      |                                                                                     |  |  |  |  |  |  |
|           |                                                                                  |                                                                                                                                                                                                                                                                                                                      |                                                                                     |  |  |  |  |  |  |
| <b>13</b> | Other financial or non-financial interests                                       | <input checked="" type="checkbox"/> <b>None</b><br><table border="1" style="width: 100%; border-collapse: collapse;"> <tr><td style="width: 50%; height: 15px;"></td><td style="width: 50%;"></td></tr> <tr><td style="height: 15px;"></td><td></td></tr> <tr><td style="height: 15px;"></td><td></td></tr> </table> |                                                                                     |  |  |  |  |  |  |
|           |                                                                                  |                                                                                                                                                                                                                                                                                                                      |                                                                                     |  |  |  |  |  |  |
|           |                                                                                  |                                                                                                                                                                                                                                                                                                                      |                                                                                     |  |  |  |  |  |  |
|           |                                                                                  |                                                                                                                                                                                                                                                                                                                      |                                                                                     |  |  |  |  |  |  |

**Please place an "X" next to the following statement to indicate your agreement:**

I certify that I have answered every question and have not altered the wording of any of the questions on this form.

## ICMJE DISCLOSURE FORM

**Date:** 8/7/2021

**Your Name:** Stanislas Pol

**Manuscript Title:** Patient and physician expectation's regarding disease and treatment of advanced HCC: the prospective PERCEPTION1 study

**Manuscript Number (if known):** JHEPR-D-24-00819

In the interest of transparency, we ask you to disclose all relationships/activities/interests listed below that are related to the content of your manuscript. "Related" means any relation with for-profit or not-for-profit third parties whose interests may be affected by the content of the manuscript. Disclosure represents a commitment to transparency and does not necessarily indicate a bias. If you are in doubt about whether to list a relationship/activity/interest, it is preferable that you do so.

The author's relationships/activities/interests should be defined broadly. For example, if your manuscript pertains to the epidemiology of hypertension, you should declare all relationships with manufacturers of antihypertensive medication, even if that medication is not mentioned in the manuscript.

In item #1 below, report all support for the work reported in this manuscript without time limit. For all other items, the time frame for disclosure is the past 36 months.

|                                                           |                                                                                                                                                                                | Name all entities with whom you have this relationship or indicate none (add rows as needed)                                                                                                                                                                  | Specifications/Comments (e.g., if payments were made to you or to your institution) |  |  |  |  |  |                                                                                                                                                                                                                                                                                                  |  |  |  |  |  |  |
|-----------------------------------------------------------|--------------------------------------------------------------------------------------------------------------------------------------------------------------------------------|---------------------------------------------------------------------------------------------------------------------------------------------------------------------------------------------------------------------------------------------------------------|-------------------------------------------------------------------------------------|--|--|--|--|--|--------------------------------------------------------------------------------------------------------------------------------------------------------------------------------------------------------------------------------------------------------------------------------------------------|--|--|--|--|--|--|
| <b>Time frame: Since the initial planning of the work</b> |                                                                                                                                                                                |                                                                                                                                                                                                                                                               |                                                                                     |  |  |  |  |  |                                                                                                                                                                                                                                                                                                  |  |  |  |  |  |  |
| <b>1</b>                                                  | All support for the present manuscript (e.g., funding, provision of study materials, medical writing, article processing charges, etc.)<br><b>No time limit for this item.</b> | <input checked="" type="checkbox"/> <b>None</b><br><table border="1" style="width: 100%; height: 40px; margin-top: 5px;"> <tr><td style="width: 60%;"></td><td></td></tr> <tr><td></td><td></td></tr> <tr><td></td><td></td></tr> </table>                    |                                                                                     |  |  |  |  |  | <table border="1" style="width: 100%; height: 40px; margin-top: 5px;"> <tr><td style="width: 60%;"></td><td></td></tr> <tr><td></td><td></td></tr> <tr><td></td><td></td></tr> </table> <p style="font-size: small; color: gray; margin-top: 5px;">Click the tab key to add additional rows.</p> |  |  |  |  |  |  |
|                                                           |                                                                                                                                                                                |                                                                                                                                                                                                                                                               |                                                                                     |  |  |  |  |  |                                                                                                                                                                                                                                                                                                  |  |  |  |  |  |  |
|                                                           |                                                                                                                                                                                |                                                                                                                                                                                                                                                               |                                                                                     |  |  |  |  |  |                                                                                                                                                                                                                                                                                                  |  |  |  |  |  |  |
|                                                           |                                                                                                                                                                                |                                                                                                                                                                                                                                                               |                                                                                     |  |  |  |  |  |                                                                                                                                                                                                                                                                                                  |  |  |  |  |  |  |
|                                                           |                                                                                                                                                                                |                                                                                                                                                                                                                                                               |                                                                                     |  |  |  |  |  |                                                                                                                                                                                                                                                                                                  |  |  |  |  |  |  |
|                                                           |                                                                                                                                                                                |                                                                                                                                                                                                                                                               |                                                                                     |  |  |  |  |  |                                                                                                                                                                                                                                                                                                  |  |  |  |  |  |  |
|                                                           |                                                                                                                                                                                |                                                                                                                                                                                                                                                               |                                                                                     |  |  |  |  |  |                                                                                                                                                                                                                                                                                                  |  |  |  |  |  |  |
| <b>Time frame: past 36 months</b>                         |                                                                                                                                                                                |                                                                                                                                                                                                                                                               |                                                                                     |  |  |  |  |  |                                                                                                                                                                                                                                                                                                  |  |  |  |  |  |  |
| <b>2</b>                                                  | Grants or contracts from any entity (if not indicated in item #1 above).                                                                                                       | <input type="checkbox"/> <b>None</b><br><table border="1" style="width: 100%; height: 40px; margin-top: 5px;"> <tr><td style="width: 60%;">grants from Gilead and Abbvie.</td><td></td></tr> <tr><td></td><td></td></tr> <tr><td></td><td></td></tr> </table> | grants from Gilead and Abbvie.                                                      |  |  |  |  |  | <table border="1" style="width: 100%; height: 40px; margin-top: 5px;"> <tr><td style="width: 60%;"></td><td></td></tr> <tr><td></td><td></td></tr> <tr><td></td><td></td></tr> </table>                                                                                                          |  |  |  |  |  |  |
| grants from Gilead and Abbvie.                            |                                                                                                                                                                                |                                                                                                                                                                                                                                                               |                                                                                     |  |  |  |  |  |                                                                                                                                                                                                                                                                                                  |  |  |  |  |  |  |
|                                                           |                                                                                                                                                                                |                                                                                                                                                                                                                                                               |                                                                                     |  |  |  |  |  |                                                                                                                                                                                                                                                                                                  |  |  |  |  |  |  |
|                                                           |                                                                                                                                                                                |                                                                                                                                                                                                                                                               |                                                                                     |  |  |  |  |  |                                                                                                                                                                                                                                                                                                  |  |  |  |  |  |  |
|                                                           |                                                                                                                                                                                |                                                                                                                                                                                                                                                               |                                                                                     |  |  |  |  |  |                                                                                                                                                                                                                                                                                                  |  |  |  |  |  |  |
|                                                           |                                                                                                                                                                                |                                                                                                                                                                                                                                                               |                                                                                     |  |  |  |  |  |                                                                                                                                                                                                                                                                                                  |  |  |  |  |  |  |
|                                                           |                                                                                                                                                                                |                                                                                                                                                                                                                                                               |                                                                                     |  |  |  |  |  |                                                                                                                                                                                                                                                                                                  |  |  |  |  |  |  |
| <b>3</b>                                                  | Royalties or licenses                                                                                                                                                          | <input checked="" type="checkbox"/> <b>None</b><br><table border="1" style="width: 100%; height: 40px; margin-top: 5px;"> <tr><td style="width: 60%;"></td><td></td></tr> <tr><td></td><td></td></tr> <tr><td></td><td></td></tr> </table>                    |                                                                                     |  |  |  |  |  | <table border="1" style="width: 100%; height: 40px; margin-top: 5px;"> <tr><td style="width: 60%;"></td><td></td></tr> <tr><td></td><td></td></tr> <tr><td></td><td></td></tr> </table>                                                                                                          |  |  |  |  |  |  |
|                                                           |                                                                                                                                                                                |                                                                                                                                                                                                                                                               |                                                                                     |  |  |  |  |  |                                                                                                                                                                                                                                                                                                  |  |  |  |  |  |  |
|                                                           |                                                                                                                                                                                |                                                                                                                                                                                                                                                               |                                                                                     |  |  |  |  |  |                                                                                                                                                                                                                                                                                                  |  |  |  |  |  |  |
|                                                           |                                                                                                                                                                                |                                                                                                                                                                                                                                                               |                                                                                     |  |  |  |  |  |                                                                                                                                                                                                                                                                                                  |  |  |  |  |  |  |
|                                                           |                                                                                                                                                                                |                                                                                                                                                                                                                                                               |                                                                                     |  |  |  |  |  |                                                                                                                                                                                                                                                                                                  |  |  |  |  |  |  |
|                                                           |                                                                                                                                                                                |                                                                                                                                                                                                                                                               |                                                                                     |  |  |  |  |  |                                                                                                                                                                                                                                                                                                  |  |  |  |  |  |  |
|                                                           |                                                                                                                                                                                |                                                                                                                                                                                                                                                               |                                                                                     |  |  |  |  |  |                                                                                                                                                                                                                                                                                                  |  |  |  |  |  |  |

|    |                                                                                                              | Name all entities with whom you have this relationship or indicate none (add rows as needed) | Specifications/Comments (e.g., if payments were made to you or to your institution) |
|----|--------------------------------------------------------------------------------------------------------------|----------------------------------------------------------------------------------------------|-------------------------------------------------------------------------------------|
| 4  | Consulting fees                                                                                              | <input type="checkbox"/> <b>None</b>                                                         |                                                                                     |
|    |                                                                                                              | Janssen, Gilead, Abbvie, Novo-Nordisk, LFB, Pfizer, Vivv                                     |                                                                                     |
|    |                                                                                                              |                                                                                              |                                                                                     |
|    |                                                                                                              |                                                                                              |                                                                                     |
| 5  | Payment or honoraria for lectures, presentations, speakers bureaus, manuscript writing or educational events | <input checked="" type="checkbox"/> <b>None</b>                                              |                                                                                     |
|    |                                                                                                              |                                                                                              |                                                                                     |
|    |                                                                                                              |                                                                                              |                                                                                     |
|    |                                                                                                              |                                                                                              |                                                                                     |
| 6  | Payment for expert testimony                                                                                 | <input checked="" type="checkbox"/> <b>None</b>                                              |                                                                                     |
|    |                                                                                                              |                                                                                              |                                                                                     |
|    |                                                                                                              |                                                                                              |                                                                                     |
|    |                                                                                                              |                                                                                              |                                                                                     |
| 7  | Support for attending meetings and/or travel                                                                 | <input checked="" type="checkbox"/> <b>None</b>                                              |                                                                                     |
|    |                                                                                                              |                                                                                              |                                                                                     |
|    |                                                                                                              |                                                                                              |                                                                                     |
|    |                                                                                                              |                                                                                              |                                                                                     |
| 8  | Patents planned, issued or pending                                                                           | <input checked="" type="checkbox"/> <b>None</b>                                              |                                                                                     |
|    |                                                                                                              |                                                                                              |                                                                                     |
|    |                                                                                                              |                                                                                              |                                                                                     |
|    |                                                                                                              |                                                                                              |                                                                                     |
| 9  | Participation on a Data Safety Monitoring Board or Advisory Board                                            | <input checked="" type="checkbox"/> <b>None</b>                                              |                                                                                     |
|    |                                                                                                              |                                                                                              |                                                                                     |
|    |                                                                                                              |                                                                                              |                                                                                     |
|    |                                                                                                              |                                                                                              |                                                                                     |
| 10 | Leadership or fiduciary role in other board, society, committee or advocacy group, paid or unpaid            | <input checked="" type="checkbox"/> <b>None</b>                                              |                                                                                     |
|    |                                                                                                              |                                                                                              |                                                                                     |
|    |                                                                                                              |                                                                                              |                                                                                     |
|    |                                                                                                              |                                                                                              |                                                                                     |

|           |                                                                                  | Name all entities with whom you have this relationship or indicate none (add rows as needed)                                                                                                                                                                                                                         | Specifications/Comments (e.g., if payments were made to you or to your institution) |  |  |  |  |  |  |
|-----------|----------------------------------------------------------------------------------|----------------------------------------------------------------------------------------------------------------------------------------------------------------------------------------------------------------------------------------------------------------------------------------------------------------------|-------------------------------------------------------------------------------------|--|--|--|--|--|--|
| <b>11</b> | Stock or stock options                                                           | <input checked="" type="checkbox"/> <b>None</b><br><table border="1" style="width: 100%; border-collapse: collapse;"> <tr><td style="width: 50%; height: 20px;"></td><td style="width: 50%;"></td></tr> <tr><td style="height: 20px;"></td><td></td></tr> <tr><td style="height: 20px;"></td><td></td></tr> </table> |                                                                                     |  |  |  |  |  |  |
|           |                                                                                  |                                                                                                                                                                                                                                                                                                                      |                                                                                     |  |  |  |  |  |  |
|           |                                                                                  |                                                                                                                                                                                                                                                                                                                      |                                                                                     |  |  |  |  |  |  |
|           |                                                                                  |                                                                                                                                                                                                                                                                                                                      |                                                                                     |  |  |  |  |  |  |
| <b>12</b> | Receipt of equipment, materials, drugs, medical writing, gifts or other services | <input checked="" type="checkbox"/> <b>None</b><br><table border="1" style="width: 100%; border-collapse: collapse;"> <tr><td style="width: 50%; height: 20px;"></td><td style="width: 50%;"></td></tr> <tr><td style="height: 20px;"></td><td></td></tr> <tr><td style="height: 20px;"></td><td></td></tr> </table> |                                                                                     |  |  |  |  |  |  |
|           |                                                                                  |                                                                                                                                                                                                                                                                                                                      |                                                                                     |  |  |  |  |  |  |
|           |                                                                                  |                                                                                                                                                                                                                                                                                                                      |                                                                                     |  |  |  |  |  |  |
|           |                                                                                  |                                                                                                                                                                                                                                                                                                                      |                                                                                     |  |  |  |  |  |  |
| <b>13</b> | Other financial or non-financial interests                                       | <input checked="" type="checkbox"/> <b>None</b><br><table border="1" style="width: 100%; border-collapse: collapse;"> <tr><td style="width: 50%; height: 20px;"></td><td style="width: 50%;"></td></tr> <tr><td style="height: 20px;"></td><td></td></tr> <tr><td style="height: 20px;"></td><td></td></tr> </table> |                                                                                     |  |  |  |  |  |  |
|           |                                                                                  |                                                                                                                                                                                                                                                                                                                      |                                                                                     |  |  |  |  |  |  |
|           |                                                                                  |                                                                                                                                                                                                                                                                                                                      |                                                                                     |  |  |  |  |  |  |
|           |                                                                                  |                                                                                                                                                                                                                                                                                                                      |                                                                                     |  |  |  |  |  |  |

**Please place an "X" next to the following statement to indicate your agreement:**

I certify that I have answered every question and have not altered the wording of any of the questions on this form.



## ICMJE DISCLOSURE FORM

**Date:** 8/7/2021

**Your Name:** Pierre Nahon

**Manuscript Title:** Patient and physician expectation's regarding disease and treatment of advanced HCC: the prospective PERCEPTION1 study

**Manuscript Number (if known):** JHEPR-D-24-00819

In the interest of transparency, we ask you to disclose all relationships/activities/interests listed below that are related to the content of your manuscript. "Related" means any relation with for-profit or not-for-profit third parties whose interests may be affected by the content of the manuscript. Disclosure represents a commitment to transparency and does not necessarily indicate a bias. If you are in doubt about whether to list a relationship/activity/interest, it is preferable that you do so.

The author's relationships/activities/interests should be defined broadly. For example, if your manuscript pertains to the epidemiology of hypertension, you should declare all relationships with manufacturers of antihypertensive medication, even if that medication is not mentioned in the manuscript.

In item #1 below, report all support for the work reported in this manuscript without time limit. For all other items, the time frame for disclosure is the past 36 months.

|                                                           |                                                                                                                                                                                | Name all entities with whom you have this relationship or indicate none (add rows as needed)                                                                                                                                                            | Specifications/Comments (e.g., if payments were made to you or to your institution) |  |  |  |  |  |                                           |
|-----------------------------------------------------------|--------------------------------------------------------------------------------------------------------------------------------------------------------------------------------|---------------------------------------------------------------------------------------------------------------------------------------------------------------------------------------------------------------------------------------------------------|-------------------------------------------------------------------------------------|--|--|--|--|--|-------------------------------------------|
| <b>Time frame: Since the initial planning of the work</b> |                                                                                                                                                                                |                                                                                                                                                                                                                                                         |                                                                                     |  |  |  |  |  |                                           |
| <b>1</b>                                                  | All support for the present manuscript (e.g., funding, provision of study materials, medical writing, article processing charges, etc.)<br><b>No time limit for this item.</b> | <input checked="" type="checkbox"/> <b>None</b><br><table border="1" style="width: 100%; height: 40px; margin-top: 5px;"> <tr><td style="width: 60%;"></td><td></td></tr> <tr><td></td><td></td></tr> <tr><td></td><td></td></tr> </table>              |                                                                                     |  |  |  |  |  | Click the tab key to add additional rows. |
|                                                           |                                                                                                                                                                                |                                                                                                                                                                                                                                                         |                                                                                     |  |  |  |  |  |                                           |
|                                                           |                                                                                                                                                                                |                                                                                                                                                                                                                                                         |                                                                                     |  |  |  |  |  |                                           |
|                                                           |                                                                                                                                                                                |                                                                                                                                                                                                                                                         |                                                                                     |  |  |  |  |  |                                           |
| <b>Time frame: past 36 months</b>                         |                                                                                                                                                                                |                                                                                                                                                                                                                                                         |                                                                                     |  |  |  |  |  |                                           |
| <b>2</b>                                                  | Grants or contracts from any entity (if not indicated in item #1 above).                                                                                                       | <input type="checkbox"/> <b>None</b><br><table border="1" style="width: 100%; height: 40px; margin-top: 5px;"> <tr><td style="width: 60%;">ASTRA ZENECA, BMS, EISAI</td><td></td></tr> <tr><td></td><td></td></tr> <tr><td></td><td></td></tr> </table> | ASTRA ZENECA, BMS, EISAI                                                            |  |  |  |  |  |                                           |
| ASTRA ZENECA, BMS, EISAI                                  |                                                                                                                                                                                |                                                                                                                                                                                                                                                         |                                                                                     |  |  |  |  |  |                                           |
|                                                           |                                                                                                                                                                                |                                                                                                                                                                                                                                                         |                                                                                     |  |  |  |  |  |                                           |
|                                                           |                                                                                                                                                                                |                                                                                                                                                                                                                                                         |                                                                                     |  |  |  |  |  |                                           |
| <b>3</b>                                                  | Royalties or licenses                                                                                                                                                          | <input checked="" type="checkbox"/> <b>None</b><br><table border="1" style="width: 100%; height: 40px; margin-top: 5px;"> <tr><td style="width: 60%;"></td><td></td></tr> <tr><td></td><td></td></tr> <tr><td></td><td></td></tr> </table>              |                                                                                     |  |  |  |  |  |                                           |
|                                                           |                                                                                                                                                                                |                                                                                                                                                                                                                                                         |                                                                                     |  |  |  |  |  |                                           |
|                                                           |                                                                                                                                                                                |                                                                                                                                                                                                                                                         |                                                                                     |  |  |  |  |  |                                           |
|                                                           |                                                                                                                                                                                |                                                                                                                                                                                                                                                         |                                                                                     |  |  |  |  |  |                                           |

|    |                                                                                                              | Name all entities with whom you have this relationship or indicate none (add rows as needed) | Specifications/Comments (e.g., if payments were made to you or to your institution) |
|----|--------------------------------------------------------------------------------------------------------------|----------------------------------------------------------------------------------------------|-------------------------------------------------------------------------------------|
| 4  | Consulting fees                                                                                              | <input type="checkbox"/> None                                                                |                                                                                     |
|    |                                                                                                              | ASTRA ZENECA, BMS, EISAI, ROCHE                                                              |                                                                                     |
|    |                                                                                                              |                                                                                              |                                                                                     |
|    |                                                                                                              |                                                                                              |                                                                                     |
| 5  | Payment or honoraria for lectures, presentations, speakers bureaus, manuscript writing or educational events | <input type="checkbox"/> None                                                                |                                                                                     |
|    |                                                                                                              | ASTRA ZENECA, BMS, EISAI, ROCHE                                                              |                                                                                     |
|    |                                                                                                              |                                                                                              |                                                                                     |
|    |                                                                                                              |                                                                                              |                                                                                     |
| 6  | Payment for expert testimony                                                                                 | <input checked="" type="checkbox"/> None                                                     |                                                                                     |
|    |                                                                                                              |                                                                                              |                                                                                     |
|    |                                                                                                              |                                                                                              |                                                                                     |
|    |                                                                                                              |                                                                                              |                                                                                     |
| 7  | Support for attending meetings and/or travel                                                                 | <input type="checkbox"/> None                                                                |                                                                                     |
|    |                                                                                                              | ASTRA ZENECA, BMS, EISAI, ROCHE                                                              |                                                                                     |
|    |                                                                                                              |                                                                                              |                                                                                     |
|    |                                                                                                              |                                                                                              |                                                                                     |
| 8  | Patents planned, issued or pending                                                                           | <input checked="" type="checkbox"/> None                                                     |                                                                                     |
|    |                                                                                                              |                                                                                              |                                                                                     |
|    |                                                                                                              |                                                                                              |                                                                                     |
|    |                                                                                                              |                                                                                              |                                                                                     |
| 9  | Participation on a Data Safety Monitoring Board or Advisory Board                                            | <input type="checkbox"/> None                                                                |                                                                                     |
|    |                                                                                                              | ASTRA ZENECA, BMS, EISAI, ROCHE                                                              |                                                                                     |
|    |                                                                                                              |                                                                                              |                                                                                     |
|    |                                                                                                              |                                                                                              |                                                                                     |
| 10 | Leadership or fiduciary role in other board, society, committee or advocacy group, paid or unpaid            | <input checked="" type="checkbox"/> None                                                     |                                                                                     |
|    |                                                                                                              |                                                                                              |                                                                                     |
|    |                                                                                                              |                                                                                              |                                                                                     |
|    |                                                                                                              |                                                                                              |                                                                                     |

|           |                                                                                  | Name all entities with whom you have this relationship or indicate none (add rows as needed)                                                                                                                                                                                                                         | Specifications/Comments (e.g., if payments were made to you or to your institution) |  |  |  |  |  |  |
|-----------|----------------------------------------------------------------------------------|----------------------------------------------------------------------------------------------------------------------------------------------------------------------------------------------------------------------------------------------------------------------------------------------------------------------|-------------------------------------------------------------------------------------|--|--|--|--|--|--|
| <b>11</b> | Stock or stock options                                                           | <input checked="" type="checkbox"/> <b>None</b><br><table border="1" style="width: 100%; border-collapse: collapse;"> <tr><td style="width: 50%; height: 15px;"></td><td style="width: 50%;"></td></tr> <tr><td style="height: 15px;"></td><td></td></tr> <tr><td style="height: 15px;"></td><td></td></tr> </table> |                                                                                     |  |  |  |  |  |  |
|           |                                                                                  |                                                                                                                                                                                                                                                                                                                      |                                                                                     |  |  |  |  |  |  |
|           |                                                                                  |                                                                                                                                                                                                                                                                                                                      |                                                                                     |  |  |  |  |  |  |
|           |                                                                                  |                                                                                                                                                                                                                                                                                                                      |                                                                                     |  |  |  |  |  |  |
| <b>12</b> | Receipt of equipment, materials, drugs, medical writing, gifts or other services | <input checked="" type="checkbox"/> <b>None</b><br><table border="1" style="width: 100%; border-collapse: collapse;"> <tr><td style="width: 50%; height: 15px;"></td><td style="width: 50%;"></td></tr> <tr><td style="height: 15px;"></td><td></td></tr> <tr><td style="height: 15px;"></td><td></td></tr> </table> |                                                                                     |  |  |  |  |  |  |
|           |                                                                                  |                                                                                                                                                                                                                                                                                                                      |                                                                                     |  |  |  |  |  |  |
|           |                                                                                  |                                                                                                                                                                                                                                                                                                                      |                                                                                     |  |  |  |  |  |  |
|           |                                                                                  |                                                                                                                                                                                                                                                                                                                      |                                                                                     |  |  |  |  |  |  |
| <b>13</b> | Other financial or non-financial interests                                       | <input checked="" type="checkbox"/> <b>None</b><br><table border="1" style="width: 100%; border-collapse: collapse;"> <tr><td style="width: 50%; height: 15px;"></td><td style="width: 50%;"></td></tr> <tr><td style="height: 15px;"></td><td></td></tr> <tr><td style="height: 15px;"></td><td></td></tr> </table> |                                                                                     |  |  |  |  |  |  |
|           |                                                                                  |                                                                                                                                                                                                                                                                                                                      |                                                                                     |  |  |  |  |  |  |
|           |                                                                                  |                                                                                                                                                                                                                                                                                                                      |                                                                                     |  |  |  |  |  |  |
|           |                                                                                  |                                                                                                                                                                                                                                                                                                                      |                                                                                     |  |  |  |  |  |  |

**Please place an "X" next to the following statement to indicate your agreement:**

I certify that I have answered every question and have not altered the wording of any of the questions on this form.

## ICMJE DISCLOSURE FORM

**Date:** 8/7/2021

**Your Name:** Ganne-Carrié

**Manuscript Title:** Patient and physician expectation's regarding disease and treatment of advanced HCC: the prospective PERCEPTION1 study

**Manuscript Number (if known):** JHEPR-D-24-00819

In the interest of transparency, we ask you to disclose all relationships/activities/interests listed below that are related to the content of your manuscript. "Related" means any relation with for-profit or not-for-profit third parties whose interests may be affected by the content of the manuscript. Disclosure represents a commitment to transparency and does not necessarily indicate a bias. If you are in doubt about whether to list a relationship/activity/interest, it is preferable that you do so.

The author's relationships/activities/interests should be defined broadly. For example, if your manuscript pertains to the epidemiology of hypertension, you should declare all relationships with manufacturers of antihypertensive medication, even if that medication is not mentioned in the manuscript.

In item #1 below, report all support for the work reported in this manuscript without time limit. For all other items, the time frame for disclosure is the past 36 months.

|                                                           | Name all entities with whom you have this relationship or indicate none (add rows as needed)                                                                                   | Specifications/Comments (e.g., if payments were made to you or to your institution)                                                                                                                                                                                                                                                                                     |  |  |  |  |  |  |
|-----------------------------------------------------------|--------------------------------------------------------------------------------------------------------------------------------------------------------------------------------|-------------------------------------------------------------------------------------------------------------------------------------------------------------------------------------------------------------------------------------------------------------------------------------------------------------------------------------------------------------------------|--|--|--|--|--|--|
| <b>Time frame: Since the initial planning of the work</b> |                                                                                                                                                                                |                                                                                                                                                                                                                                                                                                                                                                         |  |  |  |  |  |  |
| <b>1</b>                                                  | All support for the present manuscript (e.g., funding, provision of study materials, medical writing, article processing charges, etc.)<br><b>No time limit for this item.</b> | <input checked="" type="checkbox"/> <b>None</b><br><table border="1" style="width: 100%; height: 40px; margin-top: 5px;"> <tr><td style="width: 60%;"></td><td style="width: 40%;"></td></tr> <tr><td></td><td></td></tr> <tr><td></td><td></td></tr> </table> <p style="font-size: small; color: gray; margin-top: 5px;">Click the tab key to add additional rows.</p> |  |  |  |  |  |  |
|                                                           |                                                                                                                                                                                |                                                                                                                                                                                                                                                                                                                                                                         |  |  |  |  |  |  |
|                                                           |                                                                                                                                                                                |                                                                                                                                                                                                                                                                                                                                                                         |  |  |  |  |  |  |
|                                                           |                                                                                                                                                                                |                                                                                                                                                                                                                                                                                                                                                                         |  |  |  |  |  |  |
| <b>Time frame: past 36 months</b>                         |                                                                                                                                                                                |                                                                                                                                                                                                                                                                                                                                                                         |  |  |  |  |  |  |
| <b>2</b>                                                  | Grants or contracts from any entity (if not indicated in item #1 above).                                                                                                       | <input checked="" type="checkbox"/> <b>None</b><br><table border="1" style="width: 100%; height: 40px; margin-top: 5px;"> <tr><td style="width: 60%;"></td><td style="width: 40%;"></td></tr> <tr><td></td><td></td></tr> <tr><td></td><td></td></tr> </table>                                                                                                          |  |  |  |  |  |  |
|                                                           |                                                                                                                                                                                |                                                                                                                                                                                                                                                                                                                                                                         |  |  |  |  |  |  |
|                                                           |                                                                                                                                                                                |                                                                                                                                                                                                                                                                                                                                                                         |  |  |  |  |  |  |
|                                                           |                                                                                                                                                                                |                                                                                                                                                                                                                                                                                                                                                                         |  |  |  |  |  |  |
| <b>3</b>                                                  | Royalties or licenses                                                                                                                                                          | <input checked="" type="checkbox"/> <b>None</b><br><table border="1" style="width: 100%; height: 40px; margin-top: 5px;"> <tr><td style="width: 60%;"></td><td style="width: 40%;"></td></tr> <tr><td></td><td></td></tr> <tr><td></td><td></td></tr> </table>                                                                                                          |  |  |  |  |  |  |
|                                                           |                                                                                                                                                                                |                                                                                                                                                                                                                                                                                                                                                                         |  |  |  |  |  |  |
|                                                           |                                                                                                                                                                                |                                                                                                                                                                                                                                                                                                                                                                         |  |  |  |  |  |  |
|                                                           |                                                                                                                                                                                |                                                                                                                                                                                                                                                                                                                                                                         |  |  |  |  |  |  |

|    |                                                                                                              | Name all entities with whom you have this relationship or indicate none (add rows as needed) | Specifications/Comments (e.g., if payments were made to you or to your institution) |
|----|--------------------------------------------------------------------------------------------------------------|----------------------------------------------------------------------------------------------|-------------------------------------------------------------------------------------|
| 4  | Consulting fees                                                                                              | <input type="checkbox"/> None                                                                |                                                                                     |
|    |                                                                                                              | Abbvie, Bayer, Gilead, Ipsen, Intercept and Roche                                            |                                                                                     |
|    |                                                                                                              |                                                                                              |                                                                                     |
|    |                                                                                                              |                                                                                              |                                                                                     |
| 5  | Payment or honoraria for lectures, presentations, speakers bureaus, manuscript writing or educational events | <input checked="" type="checkbox"/> None                                                     |                                                                                     |
|    |                                                                                                              |                                                                                              |                                                                                     |
|    |                                                                                                              |                                                                                              |                                                                                     |
|    |                                                                                                              |                                                                                              |                                                                                     |
| 6  | Payment for expert testimony                                                                                 | <input checked="" type="checkbox"/> None                                                     |                                                                                     |
|    |                                                                                                              |                                                                                              |                                                                                     |
|    |                                                                                                              |                                                                                              |                                                                                     |
|    |                                                                                                              |                                                                                              |                                                                                     |
| 7  | Support for attending meetings and/or travel                                                                 | <input checked="" type="checkbox"/> None                                                     |                                                                                     |
|    |                                                                                                              |                                                                                              |                                                                                     |
|    |                                                                                                              |                                                                                              |                                                                                     |
|    |                                                                                                              |                                                                                              |                                                                                     |
| 8  | Patents planned, issued or pending                                                                           | <input checked="" type="checkbox"/> None                                                     |                                                                                     |
|    |                                                                                                              |                                                                                              |                                                                                     |
|    |                                                                                                              |                                                                                              |                                                                                     |
|    |                                                                                                              |                                                                                              |                                                                                     |
| 9  | Participation on a Data Safety Monitoring Board or Advisory Board                                            | <input checked="" type="checkbox"/> None                                                     |                                                                                     |
|    |                                                                                                              |                                                                                              |                                                                                     |
|    |                                                                                                              |                                                                                              |                                                                                     |
|    |                                                                                                              |                                                                                              |                                                                                     |
| 10 | Leadership or fiduciary role in other board, society, committee or advocacy group, paid or unpaid            | <input checked="" type="checkbox"/> None                                                     |                                                                                     |
|    |                                                                                                              |                                                                                              |                                                                                     |
|    |                                                                                                              |                                                                                              |                                                                                     |
|    |                                                                                                              |                                                                                              |                                                                                     |

|           |                                                                                  | Name all entities with whom you have this relationship or indicate none (add rows as needed)                                                                                                                                                                                                                         | Specifications/Comments (e.g., if payments were made to you or to your institution) |  |  |  |  |  |  |
|-----------|----------------------------------------------------------------------------------|----------------------------------------------------------------------------------------------------------------------------------------------------------------------------------------------------------------------------------------------------------------------------------------------------------------------|-------------------------------------------------------------------------------------|--|--|--|--|--|--|
| <b>11</b> | Stock or stock options                                                           | <input checked="" type="checkbox"/> <b>None</b><br><table border="1" style="width: 100%; border-collapse: collapse;"> <tr><td style="width: 50%; height: 15px;"></td><td style="width: 50%;"></td></tr> <tr><td style="height: 15px;"></td><td></td></tr> <tr><td style="height: 15px;"></td><td></td></tr> </table> |                                                                                     |  |  |  |  |  |  |
|           |                                                                                  |                                                                                                                                                                                                                                                                                                                      |                                                                                     |  |  |  |  |  |  |
|           |                                                                                  |                                                                                                                                                                                                                                                                                                                      |                                                                                     |  |  |  |  |  |  |
|           |                                                                                  |                                                                                                                                                                                                                                                                                                                      |                                                                                     |  |  |  |  |  |  |
| <b>12</b> | Receipt of equipment, materials, drugs, medical writing, gifts or other services | <input checked="" type="checkbox"/> <b>None</b><br><table border="1" style="width: 100%; border-collapse: collapse;"> <tr><td style="width: 50%; height: 15px;"></td><td style="width: 50%;"></td></tr> <tr><td style="height: 15px;"></td><td></td></tr> <tr><td style="height: 15px;"></td><td></td></tr> </table> |                                                                                     |  |  |  |  |  |  |
|           |                                                                                  |                                                                                                                                                                                                                                                                                                                      |                                                                                     |  |  |  |  |  |  |
|           |                                                                                  |                                                                                                                                                                                                                                                                                                                      |                                                                                     |  |  |  |  |  |  |
|           |                                                                                  |                                                                                                                                                                                                                                                                                                                      |                                                                                     |  |  |  |  |  |  |
| <b>13</b> | Other financial or non-financial interests                                       | <input checked="" type="checkbox"/> <b>None</b><br><table border="1" style="width: 100%; border-collapse: collapse;"> <tr><td style="width: 50%; height: 15px;"></td><td style="width: 50%;"></td></tr> <tr><td style="height: 15px;"></td><td></td></tr> <tr><td style="height: 15px;"></td><td></td></tr> </table> |                                                                                     |  |  |  |  |  |  |
|           |                                                                                  |                                                                                                                                                                                                                                                                                                                      |                                                                                     |  |  |  |  |  |  |
|           |                                                                                  |                                                                                                                                                                                                                                                                                                                      |                                                                                     |  |  |  |  |  |  |
|           |                                                                                  |                                                                                                                                                                                                                                                                                                                      |                                                                                     |  |  |  |  |  |  |

**Please place an "X" next to the following statement to indicate your agreement:**

I certify that I have answered every question and have not altered the wording of any of the questions on this form.

## ICMJE DISCLOSURE FORM

**Date:** 8/7/2021

**Your Name:** Vincent Levy

**Manuscript Title:** Patient and physician expectation's regarding disease and treatment of advanced HCC: the prospective PERCEPTION1 study

**Manuscript Number (if known):** JHEPR-D-24-00819

In the interest of transparency, we ask you to disclose all relationships/activities/interests listed below that are related to the content of your manuscript. "Related" means any relation with for-profit or not-for-profit third parties whose interests may be affected by the content of the manuscript. Disclosure represents a commitment to transparency and does not necessarily indicate a bias. If you are in doubt about whether to list a relationship/activity/interest, it is preferable that you do so.

The author's relationships/activities/interests should be defined broadly. For example, if your manuscript pertains to the epidemiology of hypertension, you should declare all relationships with manufacturers of antihypertensive medication, even if that medication is not mentioned in the manuscript.

In item #1 below, report all support for the work reported in this manuscript without time limit. For all other items, the time frame for disclosure is the past 36 months.

|                                                    | Name all entities with whom you have this relationship or indicate none (add rows as needed)                                                                                   | Specifications/Comments (e.g., if payments were made to you or to your institution)                                                                                                                                                                                                                                                                       |  |  |  |  |  |  |
|----------------------------------------------------|--------------------------------------------------------------------------------------------------------------------------------------------------------------------------------|-----------------------------------------------------------------------------------------------------------------------------------------------------------------------------------------------------------------------------------------------------------------------------------------------------------------------------------------------------------|--|--|--|--|--|--|
| Time frame: Since the initial planning of the work |                                                                                                                                                                                |                                                                                                                                                                                                                                                                                                                                                           |  |  |  |  |  |  |
| <b>1</b>                                           | All support for the present manuscript (e.g., funding, provision of study materials, medical writing, article processing charges, etc.)<br><b>No time limit for this item.</b> | <input checked="" type="checkbox"/> <b>None</b><br><table border="1" style="width: 100%; height: 40px; margin-top: 5px;"> <tr><td style="width: 60%;"></td><td></td></tr> <tr><td></td><td></td></tr> <tr><td></td><td></td></tr> </table> <p style="font-size: small; text-align: right; margin-top: 5px;">Click the tab key to add additional rows.</p> |  |  |  |  |  |  |
|                                                    |                                                                                                                                                                                |                                                                                                                                                                                                                                                                                                                                                           |  |  |  |  |  |  |
|                                                    |                                                                                                                                                                                |                                                                                                                                                                                                                                                                                                                                                           |  |  |  |  |  |  |
|                                                    |                                                                                                                                                                                |                                                                                                                                                                                                                                                                                                                                                           |  |  |  |  |  |  |
| Time frame: past 36 months                         |                                                                                                                                                                                |                                                                                                                                                                                                                                                                                                                                                           |  |  |  |  |  |  |
| <b>2</b>                                           | Grants or contracts from any entity (if not indicated in item #1 above).                                                                                                       | <input checked="" type="checkbox"/> <b>None</b><br><table border="1" style="width: 100%; height: 40px; margin-top: 5px;"> <tr><td style="width: 60%;"></td><td></td></tr> <tr><td></td><td></td></tr> <tr><td></td><td></td></tr> </table>                                                                                                                |  |  |  |  |  |  |
|                                                    |                                                                                                                                                                                |                                                                                                                                                                                                                                                                                                                                                           |  |  |  |  |  |  |
|                                                    |                                                                                                                                                                                |                                                                                                                                                                                                                                                                                                                                                           |  |  |  |  |  |  |
|                                                    |                                                                                                                                                                                |                                                                                                                                                                                                                                                                                                                                                           |  |  |  |  |  |  |
| <b>3</b>                                           | Royalties or licenses                                                                                                                                                          | <input checked="" type="checkbox"/> <b>None</b><br><table border="1" style="width: 100%; height: 40px; margin-top: 5px;"> <tr><td style="width: 60%;"></td><td></td></tr> <tr><td></td><td></td></tr> <tr><td></td><td></td></tr> </table>                                                                                                                |  |  |  |  |  |  |
|                                                    |                                                                                                                                                                                |                                                                                                                                                                                                                                                                                                                                                           |  |  |  |  |  |  |
|                                                    |                                                                                                                                                                                |                                                                                                                                                                                                                                                                                                                                                           |  |  |  |  |  |  |
|                                                    |                                                                                                                                                                                |                                                                                                                                                                                                                                                                                                                                                           |  |  |  |  |  |  |

|           |                                                                                                              | Name all entities with whom you have this relationship or indicate none (add rows as needed)                                                                                                                                                                                                                                                                           | Specifications/Comments (e.g., if payments were made to you or to your institution) |  |  |  |  |  |  |  |  |
|-----------|--------------------------------------------------------------------------------------------------------------|------------------------------------------------------------------------------------------------------------------------------------------------------------------------------------------------------------------------------------------------------------------------------------------------------------------------------------------------------------------------|-------------------------------------------------------------------------------------|--|--|--|--|--|--|--|--|
| <b>4</b>  | Consulting fees                                                                                              | <input checked="" type="checkbox"/> <b>None</b><br><table border="1" style="width: 100%; border-collapse: collapse;"> <tr><td style="width: 50%; height: 15px;"></td><td style="width: 50%;"></td></tr> <tr><td style="height: 15px;"></td><td></td></tr> <tr><td style="height: 15px;"></td><td></td></tr> <tr><td style="height: 15px;"></td><td></td></tr> </table> |                                                                                     |  |  |  |  |  |  |  |  |
|           |                                                                                                              |                                                                                                                                                                                                                                                                                                                                                                        |                                                                                     |  |  |  |  |  |  |  |  |
|           |                                                                                                              |                                                                                                                                                                                                                                                                                                                                                                        |                                                                                     |  |  |  |  |  |  |  |  |
|           |                                                                                                              |                                                                                                                                                                                                                                                                                                                                                                        |                                                                                     |  |  |  |  |  |  |  |  |
|           |                                                                                                              |                                                                                                                                                                                                                                                                                                                                                                        |                                                                                     |  |  |  |  |  |  |  |  |
| <b>5</b>  | Payment or honoraria for lectures, presentations, speakers bureaus, manuscript writing or educational events | <input checked="" type="checkbox"/> <b>None</b><br><table border="1" style="width: 100%; border-collapse: collapse;"> <tr><td style="width: 50%; height: 15px;"></td><td style="width: 50%;"></td></tr> <tr><td style="height: 15px;"></td><td></td></tr> <tr><td style="height: 15px;"></td><td></td></tr> </table>                                                   |                                                                                     |  |  |  |  |  |  |  |  |
|           |                                                                                                              |                                                                                                                                                                                                                                                                                                                                                                        |                                                                                     |  |  |  |  |  |  |  |  |
|           |                                                                                                              |                                                                                                                                                                                                                                                                                                                                                                        |                                                                                     |  |  |  |  |  |  |  |  |
|           |                                                                                                              |                                                                                                                                                                                                                                                                                                                                                                        |                                                                                     |  |  |  |  |  |  |  |  |
| <b>6</b>  | Payment for expert testimony                                                                                 | <input checked="" type="checkbox"/> <b>None</b><br><table border="1" style="width: 100%; border-collapse: collapse;"> <tr><td style="width: 50%; height: 15px;"></td><td style="width: 50%;"></td></tr> <tr><td style="height: 15px;"></td><td></td></tr> <tr><td style="height: 15px;"></td><td></td></tr> </table>                                                   |                                                                                     |  |  |  |  |  |  |  |  |
|           |                                                                                                              |                                                                                                                                                                                                                                                                                                                                                                        |                                                                                     |  |  |  |  |  |  |  |  |
|           |                                                                                                              |                                                                                                                                                                                                                                                                                                                                                                        |                                                                                     |  |  |  |  |  |  |  |  |
|           |                                                                                                              |                                                                                                                                                                                                                                                                                                                                                                        |                                                                                     |  |  |  |  |  |  |  |  |
| <b>7</b>  | Support for attending meetings and/or travel                                                                 | <input checked="" type="checkbox"/> <b>None</b><br><table border="1" style="width: 100%; border-collapse: collapse;"> <tr><td style="width: 50%; height: 15px;"></td><td style="width: 50%;"></td></tr> <tr><td style="height: 15px;"></td><td></td></tr> <tr><td style="height: 15px;"></td><td></td></tr> </table>                                                   |                                                                                     |  |  |  |  |  |  |  |  |
|           |                                                                                                              |                                                                                                                                                                                                                                                                                                                                                                        |                                                                                     |  |  |  |  |  |  |  |  |
|           |                                                                                                              |                                                                                                                                                                                                                                                                                                                                                                        |                                                                                     |  |  |  |  |  |  |  |  |
|           |                                                                                                              |                                                                                                                                                                                                                                                                                                                                                                        |                                                                                     |  |  |  |  |  |  |  |  |
| <b>8</b>  | Patents planned, issued or pending                                                                           | <input checked="" type="checkbox"/> <b>None</b><br><table border="1" style="width: 100%; border-collapse: collapse;"> <tr><td style="width: 50%; height: 15px;"></td><td style="width: 50%;"></td></tr> <tr><td style="height: 15px;"></td><td></td></tr> <tr><td style="height: 15px;"></td><td></td></tr> </table>                                                   |                                                                                     |  |  |  |  |  |  |  |  |
|           |                                                                                                              |                                                                                                                                                                                                                                                                                                                                                                        |                                                                                     |  |  |  |  |  |  |  |  |
|           |                                                                                                              |                                                                                                                                                                                                                                                                                                                                                                        |                                                                                     |  |  |  |  |  |  |  |  |
|           |                                                                                                              |                                                                                                                                                                                                                                                                                                                                                                        |                                                                                     |  |  |  |  |  |  |  |  |
| <b>9</b>  | Participation on a Data Safety Monitoring Board or Advisory Board                                            | <input checked="" type="checkbox"/> <b>None</b><br><table border="1" style="width: 100%; border-collapse: collapse;"> <tr><td style="width: 50%; height: 15px;"></td><td style="width: 50%;"></td></tr> <tr><td style="height: 15px;"></td><td></td></tr> <tr><td style="height: 15px;"></td><td></td></tr> </table>                                                   |                                                                                     |  |  |  |  |  |  |  |  |
|           |                                                                                                              |                                                                                                                                                                                                                                                                                                                                                                        |                                                                                     |  |  |  |  |  |  |  |  |
|           |                                                                                                              |                                                                                                                                                                                                                                                                                                                                                                        |                                                                                     |  |  |  |  |  |  |  |  |
|           |                                                                                                              |                                                                                                                                                                                                                                                                                                                                                                        |                                                                                     |  |  |  |  |  |  |  |  |
| <b>10</b> | Leadership or fiduciary role in other board, society, committee or advocacy group, paid or unpaid            | <input checked="" type="checkbox"/> <b>None</b><br><table border="1" style="width: 100%; border-collapse: collapse;"> <tr><td style="width: 50%; height: 15px;"></td><td style="width: 50%;"></td></tr> <tr><td style="height: 15px;"></td><td></td></tr> <tr><td style="height: 15px;"></td><td></td></tr> </table>                                                   |                                                                                     |  |  |  |  |  |  |  |  |
|           |                                                                                                              |                                                                                                                                                                                                                                                                                                                                                                        |                                                                                     |  |  |  |  |  |  |  |  |
|           |                                                                                                              |                                                                                                                                                                                                                                                                                                                                                                        |                                                                                     |  |  |  |  |  |  |  |  |
|           |                                                                                                              |                                                                                                                                                                                                                                                                                                                                                                        |                                                                                     |  |  |  |  |  |  |  |  |



|           |                                                                                  | Name all entities with whom you have this relationship or indicate none (add rows as needed)                                                                                                                                                                                                                         | Specifications/Comments (e.g., if payments were made to you or to your institution) |  |  |  |  |  |  |
|-----------|----------------------------------------------------------------------------------|----------------------------------------------------------------------------------------------------------------------------------------------------------------------------------------------------------------------------------------------------------------------------------------------------------------------|-------------------------------------------------------------------------------------|--|--|--|--|--|--|
| <b>11</b> | Stock or stock options                                                           | <input checked="" type="checkbox"/> <b>None</b><br><table border="1" style="width: 100%; border-collapse: collapse;"> <tr><td style="width: 50%; height: 15px;"></td><td style="width: 50%;"></td></tr> <tr><td style="height: 15px;"></td><td></td></tr> <tr><td style="height: 15px;"></td><td></td></tr> </table> |                                                                                     |  |  |  |  |  |  |
|           |                                                                                  |                                                                                                                                                                                                                                                                                                                      |                                                                                     |  |  |  |  |  |  |
|           |                                                                                  |                                                                                                                                                                                                                                                                                                                      |                                                                                     |  |  |  |  |  |  |
|           |                                                                                  |                                                                                                                                                                                                                                                                                                                      |                                                                                     |  |  |  |  |  |  |
| <b>12</b> | Receipt of equipment, materials, drugs, medical writing, gifts or other services | <input checked="" type="checkbox"/> <b>None</b><br><table border="1" style="width: 100%; border-collapse: collapse;"> <tr><td style="width: 50%; height: 15px;"></td><td style="width: 50%;"></td></tr> <tr><td style="height: 15px;"></td><td></td></tr> <tr><td style="height: 15px;"></td><td></td></tr> </table> |                                                                                     |  |  |  |  |  |  |
|           |                                                                                  |                                                                                                                                                                                                                                                                                                                      |                                                                                     |  |  |  |  |  |  |
|           |                                                                                  |                                                                                                                                                                                                                                                                                                                      |                                                                                     |  |  |  |  |  |  |
|           |                                                                                  |                                                                                                                                                                                                                                                                                                                      |                                                                                     |  |  |  |  |  |  |
| <b>13</b> | Other financial or non-financial interests                                       | <input checked="" type="checkbox"/> <b>None</b><br><table border="1" style="width: 100%; border-collapse: collapse;"> <tr><td style="width: 50%; height: 15px;"></td><td style="width: 50%;"></td></tr> <tr><td style="height: 15px;"></td><td></td></tr> <tr><td style="height: 15px;"></td><td></td></tr> </table> |                                                                                     |  |  |  |  |  |  |
|           |                                                                                  |                                                                                                                                                                                                                                                                                                                      |                                                                                     |  |  |  |  |  |  |
|           |                                                                                  |                                                                                                                                                                                                                                                                                                                      |                                                                                     |  |  |  |  |  |  |
|           |                                                                                  |                                                                                                                                                                                                                                                                                                                      |                                                                                     |  |  |  |  |  |  |

**Please place an "X" next to the following statement to indicate your agreement:**

I certify that I have answered every question and have not altered the wording of any of the questions on this form.

## ICMJE DISCLOSURE FORM

**Date:** 8/7/2021

**Your Name:** Coralie Bloch-Queyrat

**Manuscript Title:** Patient and physician expectation's regarding disease and treatment of advanced HCC: the prospective PERCEPTION1 study

**Manuscript Number (if known):** JHEPR-D-24-00819

In the interest of transparency, we ask you to disclose all relationships/activities/interests listed below that are related to the content of your manuscript. "Related" means any relation with for-profit or not-for-profit third parties whose interests may be affected by the content of the manuscript. Disclosure represents a commitment to transparency and does not necessarily indicate a bias. If you are in doubt about whether to list a relationship/activity/interest, it is preferable that you do so.

The author's relationships/activities/interests should be defined broadly. For example, if your manuscript pertains to the epidemiology of hypertension, you should declare all relationships with manufacturers of antihypertensive medication, even if that medication is not mentioned in the manuscript.

In item #1 below, report all support for the work reported in this manuscript without time limit. For all other items, the time frame for disclosure is the past 36 months.

|                                                    | Name all entities with whom you have this relationship or indicate none (add rows as needed)                                                                                   | Specifications/Comments (e.g., if payments were made to you or to your institution)                                                                                                                                                                                                                                                                       |  |  |  |  |  |  |
|----------------------------------------------------|--------------------------------------------------------------------------------------------------------------------------------------------------------------------------------|-----------------------------------------------------------------------------------------------------------------------------------------------------------------------------------------------------------------------------------------------------------------------------------------------------------------------------------------------------------|--|--|--|--|--|--|
| Time frame: Since the initial planning of the work |                                                                                                                                                                                |                                                                                                                                                                                                                                                                                                                                                           |  |  |  |  |  |  |
| <b>1</b>                                           | All support for the present manuscript (e.g., funding, provision of study materials, medical writing, article processing charges, etc.)<br><b>No time limit for this item.</b> | <input checked="" type="checkbox"/> <b>None</b><br><table border="1" style="width: 100%; height: 40px; margin-top: 5px;"> <tr><td style="width: 60%;"></td><td></td></tr> <tr><td></td><td></td></tr> <tr><td></td><td></td></tr> </table> <p style="font-size: small; text-align: right; margin-top: 5px;">Click the tab key to add additional rows.</p> |  |  |  |  |  |  |
|                                                    |                                                                                                                                                                                |                                                                                                                                                                                                                                                                                                                                                           |  |  |  |  |  |  |
|                                                    |                                                                                                                                                                                |                                                                                                                                                                                                                                                                                                                                                           |  |  |  |  |  |  |
|                                                    |                                                                                                                                                                                |                                                                                                                                                                                                                                                                                                                                                           |  |  |  |  |  |  |
| Time frame: past 36 months                         |                                                                                                                                                                                |                                                                                                                                                                                                                                                                                                                                                           |  |  |  |  |  |  |
| <b>2</b>                                           | Grants or contracts from any entity (if not indicated in item #1 above).                                                                                                       | <input checked="" type="checkbox"/> <b>None</b><br><table border="1" style="width: 100%; height: 40px; margin-top: 5px;"> <tr><td style="width: 60%;"></td><td></td></tr> <tr><td></td><td></td></tr> <tr><td></td><td></td></tr> </table>                                                                                                                |  |  |  |  |  |  |
|                                                    |                                                                                                                                                                                |                                                                                                                                                                                                                                                                                                                                                           |  |  |  |  |  |  |
|                                                    |                                                                                                                                                                                |                                                                                                                                                                                                                                                                                                                                                           |  |  |  |  |  |  |
|                                                    |                                                                                                                                                                                |                                                                                                                                                                                                                                                                                                                                                           |  |  |  |  |  |  |
| <b>3</b>                                           | Royalties or licenses                                                                                                                                                          | <input checked="" type="checkbox"/> <b>None</b><br><table border="1" style="width: 100%; height: 40px; margin-top: 5px;"> <tr><td style="width: 60%;"></td><td></td></tr> <tr><td></td><td></td></tr> <tr><td></td><td></td></tr> </table>                                                                                                                |  |  |  |  |  |  |
|                                                    |                                                                                                                                                                                |                                                                                                                                                                                                                                                                                                                                                           |  |  |  |  |  |  |
|                                                    |                                                                                                                                                                                |                                                                                                                                                                                                                                                                                                                                                           |  |  |  |  |  |  |
|                                                    |                                                                                                                                                                                |                                                                                                                                                                                                                                                                                                                                                           |  |  |  |  |  |  |

|    |                                                                                                              | Name all entities with whom you have this relationship or indicate none (add rows as needed)                                                                                                                                                                                                                                                                           | Specifications/Comments (e.g., if payments were made to you or to your institution) |  |  |  |  |  |  |  |  |
|----|--------------------------------------------------------------------------------------------------------------|------------------------------------------------------------------------------------------------------------------------------------------------------------------------------------------------------------------------------------------------------------------------------------------------------------------------------------------------------------------------|-------------------------------------------------------------------------------------|--|--|--|--|--|--|--|--|
| 4  | Consulting fees                                                                                              | <input checked="" type="checkbox"/> <b>None</b><br><table border="1" style="width: 100%; border-collapse: collapse;"> <tr><td style="width: 50%; height: 15px;"></td><td style="width: 50%;"></td></tr> <tr><td style="height: 15px;"></td><td></td></tr> <tr><td style="height: 15px;"></td><td></td></tr> <tr><td style="height: 15px;"></td><td></td></tr> </table> |                                                                                     |  |  |  |  |  |  |  |  |
|    |                                                                                                              |                                                                                                                                                                                                                                                                                                                                                                        |                                                                                     |  |  |  |  |  |  |  |  |
|    |                                                                                                              |                                                                                                                                                                                                                                                                                                                                                                        |                                                                                     |  |  |  |  |  |  |  |  |
|    |                                                                                                              |                                                                                                                                                                                                                                                                                                                                                                        |                                                                                     |  |  |  |  |  |  |  |  |
|    |                                                                                                              |                                                                                                                                                                                                                                                                                                                                                                        |                                                                                     |  |  |  |  |  |  |  |  |
| 5  | Payment or honoraria for lectures, presentations, speakers bureaus, manuscript writing or educational events | <input checked="" type="checkbox"/> <b>None</b><br><table border="1" style="width: 100%; border-collapse: collapse;"> <tr><td style="width: 50%; height: 15px;"></td><td style="width: 50%;"></td></tr> <tr><td style="height: 15px;"></td><td></td></tr> <tr><td style="height: 15px;"></td><td></td></tr> </table>                                                   |                                                                                     |  |  |  |  |  |  |  |  |
|    |                                                                                                              |                                                                                                                                                                                                                                                                                                                                                                        |                                                                                     |  |  |  |  |  |  |  |  |
|    |                                                                                                              |                                                                                                                                                                                                                                                                                                                                                                        |                                                                                     |  |  |  |  |  |  |  |  |
|    |                                                                                                              |                                                                                                                                                                                                                                                                                                                                                                        |                                                                                     |  |  |  |  |  |  |  |  |
| 6  | Payment for expert testimony                                                                                 | <input checked="" type="checkbox"/> <b>None</b><br><table border="1" style="width: 100%; border-collapse: collapse;"> <tr><td style="width: 50%; height: 15px;"></td><td style="width: 50%;"></td></tr> <tr><td style="height: 15px;"></td><td></td></tr> <tr><td style="height: 15px;"></td><td></td></tr> </table>                                                   |                                                                                     |  |  |  |  |  |  |  |  |
|    |                                                                                                              |                                                                                                                                                                                                                                                                                                                                                                        |                                                                                     |  |  |  |  |  |  |  |  |
|    |                                                                                                              |                                                                                                                                                                                                                                                                                                                                                                        |                                                                                     |  |  |  |  |  |  |  |  |
|    |                                                                                                              |                                                                                                                                                                                                                                                                                                                                                                        |                                                                                     |  |  |  |  |  |  |  |  |
| 7  | Support for attending meetings and/or travel                                                                 | <input checked="" type="checkbox"/> <b>None</b><br><table border="1" style="width: 100%; border-collapse: collapse;"> <tr><td style="width: 50%; height: 15px;"></td><td style="width: 50%;"></td></tr> <tr><td style="height: 15px;"></td><td></td></tr> <tr><td style="height: 15px;"></td><td></td></tr> </table>                                                   |                                                                                     |  |  |  |  |  |  |  |  |
|    |                                                                                                              |                                                                                                                                                                                                                                                                                                                                                                        |                                                                                     |  |  |  |  |  |  |  |  |
|    |                                                                                                              |                                                                                                                                                                                                                                                                                                                                                                        |                                                                                     |  |  |  |  |  |  |  |  |
|    |                                                                                                              |                                                                                                                                                                                                                                                                                                                                                                        |                                                                                     |  |  |  |  |  |  |  |  |
| 8  | Patents planned, issued or pending                                                                           | <input checked="" type="checkbox"/> <b>None</b><br><table border="1" style="width: 100%; border-collapse: collapse;"> <tr><td style="width: 50%; height: 15px;"></td><td style="width: 50%;"></td></tr> <tr><td style="height: 15px;"></td><td></td></tr> <tr><td style="height: 15px;"></td><td></td></tr> </table>                                                   |                                                                                     |  |  |  |  |  |  |  |  |
|    |                                                                                                              |                                                                                                                                                                                                                                                                                                                                                                        |                                                                                     |  |  |  |  |  |  |  |  |
|    |                                                                                                              |                                                                                                                                                                                                                                                                                                                                                                        |                                                                                     |  |  |  |  |  |  |  |  |
|    |                                                                                                              |                                                                                                                                                                                                                                                                                                                                                                        |                                                                                     |  |  |  |  |  |  |  |  |
| 9  | Participation on a Data Safety Monitoring Board or Advisory Board                                            | <input checked="" type="checkbox"/> <b>None</b><br><table border="1" style="width: 100%; border-collapse: collapse;"> <tr><td style="width: 50%; height: 15px;"></td><td style="width: 50%;"></td></tr> <tr><td style="height: 15px;"></td><td></td></tr> <tr><td style="height: 15px;"></td><td></td></tr> </table>                                                   |                                                                                     |  |  |  |  |  |  |  |  |
|    |                                                                                                              |                                                                                                                                                                                                                                                                                                                                                                        |                                                                                     |  |  |  |  |  |  |  |  |
|    |                                                                                                              |                                                                                                                                                                                                                                                                                                                                                                        |                                                                                     |  |  |  |  |  |  |  |  |
|    |                                                                                                              |                                                                                                                                                                                                                                                                                                                                                                        |                                                                                     |  |  |  |  |  |  |  |  |
| 10 | Leadership or fiduciary role in other board, society, committee or advocacy group, paid or unpaid            | <input checked="" type="checkbox"/> <b>None</b><br><table border="1" style="width: 100%; border-collapse: collapse;"> <tr><td style="width: 50%; height: 15px;"></td><td style="width: 50%;"></td></tr> <tr><td style="height: 15px;"></td><td></td></tr> <tr><td style="height: 15px;"></td><td></td></tr> </table>                                                   |                                                                                     |  |  |  |  |  |  |  |  |
|    |                                                                                                              |                                                                                                                                                                                                                                                                                                                                                                        |                                                                                     |  |  |  |  |  |  |  |  |
|    |                                                                                                              |                                                                                                                                                                                                                                                                                                                                                                        |                                                                                     |  |  |  |  |  |  |  |  |
|    |                                                                                                              |                                                                                                                                                                                                                                                                                                                                                                        |                                                                                     |  |  |  |  |  |  |  |  |

|           |                                                                                  | Name all entities with whom you have this relationship or indicate none (add rows as needed)                                                                                                                                                                                                                         | Specifications/Comments (e.g., if payments were made to you or to your institution) |  |  |  |  |  |  |
|-----------|----------------------------------------------------------------------------------|----------------------------------------------------------------------------------------------------------------------------------------------------------------------------------------------------------------------------------------------------------------------------------------------------------------------|-------------------------------------------------------------------------------------|--|--|--|--|--|--|
| <b>11</b> | Stock or stock options                                                           | <input checked="" type="checkbox"/> <b>None</b><br><table border="1" style="width: 100%; border-collapse: collapse;"> <tr><td style="width: 50%; height: 15px;"></td><td style="width: 50%;"></td></tr> <tr><td style="height: 15px;"></td><td></td></tr> <tr><td style="height: 15px;"></td><td></td></tr> </table> |                                                                                     |  |  |  |  |  |  |
|           |                                                                                  |                                                                                                                                                                                                                                                                                                                      |                                                                                     |  |  |  |  |  |  |
|           |                                                                                  |                                                                                                                                                                                                                                                                                                                      |                                                                                     |  |  |  |  |  |  |
|           |                                                                                  |                                                                                                                                                                                                                                                                                                                      |                                                                                     |  |  |  |  |  |  |
| <b>12</b> | Receipt of equipment, materials, drugs, medical writing, gifts or other services | <input checked="" type="checkbox"/> <b>None</b><br><table border="1" style="width: 100%; border-collapse: collapse;"> <tr><td style="width: 50%; height: 15px;"></td><td style="width: 50%;"></td></tr> <tr><td style="height: 15px;"></td><td></td></tr> <tr><td style="height: 15px;"></td><td></td></tr> </table> |                                                                                     |  |  |  |  |  |  |
|           |                                                                                  |                                                                                                                                                                                                                                                                                                                      |                                                                                     |  |  |  |  |  |  |
|           |                                                                                  |                                                                                                                                                                                                                                                                                                                      |                                                                                     |  |  |  |  |  |  |
|           |                                                                                  |                                                                                                                                                                                                                                                                                                                      |                                                                                     |  |  |  |  |  |  |
| <b>13</b> | Other financial or non-financial interests                                       | <input checked="" type="checkbox"/> <b>None</b><br><table border="1" style="width: 100%; border-collapse: collapse;"> <tr><td style="width: 50%; height: 15px;"></td><td style="width: 50%;"></td></tr> <tr><td style="height: 15px;"></td><td></td></tr> <tr><td style="height: 15px;"></td><td></td></tr> </table> |                                                                                     |  |  |  |  |  |  |
|           |                                                                                  |                                                                                                                                                                                                                                                                                                                      |                                                                                     |  |  |  |  |  |  |
|           |                                                                                  |                                                                                                                                                                                                                                                                                                                      |                                                                                     |  |  |  |  |  |  |
|           |                                                                                  |                                                                                                                                                                                                                                                                                                                      |                                                                                     |  |  |  |  |  |  |

**Please place an "X" next to the following statement to indicate your agreement:**

I certify that I have answered every question and have not altered the wording of any of the questions on this form.

# ICMJE DISCLOSURE FORM

**Date:** 9/8/2024

**Your Name:** Eric Trépo

**Manuscript Title:** Patient and physician expectation's regarding disease and treatment of advanced HCC: the prospective PERCEPTION1 study

**Manuscript Number (if known):** JHEPR-D-24-00819

In the interest of transparency, we ask you to disclose all relationships/activities/interests listed below that are related to the content of your manuscript. "Related" means any relation with for-profit or not-for-profit third parties whose interests may be affected by the content of the manuscript. Disclosure represents a commitment to transparency and does not necessarily indicate a bias. If you are in doubt about whether to list a relationship/activity/interest, it is preferable that you do so.

The author's relationships/activities/interests should be defined broadly. For example, if your manuscript pertains to the epidemiology of hypertension, you should declare all relationships with manufacturers of antihypertensive medication, even if that medication is not mentioned in the manuscript.

In item #1 below, report all support for the work reported in this manuscript without time limit. For all other items, the time frame for disclosure is the past 36 months.

|                                                    | Name all entities with whom you have this relationship or indicate none (add rows as needed)                                                                            | Specifications/Comments (e.g., if payments were made to you or to your institution)                                                                                                                                                                                                                                                                                                                                                                  |        |  |  |  |  |  |
|----------------------------------------------------|-------------------------------------------------------------------------------------------------------------------------------------------------------------------------|------------------------------------------------------------------------------------------------------------------------------------------------------------------------------------------------------------------------------------------------------------------------------------------------------------------------------------------------------------------------------------------------------------------------------------------------------|--------|--|--|--|--|--|
| Time frame: Since the initial planning of the work |                                                                                                                                                                         |                                                                                                                                                                                                                                                                                                                                                                                                                                                      |        |  |  |  |  |  |
| 1                                                  | All support for the present manuscript (e.g., funding, provision of study materials, medical writing, article processing charges, etc.)<br>No time limit for this item. | <input checked="" type="checkbox"/> None<br><br><table border="1" style="width: 100%; border-collapse: collapse;"> <tr><td style="height: 20px;"> </td><td style="width: 50px;"> </td></tr> <tr><td style="height: 20px;"> </td><td style="width: 50px;"> </td></tr> <tr><td style="height: 20px;"> </td><td style="width: 50px;"> </td></tr> </table> <p style="font-size: small; text-align: right;">Click the tab key to add additional rows.</p> |        |  |  |  |  |  |
|                                                    |                                                                                                                                                                         |                                                                                                                                                                                                                                                                                                                                                                                                                                                      |        |  |  |  |  |  |
|                                                    |                                                                                                                                                                         |                                                                                                                                                                                                                                                                                                                                                                                                                                                      |        |  |  |  |  |  |
|                                                    |                                                                                                                                                                         |                                                                                                                                                                                                                                                                                                                                                                                                                                                      |        |  |  |  |  |  |
| Time frame: past 36 months                         |                                                                                                                                                                         |                                                                                                                                                                                                                                                                                                                                                                                                                                                      |        |  |  |  |  |  |
| 2                                                  | Grants or contracts from any entity (if not indicated in                                                                                                                | <input type="checkbox"/> <b>No</b><br><input type="checkbox"/> <b>ne</b><br><table border="1" style="width: 100%; border-collapse: collapse;"> <tr><td style="width: 50%;">Gilead</td><td style="width: 50%;"> </td></tr> </table>                                                                                                                                                                                                                   | Gilead |  |  |  |  |  |
| Gilead                                             |                                                                                                                                                                         |                                                                                                                                                                                                                                                                                                                                                                                                                                                      |        |  |  |  |  |  |

|          |                       |                                               |  |
|----------|-----------------------|-----------------------------------------------|--|
|          | item #1 above).       |                                               |  |
| <b>3</b> | Royalties or licenses | <input checked="" type="checkbox"/> <b>No</b> |  |
|          |                       |                                               |  |
|          |                       |                                               |  |

|          |                                                                                                              | Name all entities with whom you have this relationship or indicate none (add rows as needed) | Specifications/Comments (e.g., if payments were made to you or to your institution) |
|----------|--------------------------------------------------------------------------------------------------------------|----------------------------------------------------------------------------------------------|-------------------------------------------------------------------------------------|
| <b>4</b> | Consulting fees                                                                                              | <input checked="" type="checkbox"/> <b>None</b>                                              |                                                                                     |
|          |                                                                                                              |                                                                                              |                                                                                     |
|          |                                                                                                              |                                                                                              |                                                                                     |
|          |                                                                                                              |                                                                                              |                                                                                     |
| <b>5</b> | Payment or honoraria for lectures, presentations, speakers bureaus, manuscript writing or educational events | <input type="checkbox"/> <b>None</b>                                                         |                                                                                     |
|          |                                                                                                              | lead                                                                                         |                                                                                     |
|          |                                                                                                              | Gi                                                                                           |                                                                                     |
|          |                                                                                                              |                                                                                              |                                                                                     |
|          |                                                                                                              |                                                                                              |                                                                                     |
| <b>6</b> | Payment for expert testimony                                                                                 | <input checked="" type="checkbox"/> <b>None</b>                                              |                                                                                     |
|          |                                                                                                              |                                                                                              |                                                                                     |
|          |                                                                                                              |                                                                                              |                                                                                     |
| <b>7</b> | Support for attending meetings and/or travel                                                                 | <input checked="" type="checkbox"/> <b>None</b>                                              |                                                                                     |
|          |                                                                                                              |                                                                                              |                                                                                     |
|          |                                                                                                              |                                                                                              |                                                                                     |
|          |                                                                                                              |                                                                                              |                                                                                     |

|    |                                                                                                   |                                                                                                                                                                                                                               |                                                                                            |  |  |  |  |  |  |  |  |
|----|---------------------------------------------------------------------------------------------------|-------------------------------------------------------------------------------------------------------------------------------------------------------------------------------------------------------------------------------|--------------------------------------------------------------------------------------------|--|--|--|--|--|--|--|--|
| 8  | Patents planned, issued or pending                                                                | <input checked="" type="checkbox"/> <b>None</b><br><table border="1" data-bbox="370 142 1502 296"> <tr><td></td><td></td></tr> <tr><td></td><td></td></tr> <tr><td></td><td></td></tr> </table>                               |                                                                                            |  |  |  |  |  |  |  |  |
|    |                                                                                                   |                                                                                                                                                                                                                               |                                                                                            |  |  |  |  |  |  |  |  |
|    |                                                                                                   |                                                                                                                                                                                                                               |                                                                                            |  |  |  |  |  |  |  |  |
|    |                                                                                                   |                                                                                                                                                                                                                               |                                                                                            |  |  |  |  |  |  |  |  |
| 9  | Participation on a Data Safety Monitoring Board or Advisory Board                                 | <input checked="" type="checkbox"/> <b>None</b><br><table border="1" data-bbox="370 407 1502 617"> <tr><td></td><td></td></tr> <tr><td></td><td></td></tr> <tr><td></td><td></td></tr> </table>                               |                                                                                            |  |  |  |  |  |  |  |  |
|    |                                                                                                   |                                                                                                                                                                                                                               |                                                                                            |  |  |  |  |  |  |  |  |
|    |                                                                                                   |                                                                                                                                                                                                                               |                                                                                            |  |  |  |  |  |  |  |  |
|    |                                                                                                   |                                                                                                                                                                                                                               |                                                                                            |  |  |  |  |  |  |  |  |
| 10 | Leadership or fiduciary role in other board, society, committee or advocacy group, paid or unpaid | <input checked="" type="checkbox"/> <b>None</b><br><table border="1" data-bbox="370 667 1502 821"> <tr><td></td><td></td></tr> <tr><td></td><td></td></tr> <tr><td></td><td></td></tr> </table>                               |                                                                                            |  |  |  |  |  |  |  |  |
|    |                                                                                                   |                                                                                                                                                                                                                               |                                                                                            |  |  |  |  |  |  |  |  |
|    |                                                                                                   |                                                                                                                                                                                                                               |                                                                                            |  |  |  |  |  |  |  |  |
|    |                                                                                                   |                                                                                                                                                                                                                               |                                                                                            |  |  |  |  |  |  |  |  |
|    |                                                                                                   | <b>Name all entities with whom you have this relationship or indicate none (add rows as needed)</b>                                                                                                                           | <b>Specifications/Comments (e.g., if payments were made to you or to your institution)</b> |  |  |  |  |  |  |  |  |
| 11 | Stock or stock options                                                                            | <input checked="" type="checkbox"/> <b>None</b><br><table border="1" data-bbox="370 1150 1502 1360"> <tr><td></td><td></td></tr> <tr><td></td><td></td></tr> <tr><td></td><td></td></tr> <tr><td></td><td></td></tr> </table> |                                                                                            |  |  |  |  |  |  |  |  |
|    |                                                                                                   |                                                                                                                                                                                                                               |                                                                                            |  |  |  |  |  |  |  |  |
|    |                                                                                                   |                                                                                                                                                                                                                               |                                                                                            |  |  |  |  |  |  |  |  |
|    |                                                                                                   |                                                                                                                                                                                                                               |                                                                                            |  |  |  |  |  |  |  |  |
|    |                                                                                                   |                                                                                                                                                                                                                               |                                                                                            |  |  |  |  |  |  |  |  |
| 12 | Receipt of equipment, materials, drugs, medical writing, gifts or other services                  | <input checked="" type="checkbox"/> <b>None</b><br><table border="1" data-bbox="370 1436 1502 1589"> <tr><td></td><td></td></tr> <tr><td></td><td></td></tr> <tr><td></td><td></td></tr> </table>                             |                                                                                            |  |  |  |  |  |  |  |  |
|    |                                                                                                   |                                                                                                                                                                                                                               |                                                                                            |  |  |  |  |  |  |  |  |
|    |                                                                                                   |                                                                                                                                                                                                                               |                                                                                            |  |  |  |  |  |  |  |  |
|    |                                                                                                   |                                                                                                                                                                                                                               |                                                                                            |  |  |  |  |  |  |  |  |
| 13 | Other financial or non-financial interests                                                        | <input checked="" type="checkbox"/> <b>None</b><br><table border="1" data-bbox="370 1738 1502 1871"> <tr><td></td><td></td></tr> <tr><td></td><td></td></tr> <tr><td></td><td></td></tr> </table>                             |                                                                                            |  |  |  |  |  |  |  |  |
|    |                                                                                                   |                                                                                                                                                                                                                               |                                                                                            |  |  |  |  |  |  |  |  |
|    |                                                                                                   |                                                                                                                                                                                                                               |                                                                                            |  |  |  |  |  |  |  |  |
|    |                                                                                                   |                                                                                                                                                                                                                               |                                                                                            |  |  |  |  |  |  |  |  |

**Please place an "X" next to the following statement to indicate your agreement:**

I certify that I have answered every question and have not altered the wording of any of the questions on this form.



## ICMJE DISCLOSURE FORM

**Date:** 8/7/2021

**Your Name:** Mohamed BOUATTOUR

**Manuscript Title:** Patient and physician expectation's regarding disease and treatment of advanced HCC: the prospective PERCEPTION1 study

**Manuscript Number (if known):** JHEPR-D-24-00819

In the interest of transparency, we ask you to disclose all relationships/activities/interests listed below that are related to the content of your manuscript. "Related" means any relation with for-profit or not-for-profit third parties whose interests may be affected by the content of the manuscript. Disclosure represents a commitment to transparency and does not necessarily indicate a bias. If you are in doubt about whether to list a relationship/activity/interest, it is preferable that you do so.

The author's relationships/activities/interests should be defined broadly. For example, if your manuscript pertains to the epidemiology of hypertension, you should declare all relationships with manufacturers of antihypertensive medication, even if that medication is not mentioned in the manuscript.

In item #1 below, report all support for the work reported in this manuscript without time limit. For all other items, the time frame for disclosure is the past 36 months.

|                                                    | Name all entities with whom you have this relationship or indicate none (add rows as needed)                                                                                   | Specifications/Comments (e.g., if payments were made to you or to your institution)                                                                                                                                                                                                                                                                                           |  |  |  |  |  |  |
|----------------------------------------------------|--------------------------------------------------------------------------------------------------------------------------------------------------------------------------------|-------------------------------------------------------------------------------------------------------------------------------------------------------------------------------------------------------------------------------------------------------------------------------------------------------------------------------------------------------------------------------|--|--|--|--|--|--|
| Time frame: Since the initial planning of the work |                                                                                                                                                                                |                                                                                                                                                                                                                                                                                                                                                                               |  |  |  |  |  |  |
| <b>1</b>                                           | All support for the present manuscript (e.g., funding, provision of study materials, medical writing, article processing charges, etc.)<br><b>No time limit for this item.</b> | <input checked="" type="checkbox"/> <b>None</b><br><table border="1" style="width: 100%; height: 40px; margin-top: 5px;"> <tr><td style="width: 60%;"></td><td style="width: 40%;"></td></tr> <tr><td></td><td></td></tr> <tr><td></td><td></td></tr> </table> <p style="font-size: small; text-align: right; margin-top: 5px;">Click the tab key to add additional rows.</p> |  |  |  |  |  |  |
|                                                    |                                                                                                                                                                                |                                                                                                                                                                                                                                                                                                                                                                               |  |  |  |  |  |  |
|                                                    |                                                                                                                                                                                |                                                                                                                                                                                                                                                                                                                                                                               |  |  |  |  |  |  |
|                                                    |                                                                                                                                                                                |                                                                                                                                                                                                                                                                                                                                                                               |  |  |  |  |  |  |
| Time frame: past 36 months                         |                                                                                                                                                                                |                                                                                                                                                                                                                                                                                                                                                                               |  |  |  |  |  |  |
| <b>2</b>                                           | Grants or contracts from any entity (if not indicated in item #1 above).                                                                                                       | <input checked="" type="checkbox"/> <b>None</b><br><table border="1" style="width: 100%; height: 40px; margin-top: 5px;"> <tr><td style="width: 60%;"></td><td style="width: 40%;"></td></tr> <tr><td></td><td></td></tr> <tr><td></td><td></td></tr> </table>                                                                                                                |  |  |  |  |  |  |
|                                                    |                                                                                                                                                                                |                                                                                                                                                                                                                                                                                                                                                                               |  |  |  |  |  |  |
|                                                    |                                                                                                                                                                                |                                                                                                                                                                                                                                                                                                                                                                               |  |  |  |  |  |  |
|                                                    |                                                                                                                                                                                |                                                                                                                                                                                                                                                                                                                                                                               |  |  |  |  |  |  |
| <b>3</b>                                           | Royalties or licenses                                                                                                                                                          | <input checked="" type="checkbox"/> <b>None</b><br><table border="1" style="width: 100%; height: 40px; margin-top: 5px;"> <tr><td style="width: 60%;"></td><td style="width: 40%;"></td></tr> <tr><td></td><td></td></tr> <tr><td></td><td></td></tr> </table>                                                                                                                |  |  |  |  |  |  |
|                                                    |                                                                                                                                                                                |                                                                                                                                                                                                                                                                                                                                                                               |  |  |  |  |  |  |
|                                                    |                                                                                                                                                                                |                                                                                                                                                                                                                                                                                                                                                                               |  |  |  |  |  |  |
|                                                    |                                                                                                                                                                                |                                                                                                                                                                                                                                                                                                                                                                               |  |  |  |  |  |  |

|    |                                                                                                              | Name all entities with whom you have this relationship or indicate none (add rows as needed)                                                                                                                                                                                                                                                                           | Specifications/Comments (e.g., if payments were made to you or to your institution) |  |  |  |  |  |  |  |  |
|----|--------------------------------------------------------------------------------------------------------------|------------------------------------------------------------------------------------------------------------------------------------------------------------------------------------------------------------------------------------------------------------------------------------------------------------------------------------------------------------------------|-------------------------------------------------------------------------------------|--|--|--|--|--|--|--|--|
| 4  | Consulting fees                                                                                              | <input checked="" type="checkbox"/> <b>None</b><br><table border="1" style="width: 100%; border-collapse: collapse;"> <tr><td style="width: 50%; height: 15px;"></td><td style="width: 50%;"></td></tr> <tr><td style="height: 15px;"></td><td></td></tr> <tr><td style="height: 15px;"></td><td></td></tr> <tr><td style="height: 15px;"></td><td></td></tr> </table> |                                                                                     |  |  |  |  |  |  |  |  |
|    |                                                                                                              |                                                                                                                                                                                                                                                                                                                                                                        |                                                                                     |  |  |  |  |  |  |  |  |
|    |                                                                                                              |                                                                                                                                                                                                                                                                                                                                                                        |                                                                                     |  |  |  |  |  |  |  |  |
|    |                                                                                                              |                                                                                                                                                                                                                                                                                                                                                                        |                                                                                     |  |  |  |  |  |  |  |  |
|    |                                                                                                              |                                                                                                                                                                                                                                                                                                                                                                        |                                                                                     |  |  |  |  |  |  |  |  |
| 5  | Payment or honoraria for lectures, presentations, speakers bureaus, manuscript writing or educational events | <input checked="" type="checkbox"/> <b>None</b><br><table border="1" style="width: 100%; border-collapse: collapse;"> <tr><td style="width: 50%; height: 15px;"></td><td style="width: 50%;"></td></tr> <tr><td style="height: 15px;"></td><td></td></tr> <tr><td style="height: 15px;"></td><td></td></tr> </table>                                                   |                                                                                     |  |  |  |  |  |  |  |  |
|    |                                                                                                              |                                                                                                                                                                                                                                                                                                                                                                        |                                                                                     |  |  |  |  |  |  |  |  |
|    |                                                                                                              |                                                                                                                                                                                                                                                                                                                                                                        |                                                                                     |  |  |  |  |  |  |  |  |
|    |                                                                                                              |                                                                                                                                                                                                                                                                                                                                                                        |                                                                                     |  |  |  |  |  |  |  |  |
| 6  | Payment for expert testimony                                                                                 | <input checked="" type="checkbox"/> <b>None</b><br><table border="1" style="width: 100%; border-collapse: collapse;"> <tr><td style="width: 50%; height: 15px;"></td><td style="width: 50%;"></td></tr> <tr><td style="height: 15px;"></td><td></td></tr> <tr><td style="height: 15px;"></td><td></td></tr> </table>                                                   |                                                                                     |  |  |  |  |  |  |  |  |
|    |                                                                                                              |                                                                                                                                                                                                                                                                                                                                                                        |                                                                                     |  |  |  |  |  |  |  |  |
|    |                                                                                                              |                                                                                                                                                                                                                                                                                                                                                                        |                                                                                     |  |  |  |  |  |  |  |  |
|    |                                                                                                              |                                                                                                                                                                                                                                                                                                                                                                        |                                                                                     |  |  |  |  |  |  |  |  |
| 7  | Support for attending meetings and/or travel                                                                 | <input checked="" type="checkbox"/> <b>None</b><br><table border="1" style="width: 100%; border-collapse: collapse;"> <tr><td style="width: 50%; height: 15px;"></td><td style="width: 50%;"></td></tr> <tr><td style="height: 15px;"></td><td></td></tr> <tr><td style="height: 15px;"></td><td></td></tr> </table>                                                   |                                                                                     |  |  |  |  |  |  |  |  |
|    |                                                                                                              |                                                                                                                                                                                                                                                                                                                                                                        |                                                                                     |  |  |  |  |  |  |  |  |
|    |                                                                                                              |                                                                                                                                                                                                                                                                                                                                                                        |                                                                                     |  |  |  |  |  |  |  |  |
|    |                                                                                                              |                                                                                                                                                                                                                                                                                                                                                                        |                                                                                     |  |  |  |  |  |  |  |  |
| 8  | Patents planned, issued or pending                                                                           | <input checked="" type="checkbox"/> <b>None</b><br><table border="1" style="width: 100%; border-collapse: collapse;"> <tr><td style="width: 50%; height: 15px;"></td><td style="width: 50%;"></td></tr> <tr><td style="height: 15px;"></td><td></td></tr> <tr><td style="height: 15px;"></td><td></td></tr> </table>                                                   |                                                                                     |  |  |  |  |  |  |  |  |
|    |                                                                                                              |                                                                                                                                                                                                                                                                                                                                                                        |                                                                                     |  |  |  |  |  |  |  |  |
|    |                                                                                                              |                                                                                                                                                                                                                                                                                                                                                                        |                                                                                     |  |  |  |  |  |  |  |  |
|    |                                                                                                              |                                                                                                                                                                                                                                                                                                                                                                        |                                                                                     |  |  |  |  |  |  |  |  |
| 9  | Participation on a Data Safety Monitoring Board or Advisory Board                                            | <input checked="" type="checkbox"/> <b>None</b><br><table border="1" style="width: 100%; border-collapse: collapse;"> <tr><td style="width: 50%; height: 15px;"></td><td style="width: 50%;"></td></tr> <tr><td style="height: 15px;"></td><td></td></tr> <tr><td style="height: 15px;"></td><td></td></tr> </table>                                                   |                                                                                     |  |  |  |  |  |  |  |  |
|    |                                                                                                              |                                                                                                                                                                                                                                                                                                                                                                        |                                                                                     |  |  |  |  |  |  |  |  |
|    |                                                                                                              |                                                                                                                                                                                                                                                                                                                                                                        |                                                                                     |  |  |  |  |  |  |  |  |
|    |                                                                                                              |                                                                                                                                                                                                                                                                                                                                                                        |                                                                                     |  |  |  |  |  |  |  |  |
| 10 | Leadership or fiduciary role in other board, society, committee or advocacy group, paid or unpaid            | <input checked="" type="checkbox"/> <b>None</b><br><table border="1" style="width: 100%; border-collapse: collapse;"> <tr><td style="width: 50%; height: 15px;"></td><td style="width: 50%;"></td></tr> <tr><td style="height: 15px;"></td><td></td></tr> <tr><td style="height: 15px;"></td><td></td></tr> </table>                                                   |                                                                                     |  |  |  |  |  |  |  |  |
|    |                                                                                                              |                                                                                                                                                                                                                                                                                                                                                                        |                                                                                     |  |  |  |  |  |  |  |  |
|    |                                                                                                              |                                                                                                                                                                                                                                                                                                                                                                        |                                                                                     |  |  |  |  |  |  |  |  |
|    |                                                                                                              |                                                                                                                                                                                                                                                                                                                                                                        |                                                                                     |  |  |  |  |  |  |  |  |

|           |                                                                                  | Name all entities with whom you have this relationship or indicate none (add rows as needed)                                                                                                                                                                                                                         | Specifications/Comments (e.g., if payments were made to you or to your institution) |  |  |  |  |  |  |
|-----------|----------------------------------------------------------------------------------|----------------------------------------------------------------------------------------------------------------------------------------------------------------------------------------------------------------------------------------------------------------------------------------------------------------------|-------------------------------------------------------------------------------------|--|--|--|--|--|--|
| <b>11</b> | Stock or stock options                                                           | <input checked="" type="checkbox"/> <b>None</b><br><table border="1" style="width: 100%; border-collapse: collapse;"> <tr><td style="width: 50%; height: 15px;"></td><td style="width: 50%;"></td></tr> <tr><td style="height: 15px;"></td><td></td></tr> <tr><td style="height: 15px;"></td><td></td></tr> </table> |                                                                                     |  |  |  |  |  |  |
|           |                                                                                  |                                                                                                                                                                                                                                                                                                                      |                                                                                     |  |  |  |  |  |  |
|           |                                                                                  |                                                                                                                                                                                                                                                                                                                      |                                                                                     |  |  |  |  |  |  |
|           |                                                                                  |                                                                                                                                                                                                                                                                                                                      |                                                                                     |  |  |  |  |  |  |
| <b>12</b> | Receipt of equipment, materials, drugs, medical writing, gifts or other services | <input checked="" type="checkbox"/> <b>None</b><br><table border="1" style="width: 100%; border-collapse: collapse;"> <tr><td style="width: 50%; height: 15px;"></td><td style="width: 50%;"></td></tr> <tr><td style="height: 15px;"></td><td></td></tr> <tr><td style="height: 15px;"></td><td></td></tr> </table> |                                                                                     |  |  |  |  |  |  |
|           |                                                                                  |                                                                                                                                                                                                                                                                                                                      |                                                                                     |  |  |  |  |  |  |
|           |                                                                                  |                                                                                                                                                                                                                                                                                                                      |                                                                                     |  |  |  |  |  |  |
|           |                                                                                  |                                                                                                                                                                                                                                                                                                                      |                                                                                     |  |  |  |  |  |  |
| <b>13</b> | Other financial or non-financial interests                                       | <input checked="" type="checkbox"/> <b>None</b><br><table border="1" style="width: 100%; border-collapse: collapse;"> <tr><td style="width: 50%; height: 15px;"></td><td style="width: 50%;"></td></tr> <tr><td style="height: 15px;"></td><td></td></tr> <tr><td style="height: 15px;"></td><td></td></tr> </table> |                                                                                     |  |  |  |  |  |  |
|           |                                                                                  |                                                                                                                                                                                                                                                                                                                      |                                                                                     |  |  |  |  |  |  |
|           |                                                                                  |                                                                                                                                                                                                                                                                                                                      |                                                                                     |  |  |  |  |  |  |
|           |                                                                                  |                                                                                                                                                                                                                                                                                                                      |                                                                                     |  |  |  |  |  |  |

**Please place an "X" next to the following statement to indicate your agreement:**

I certify that I have answered every question and have not altered the wording of any of the questions on this form.
